# Supplementary material
Source: PubMed Central journal article supplement (PMC3235048)

**Palladium-Catalyzed Regio-, Diastereo-, and Enantioselective Benzylic Allylation  
of 2-Substituted Pyridines**

Barry M. Trost and David A. Thaisrivongs

*Department of Chemistry, Stanford University, Stanford, California 94305-5080*

**Spectral Data**

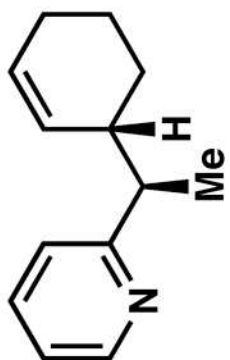

3a

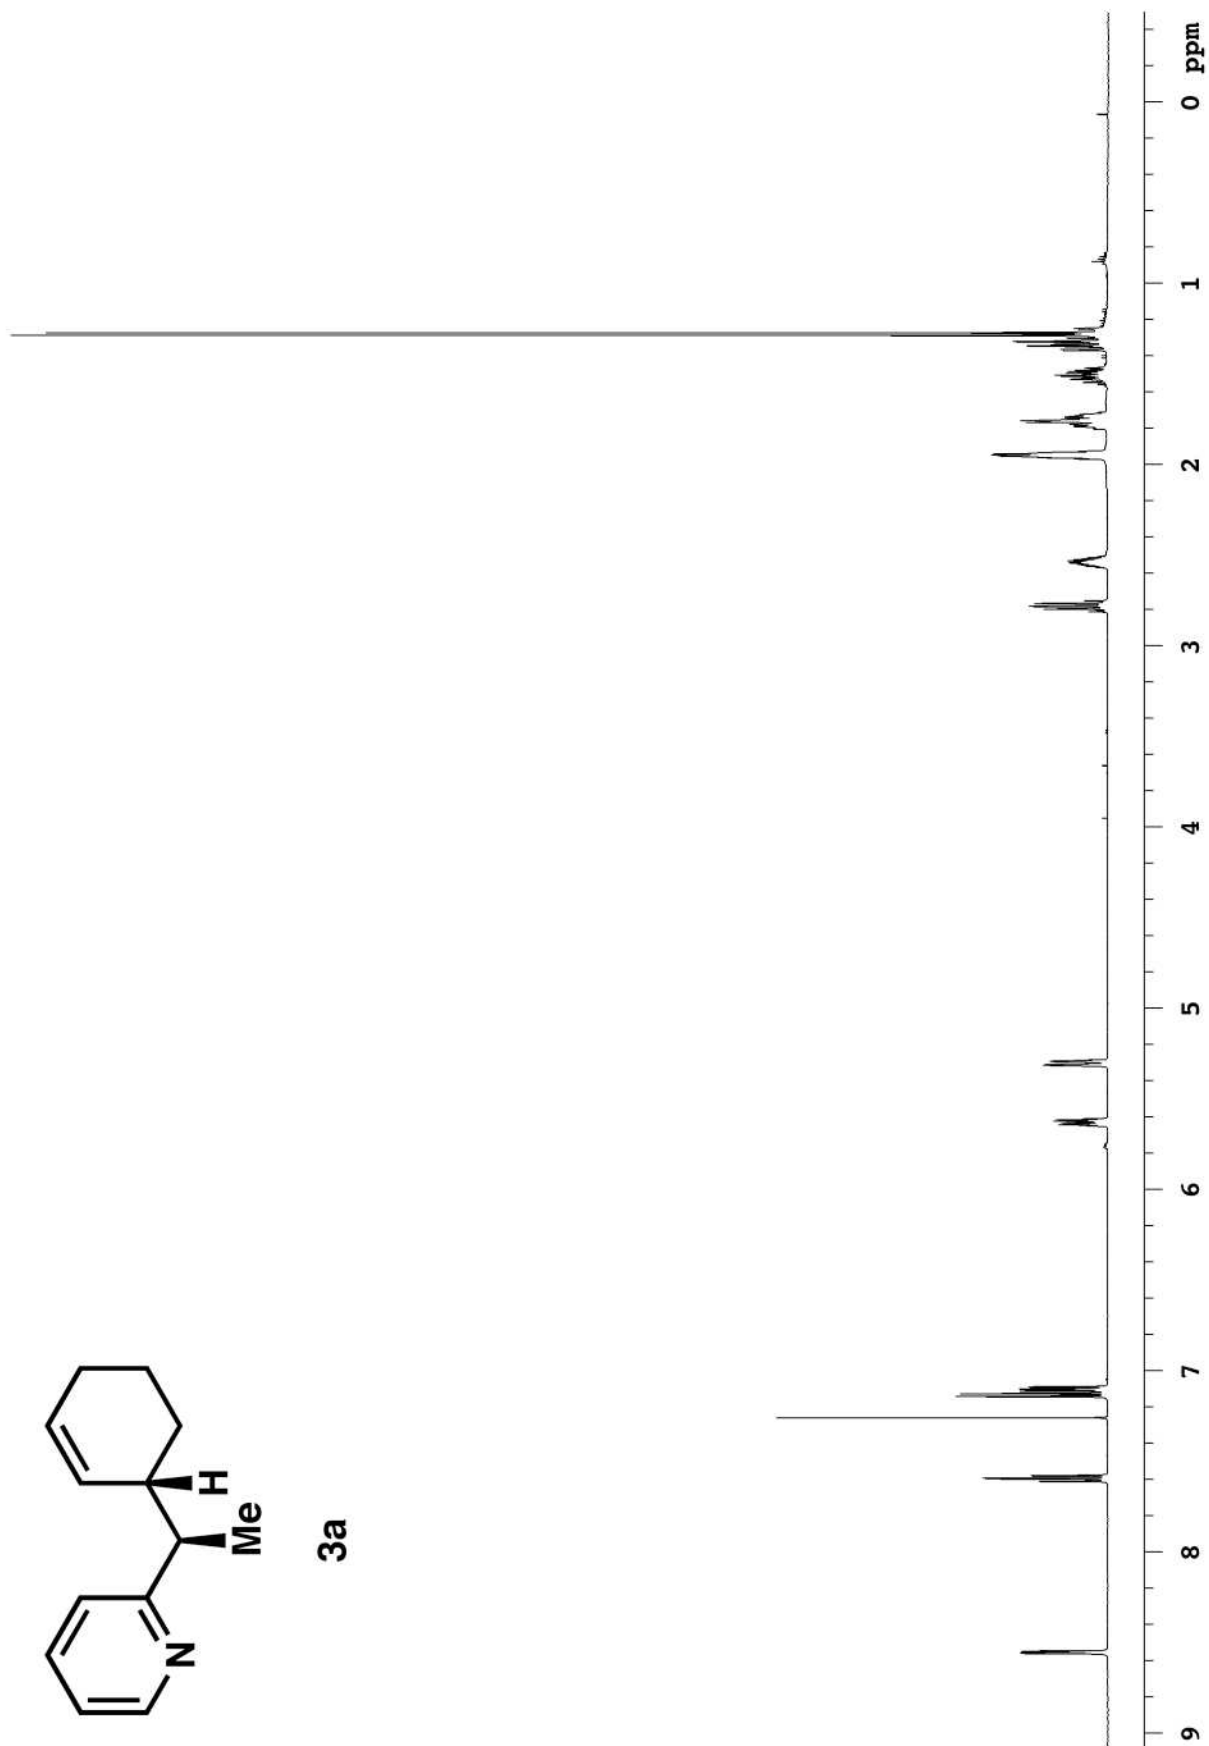

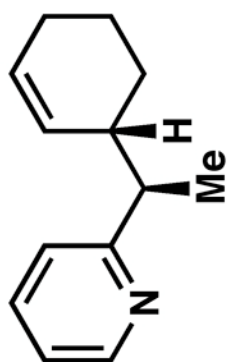

3a

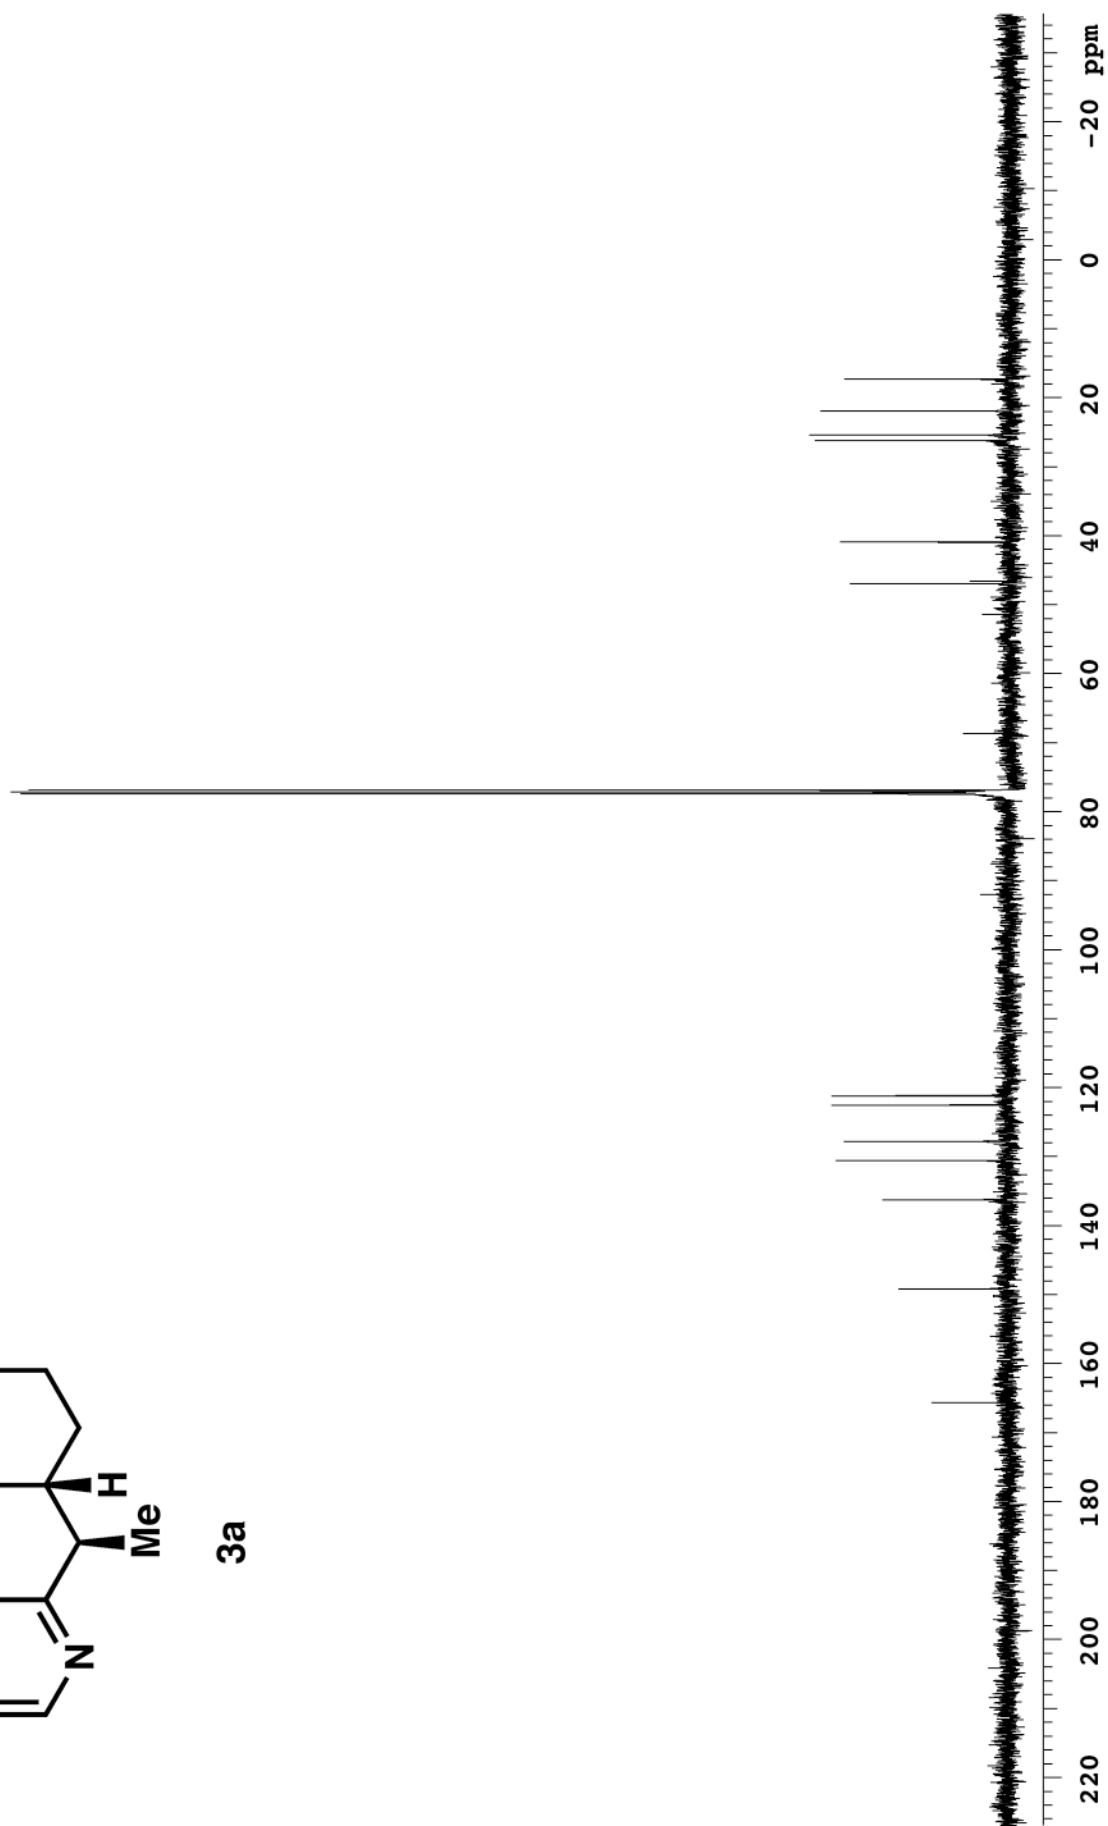

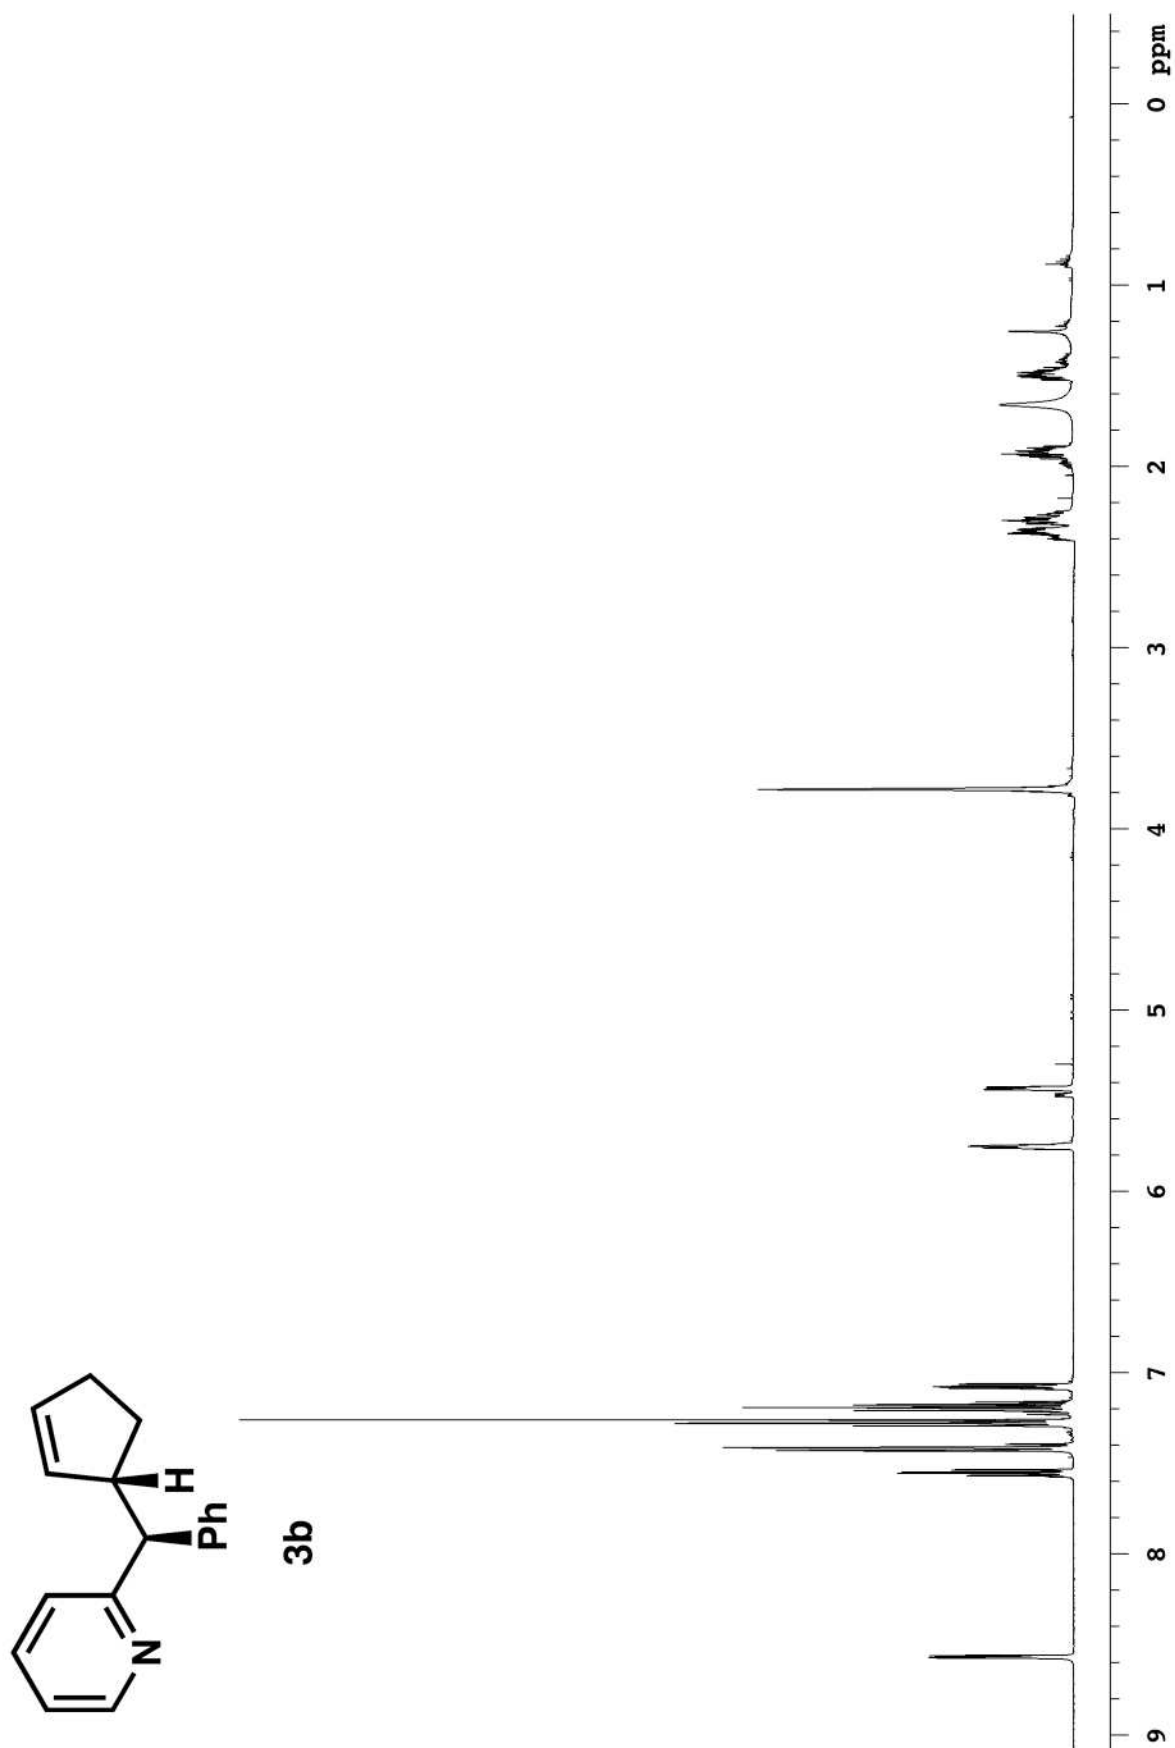

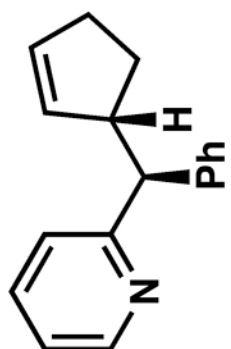

3b

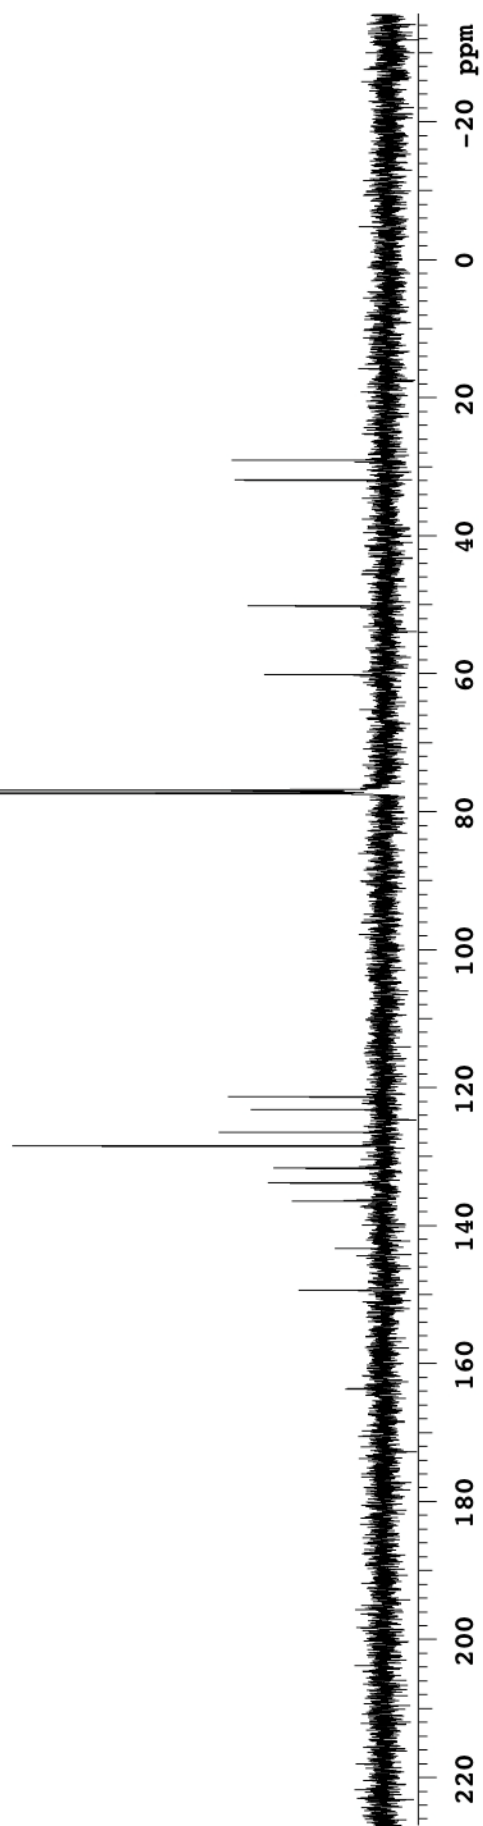

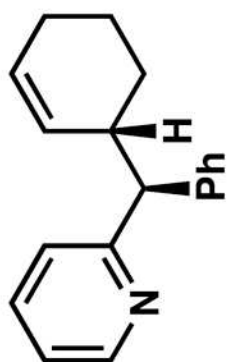

3c

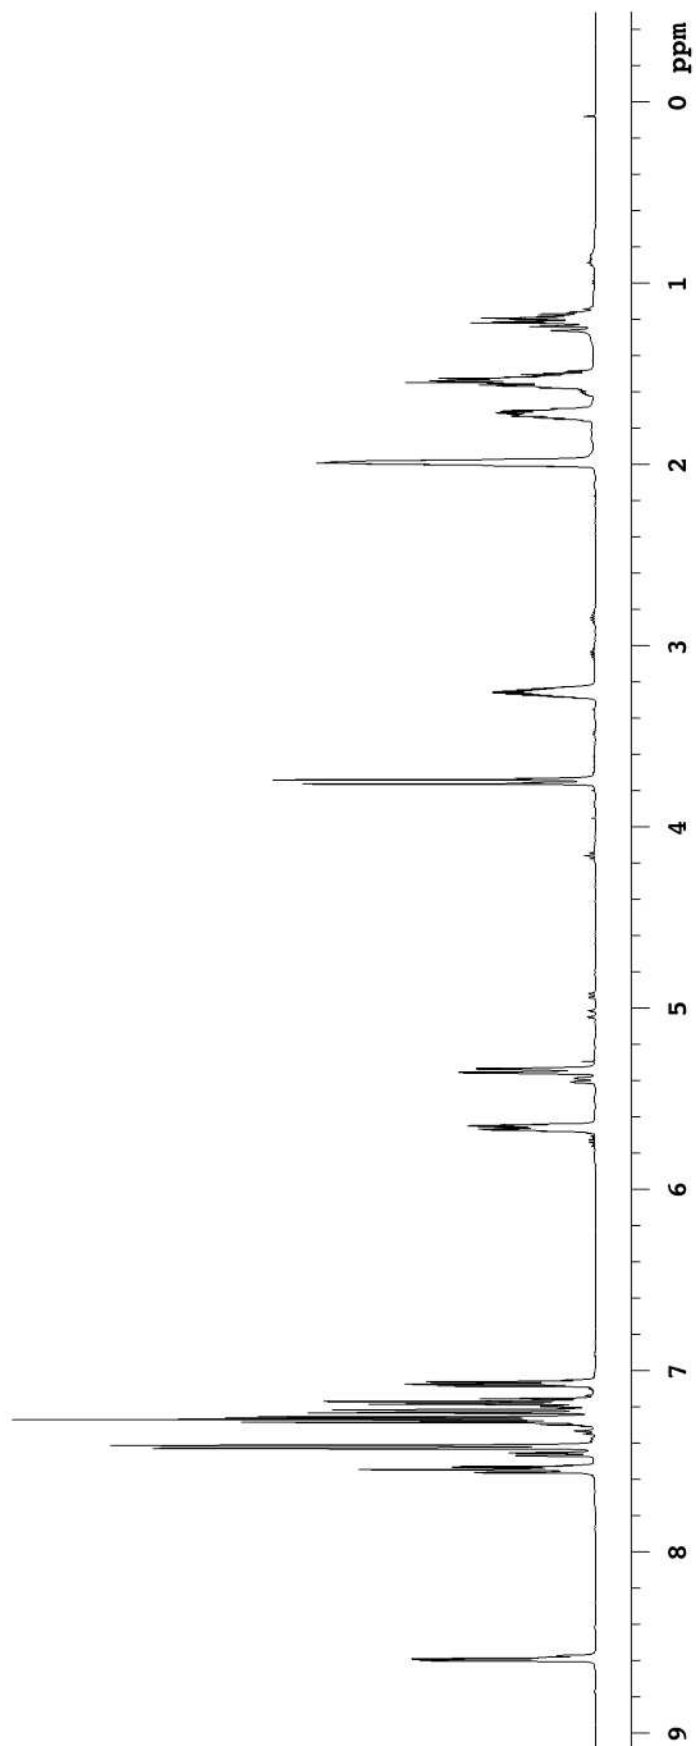

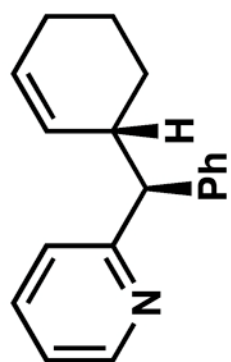

3c

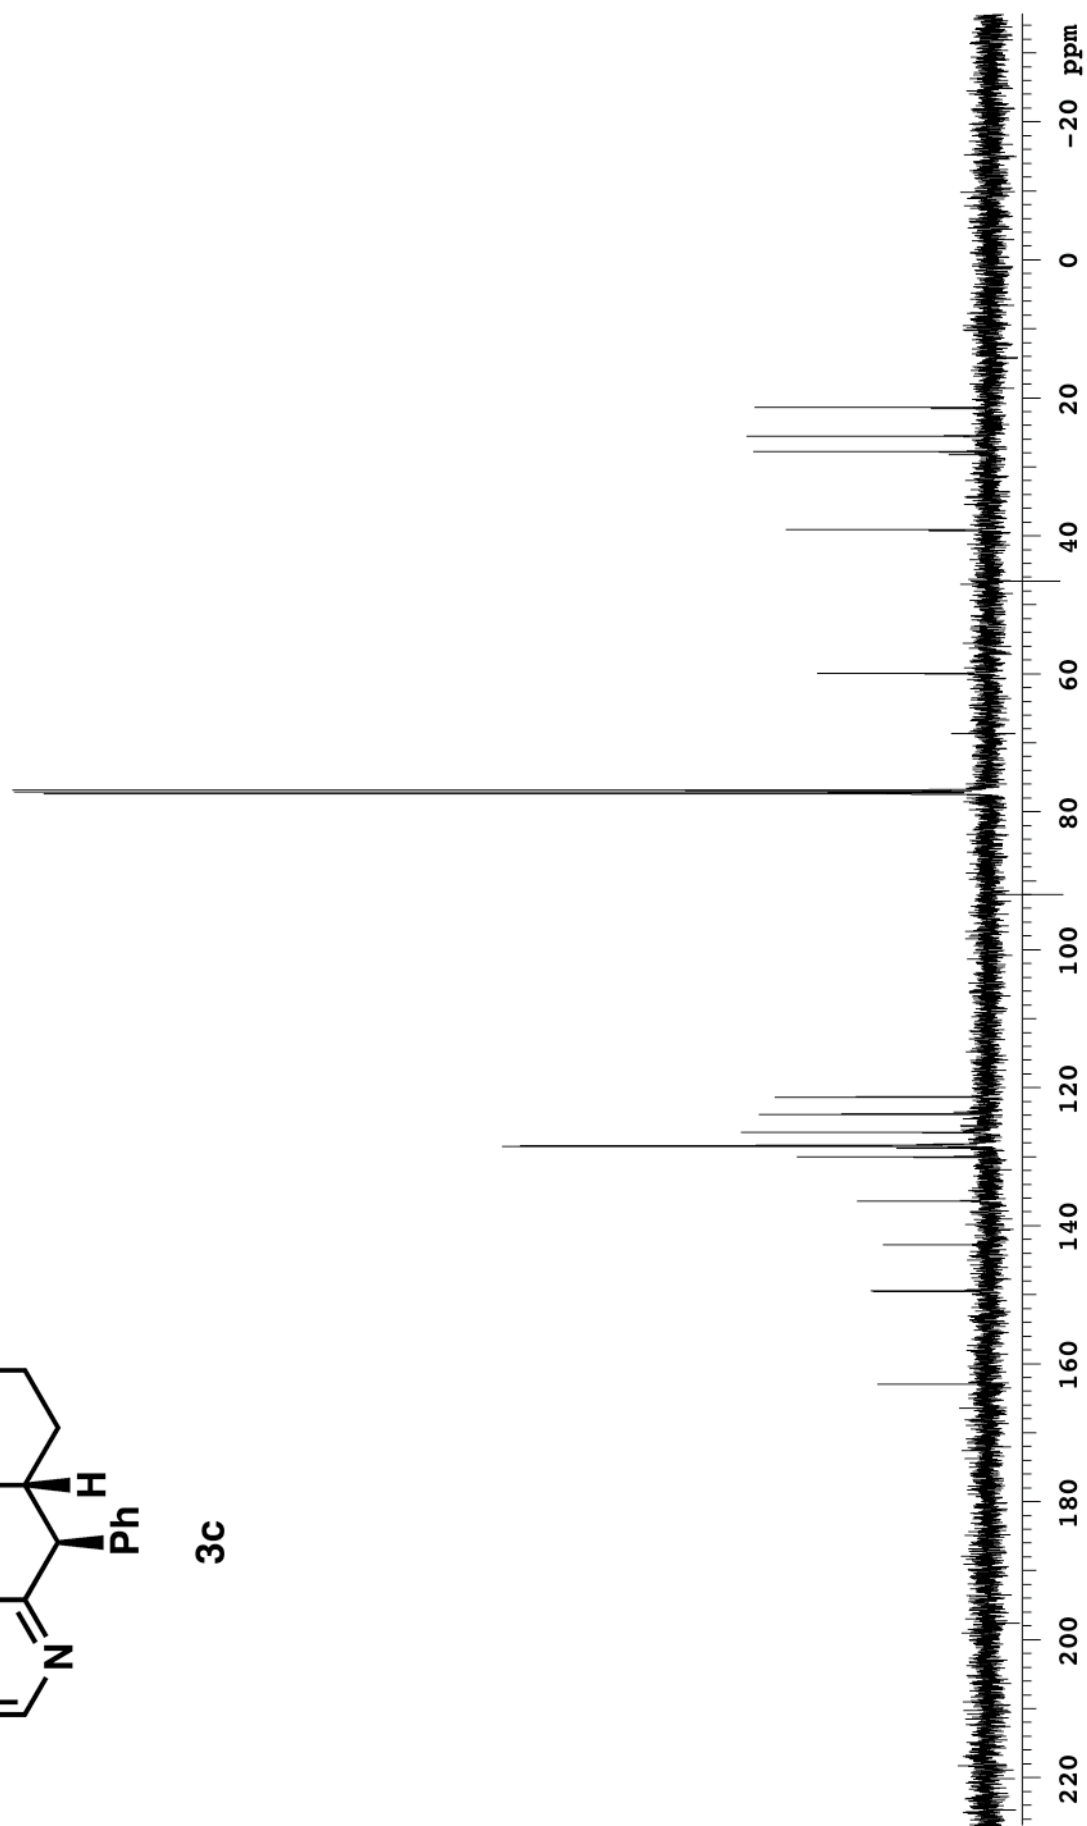

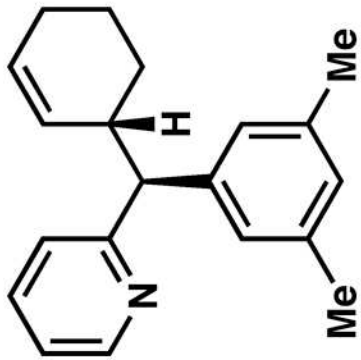

3d

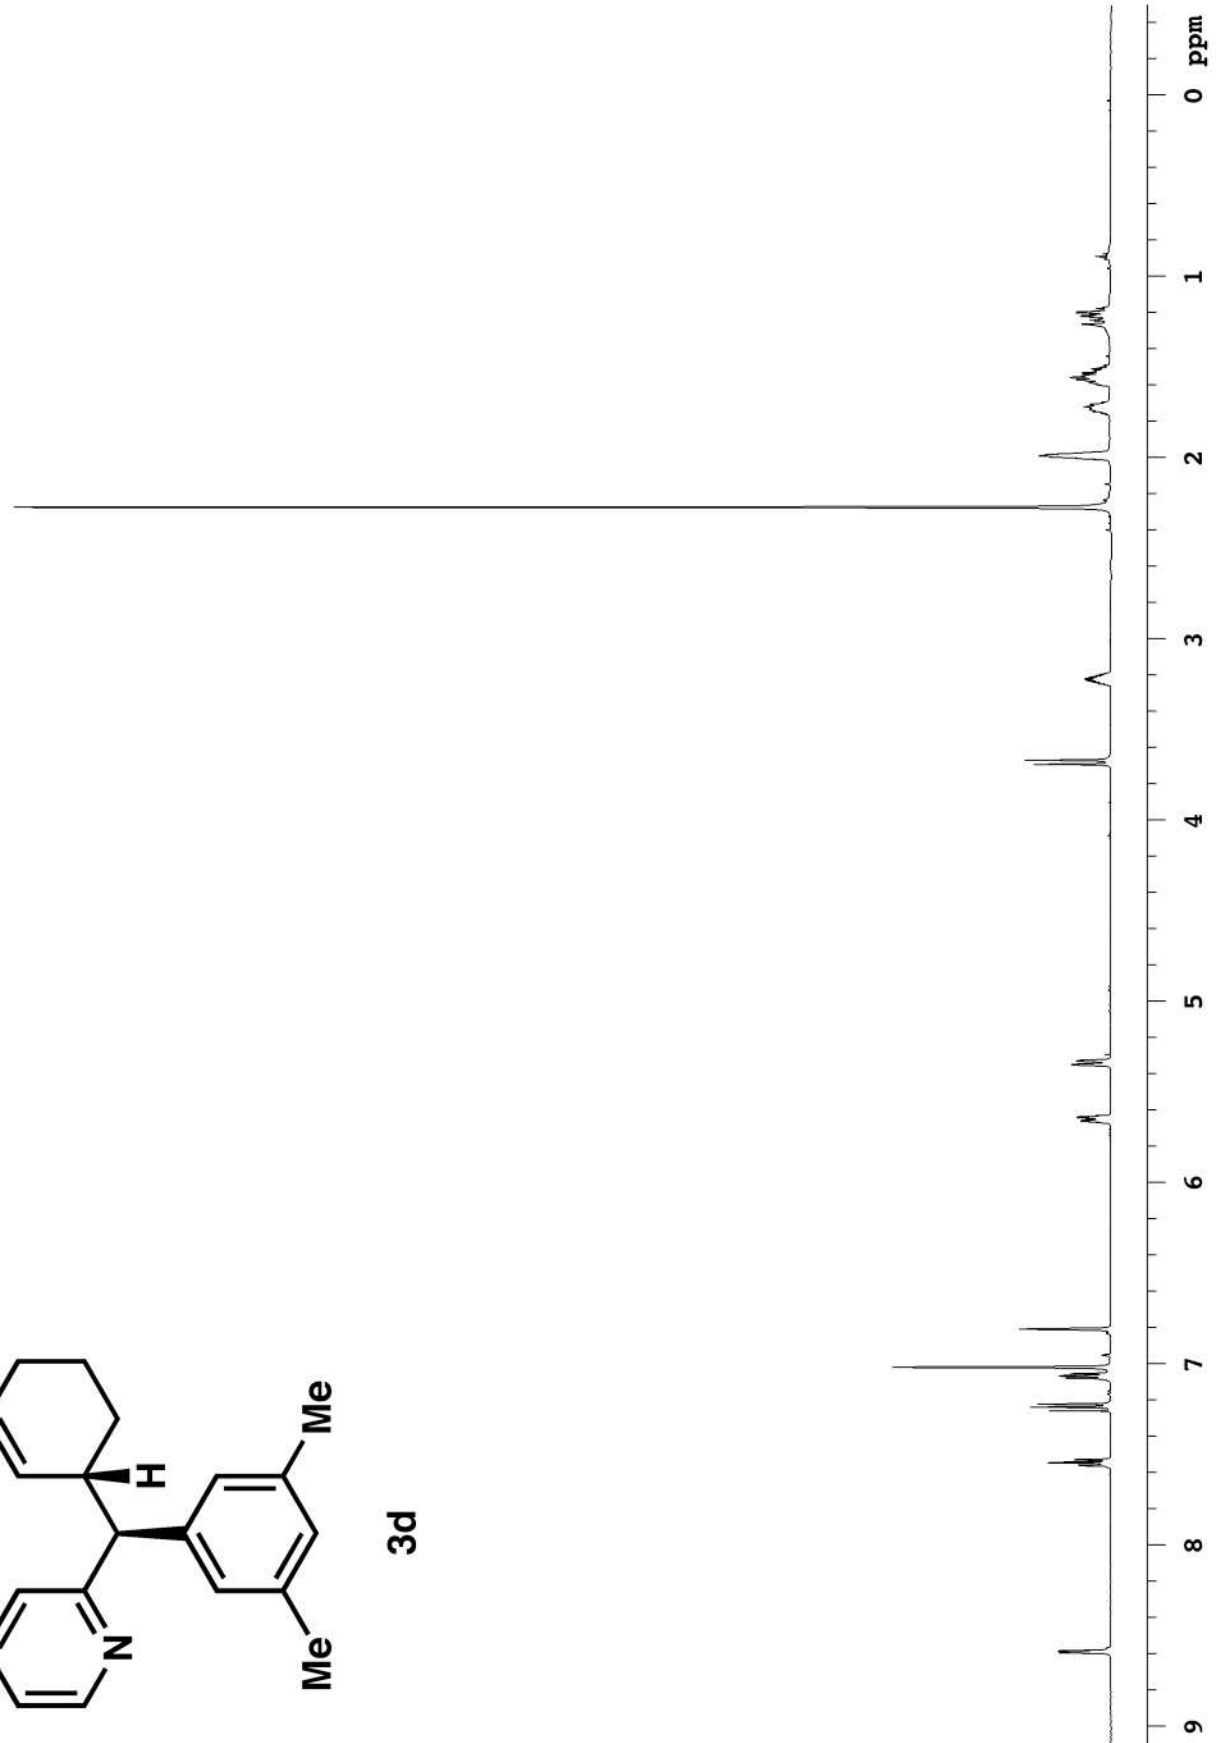



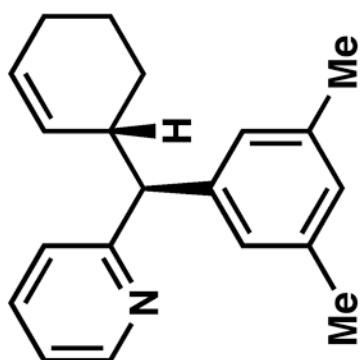

3d

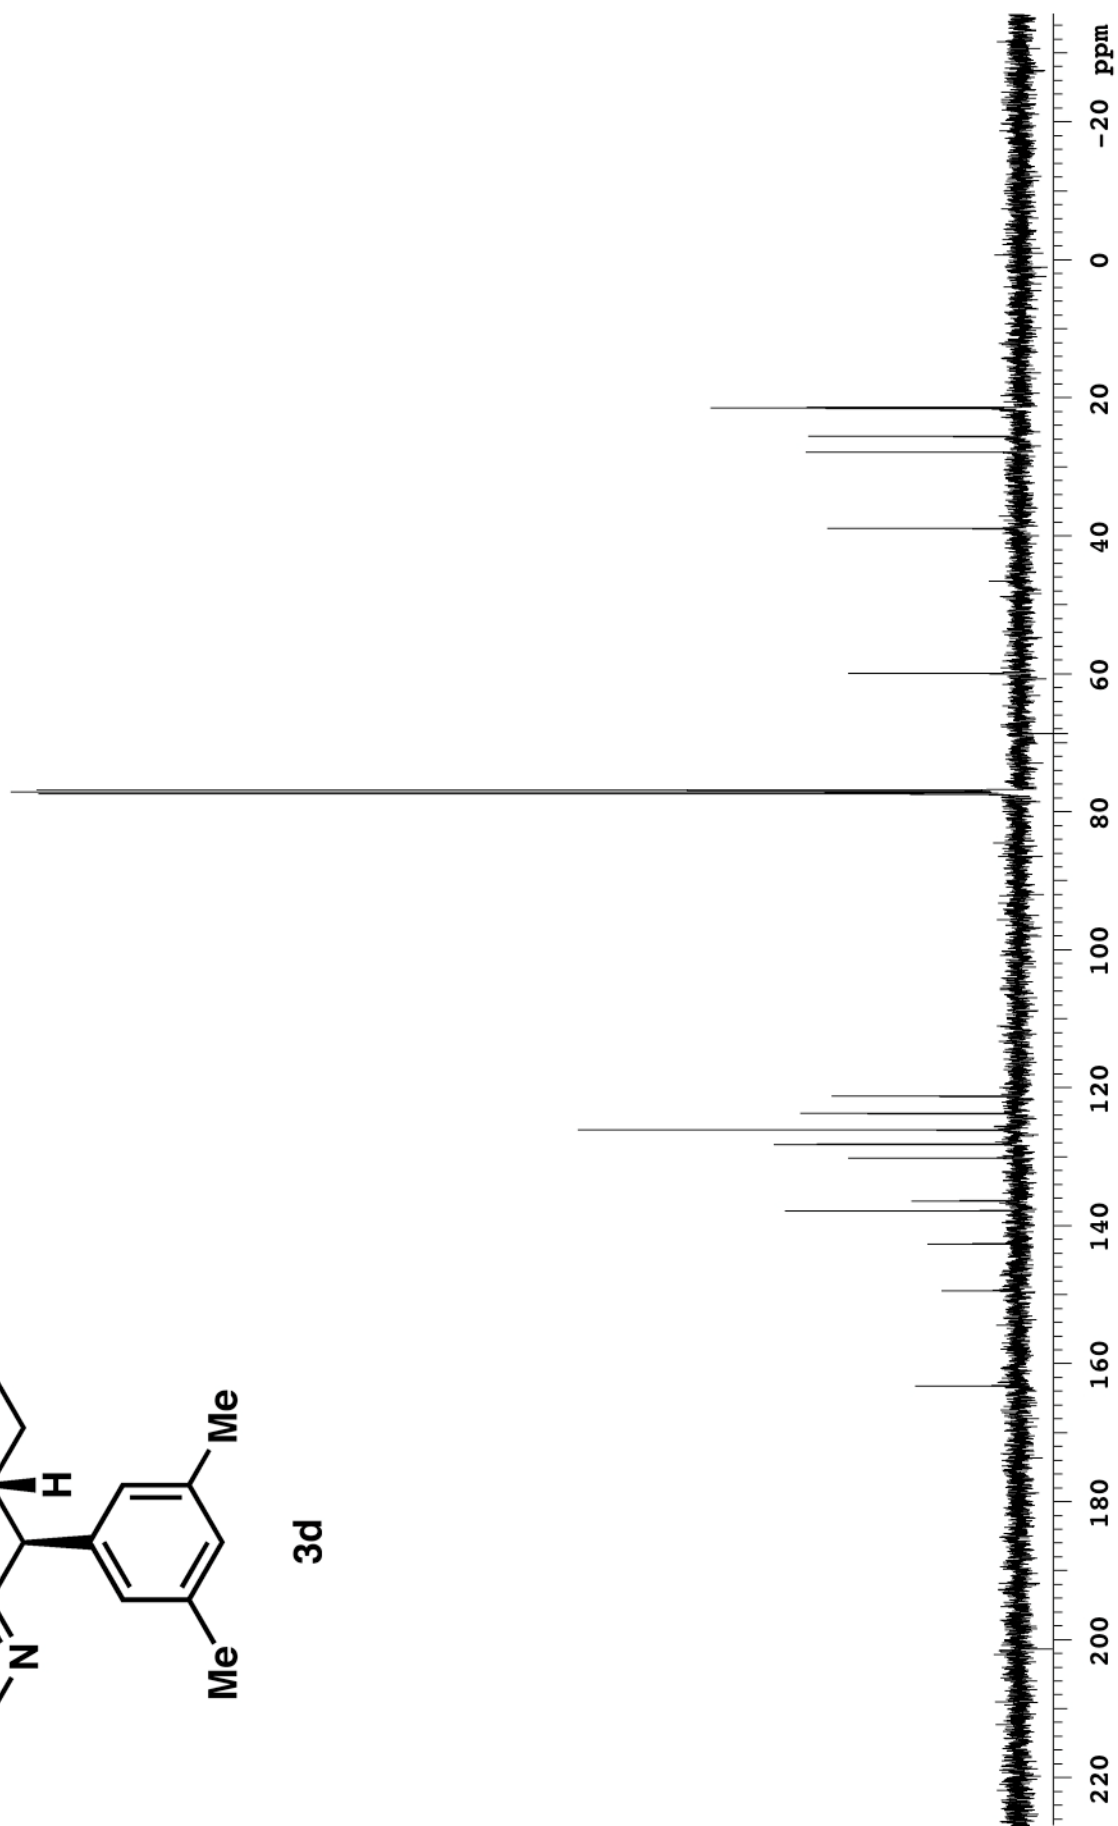

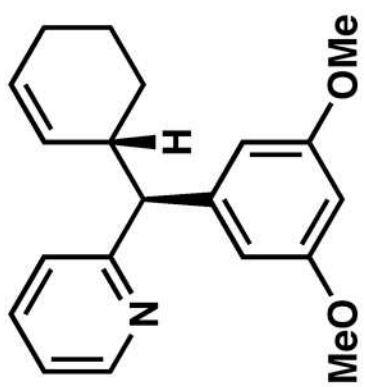

3e

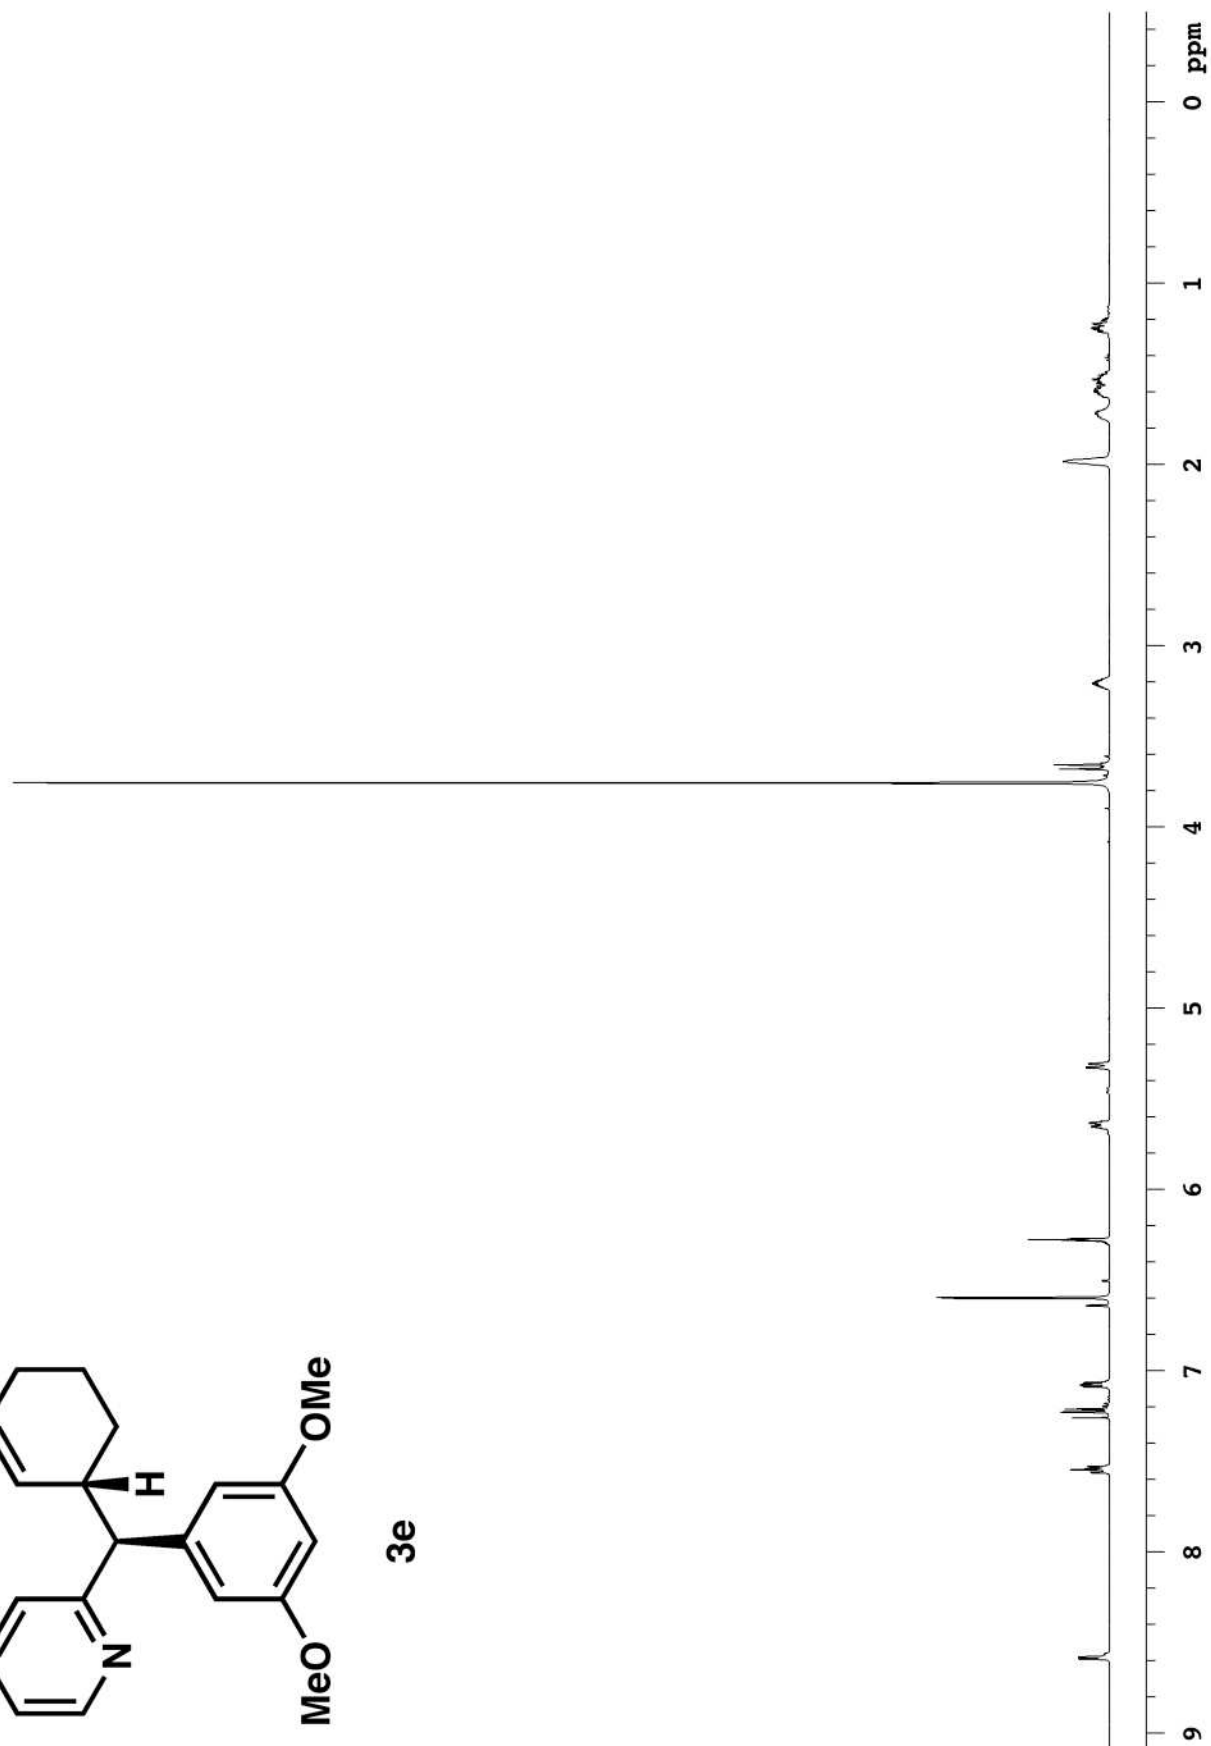

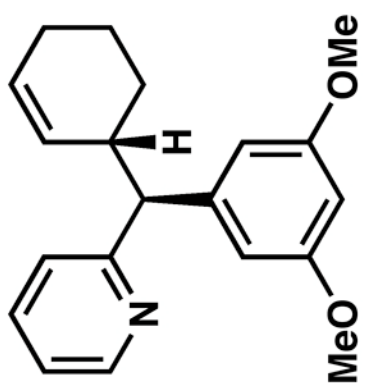

3e

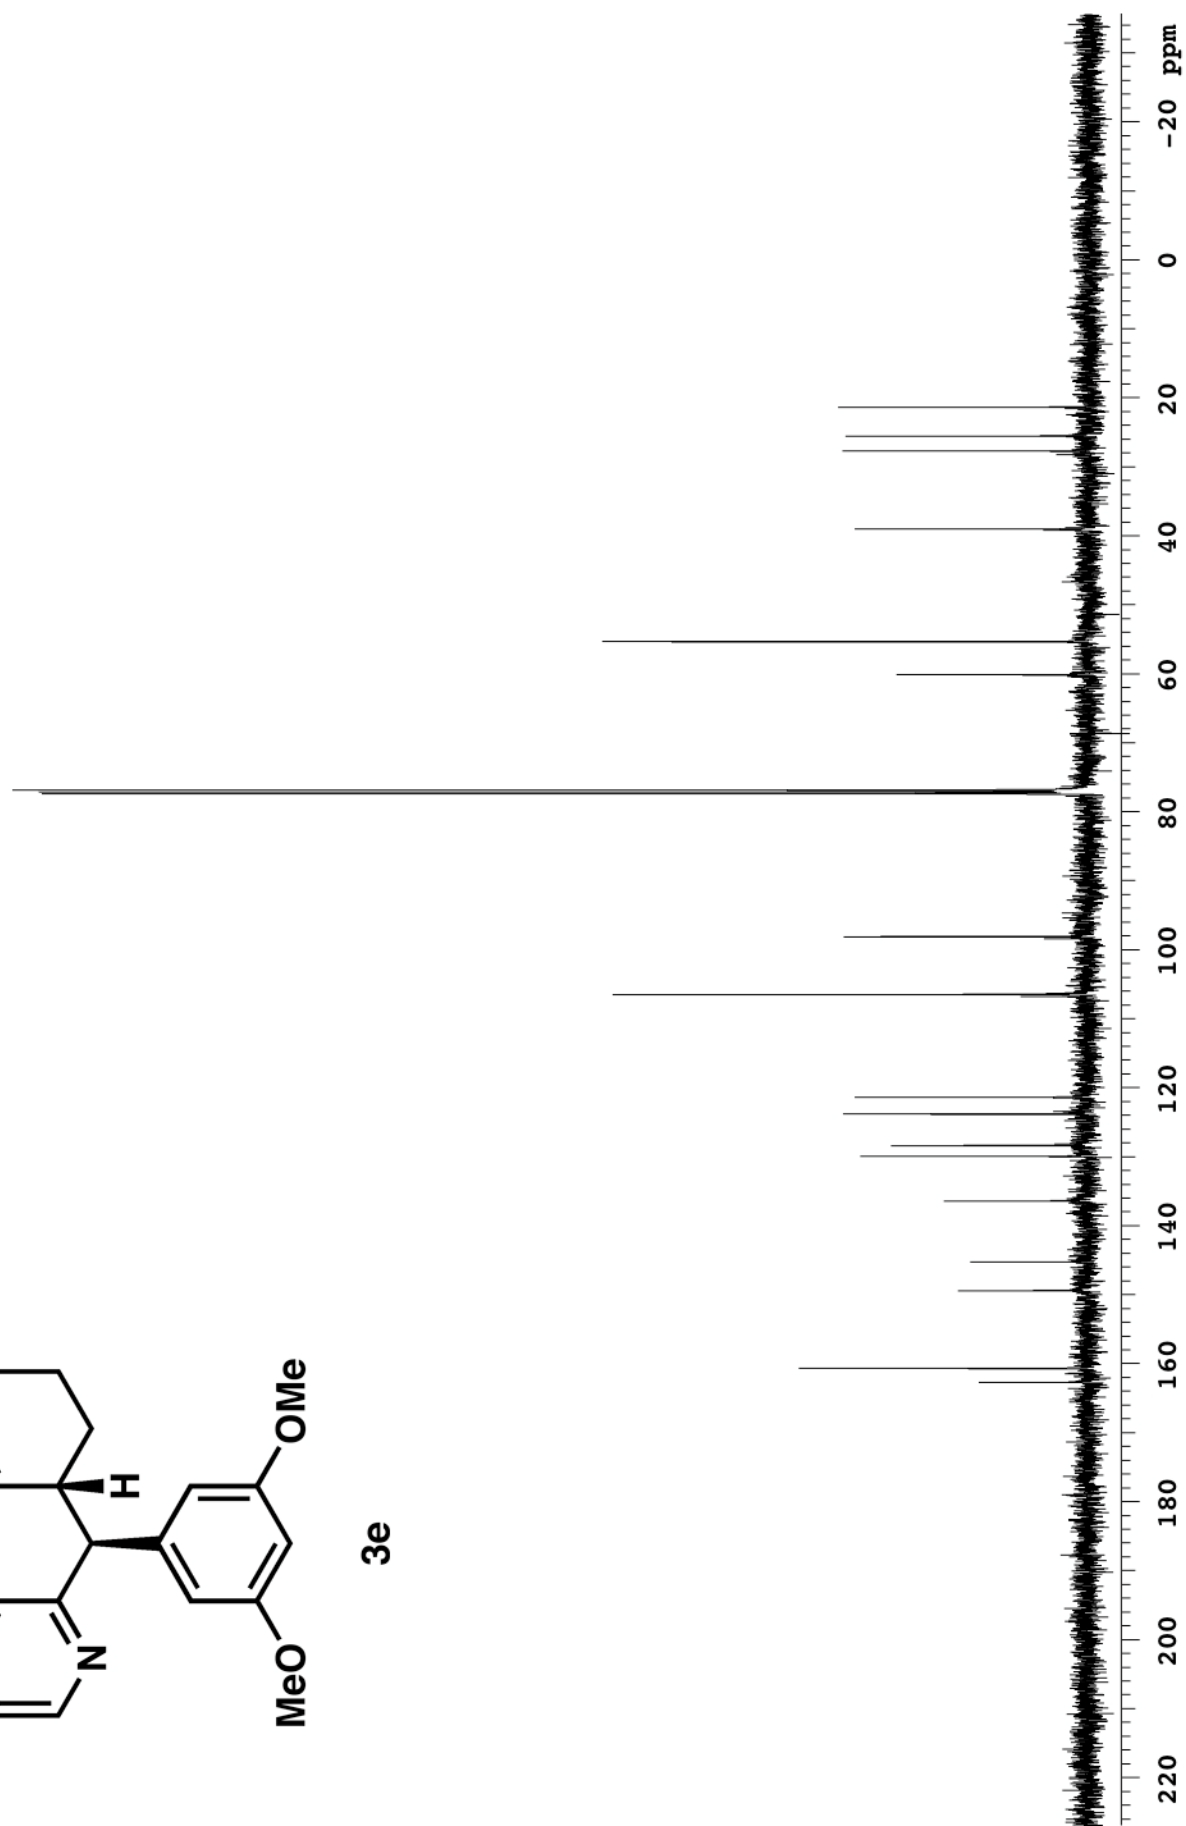

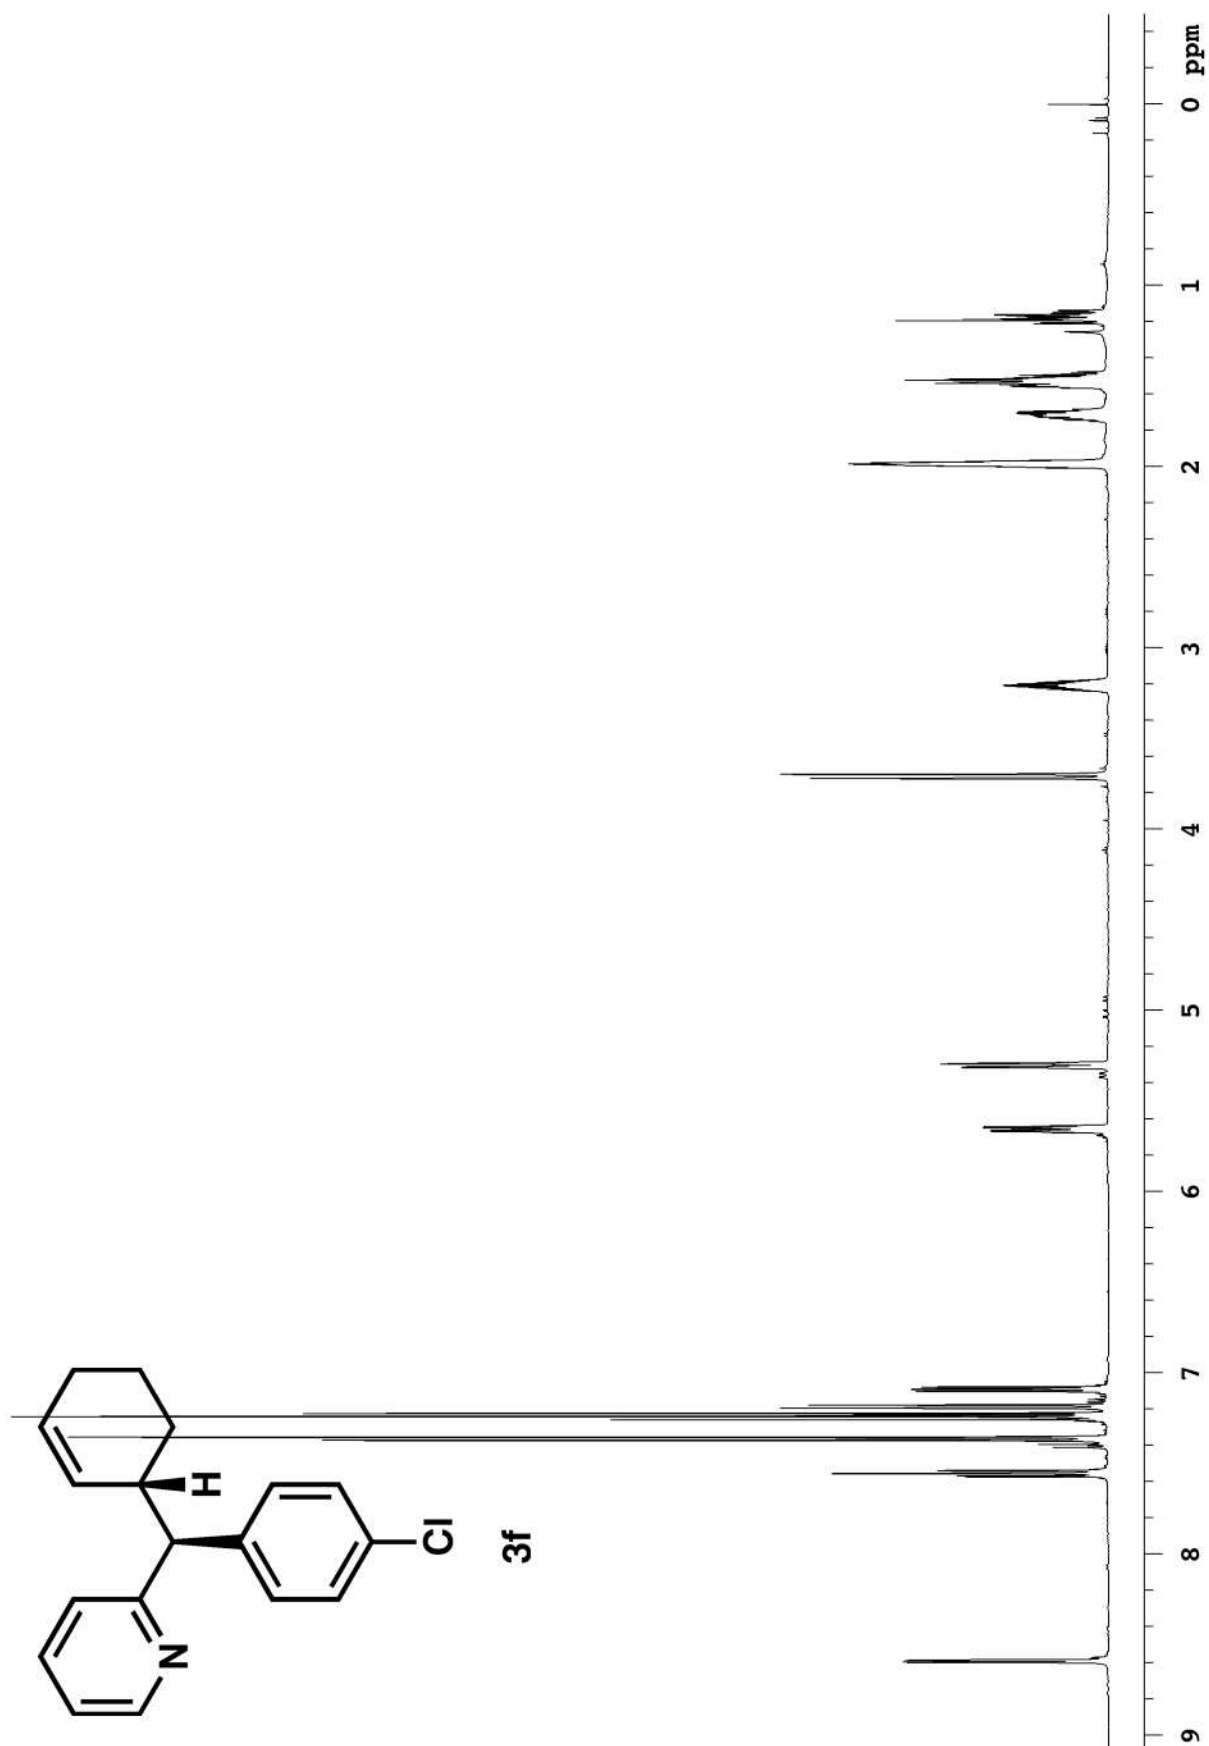

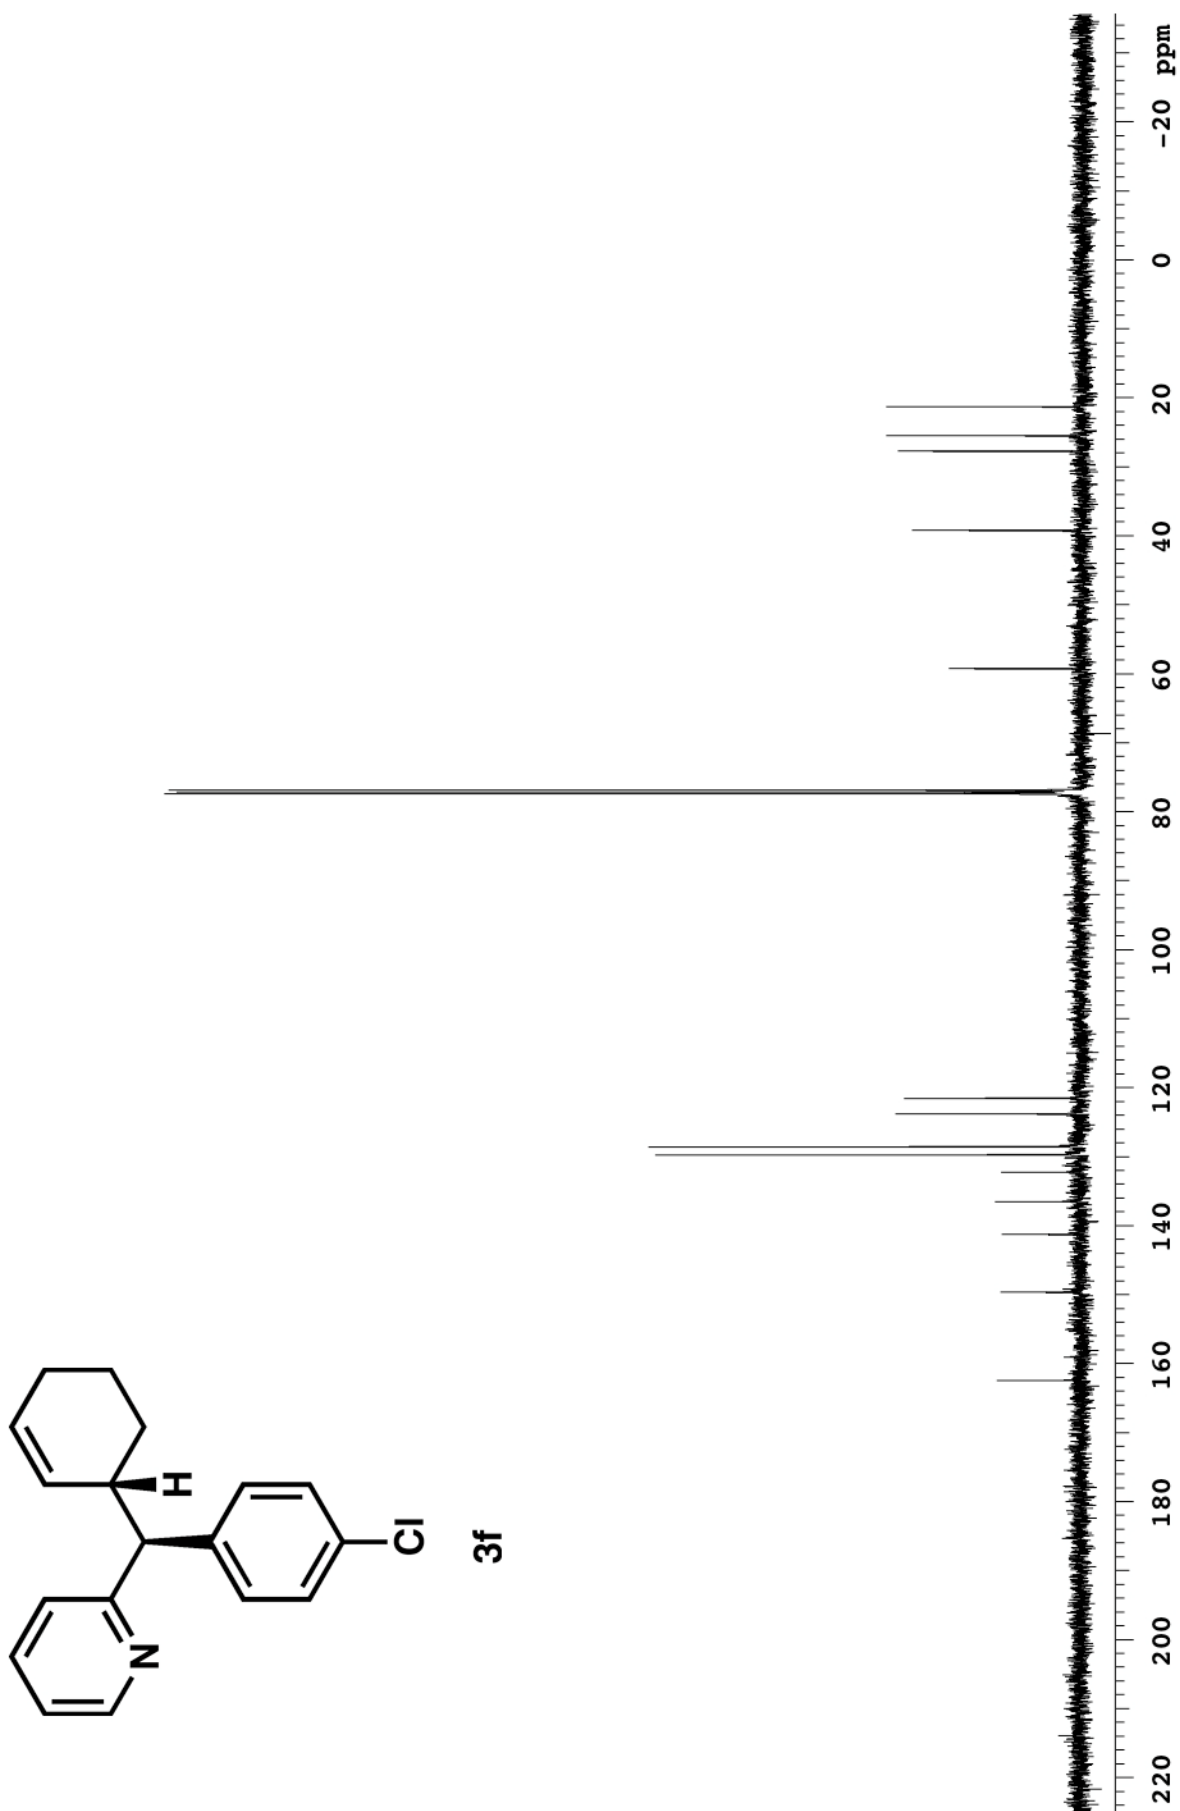

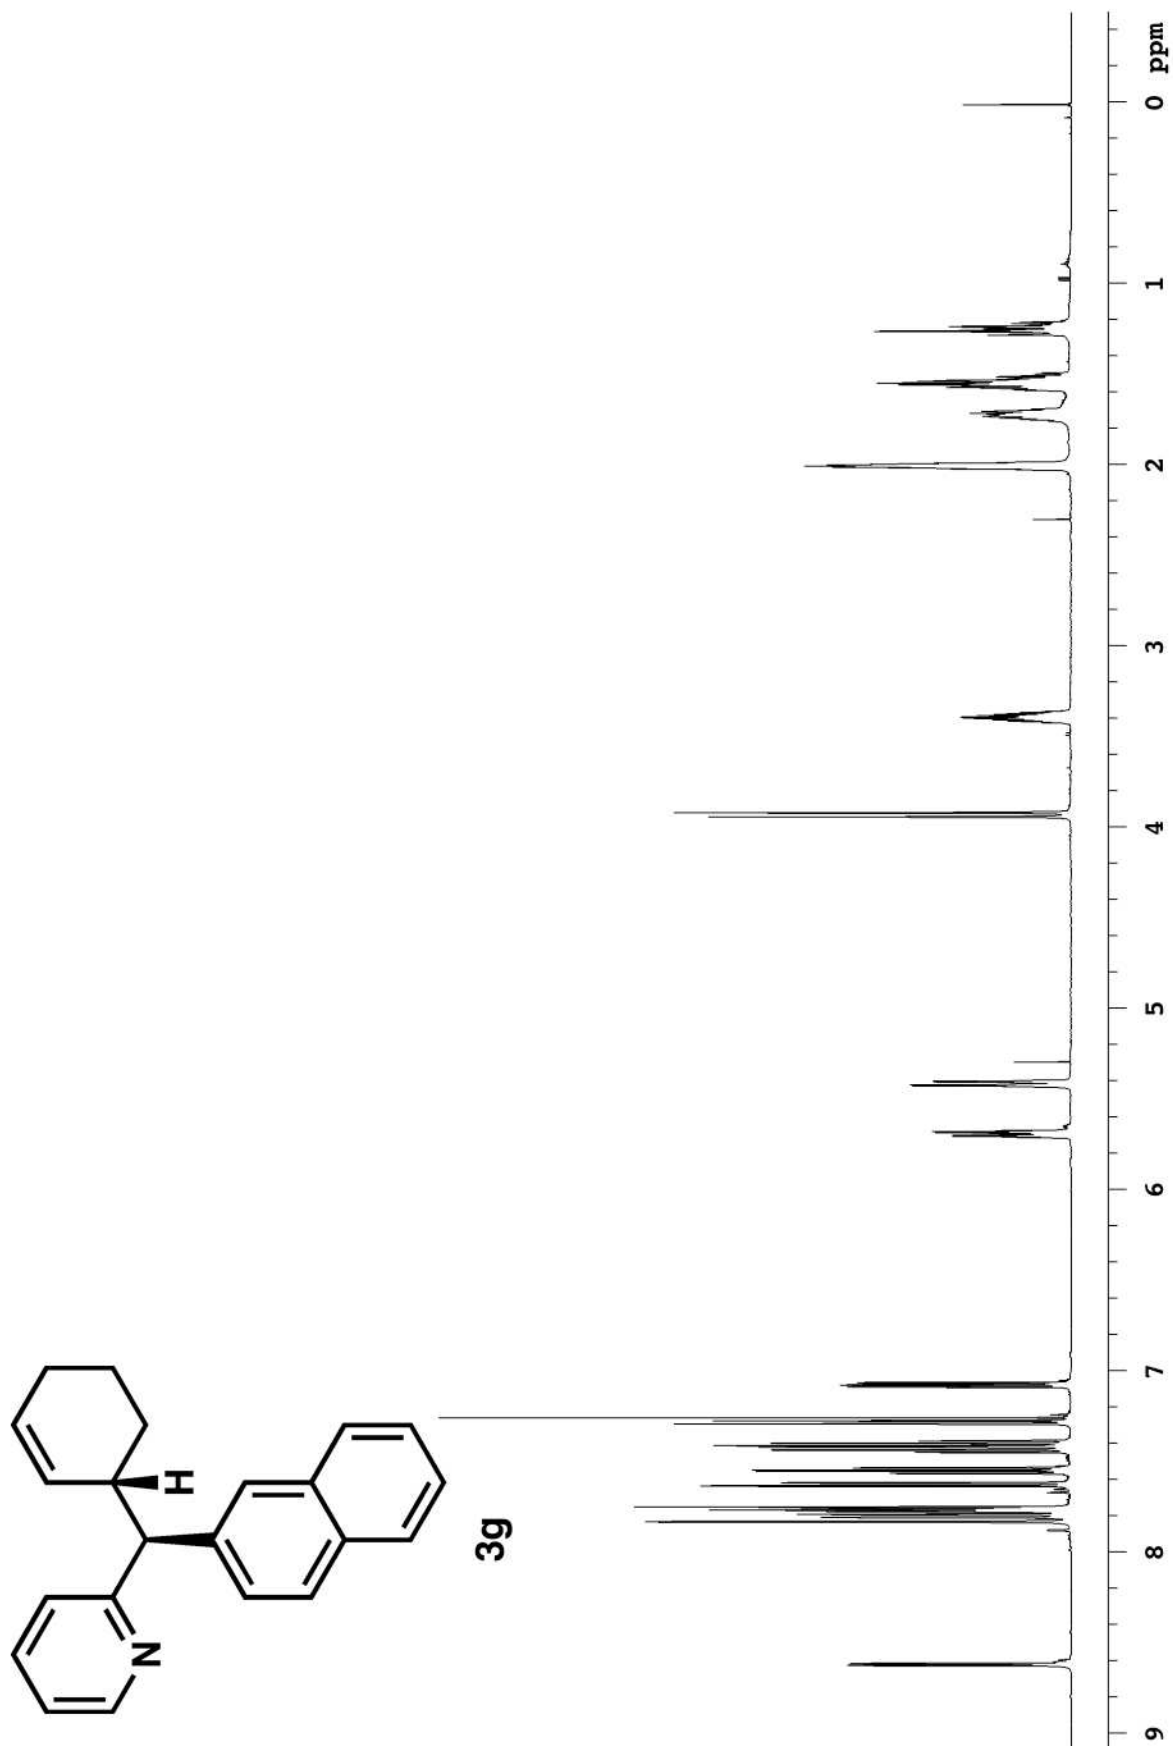

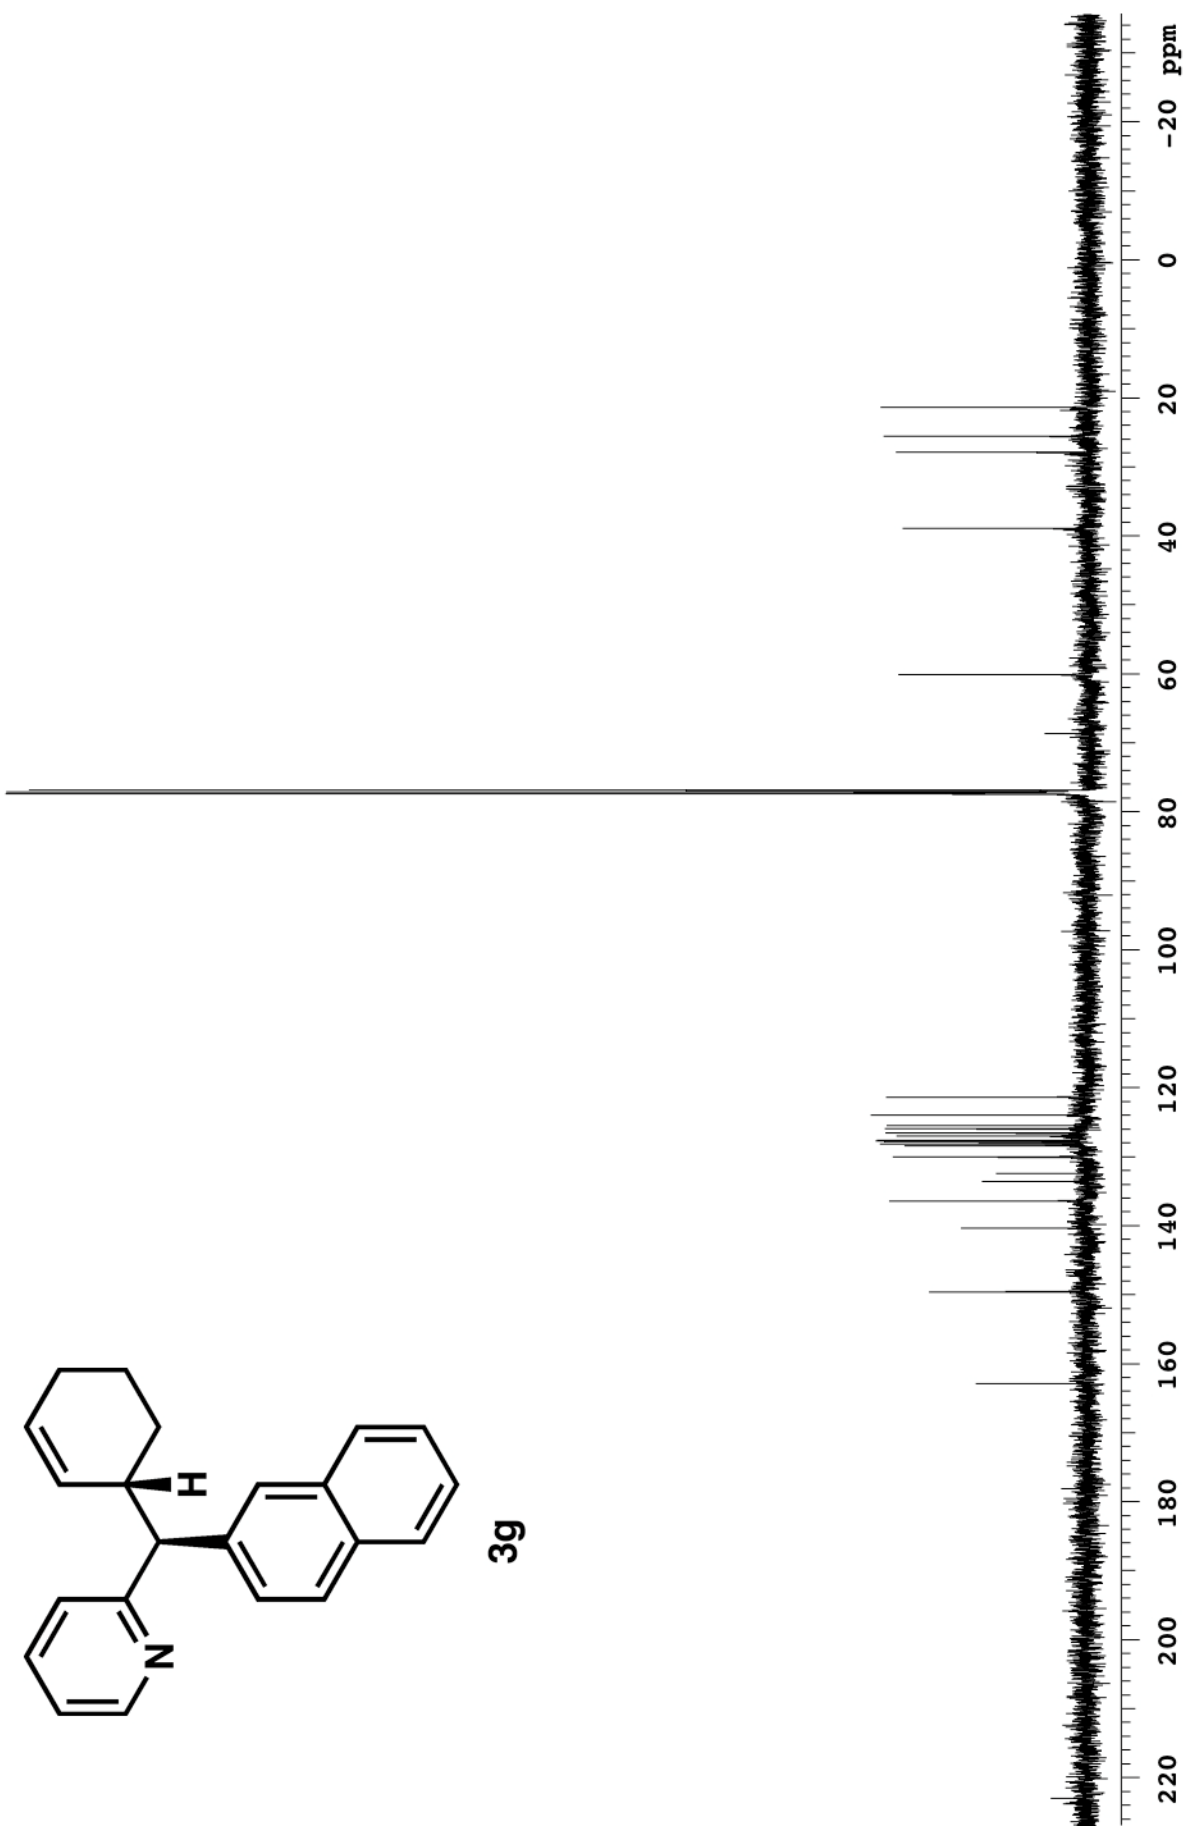

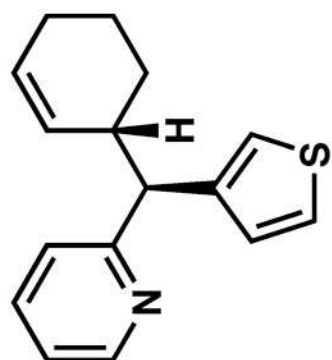

3h

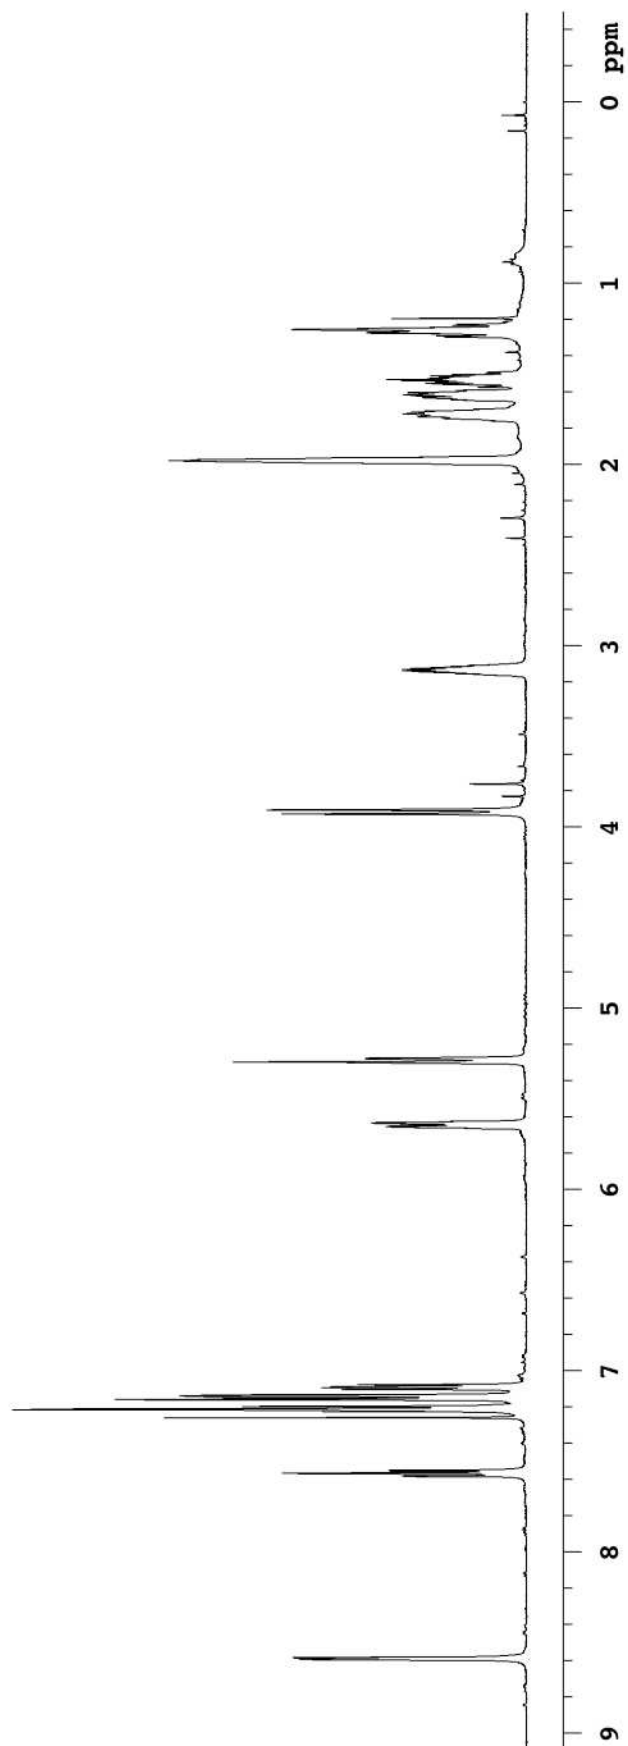



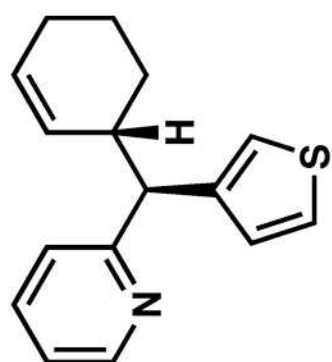

3h

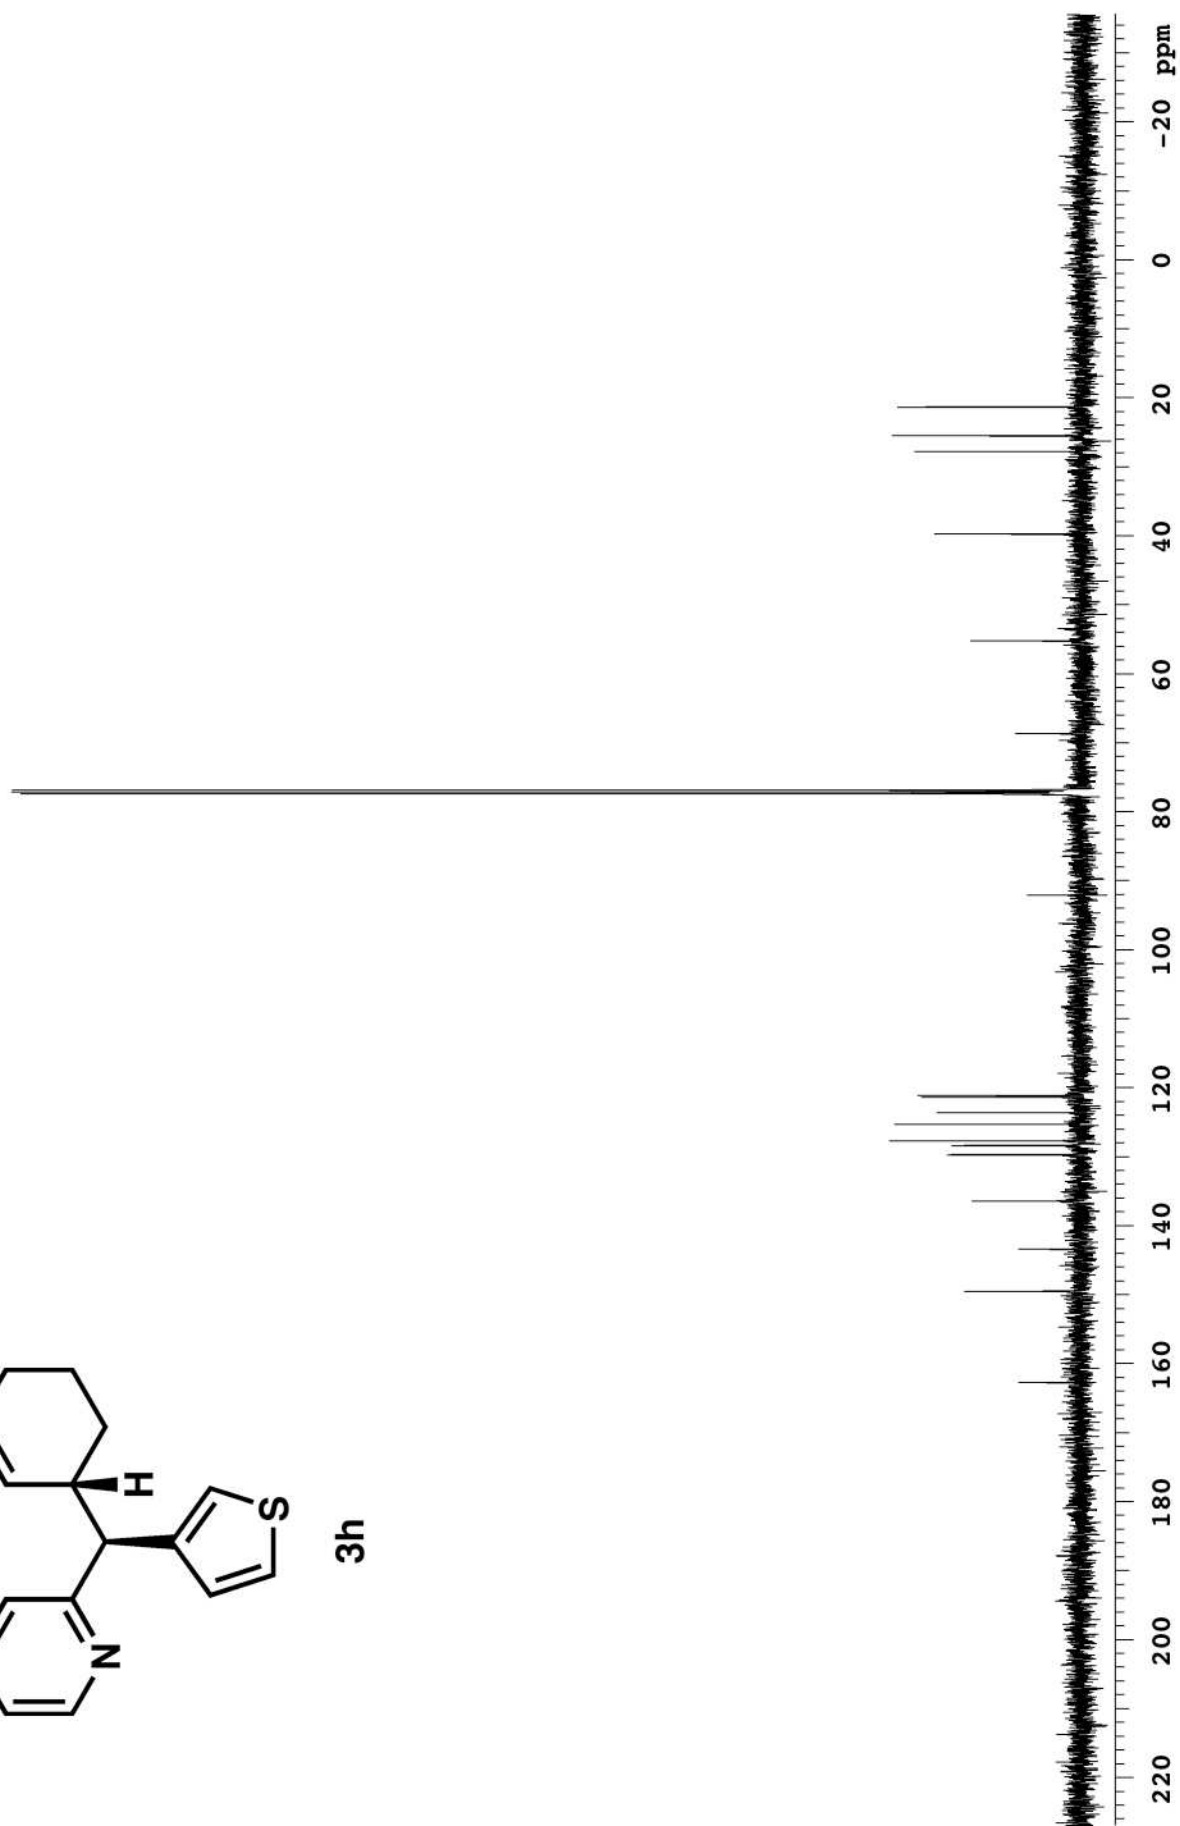

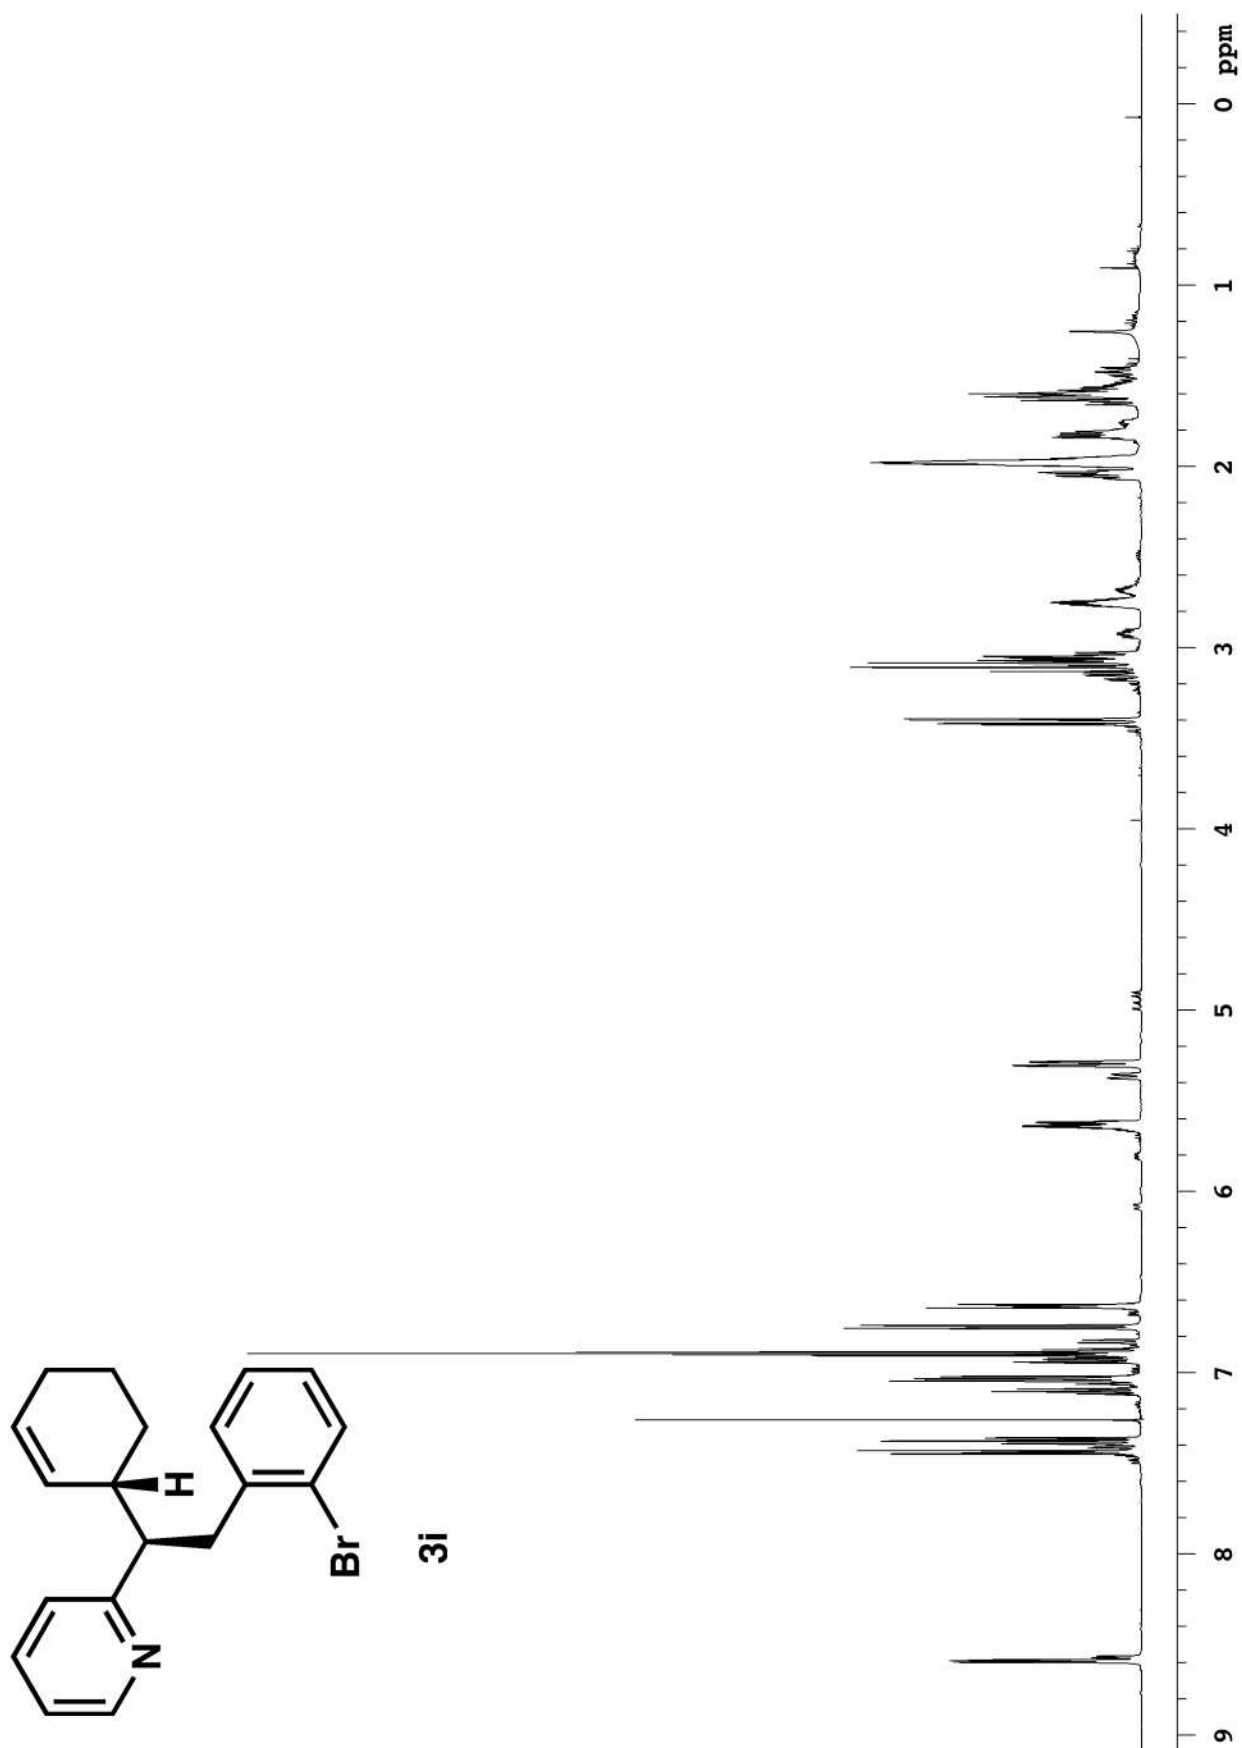

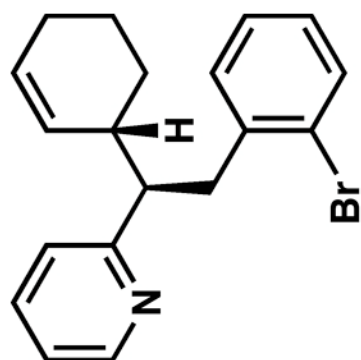

3i

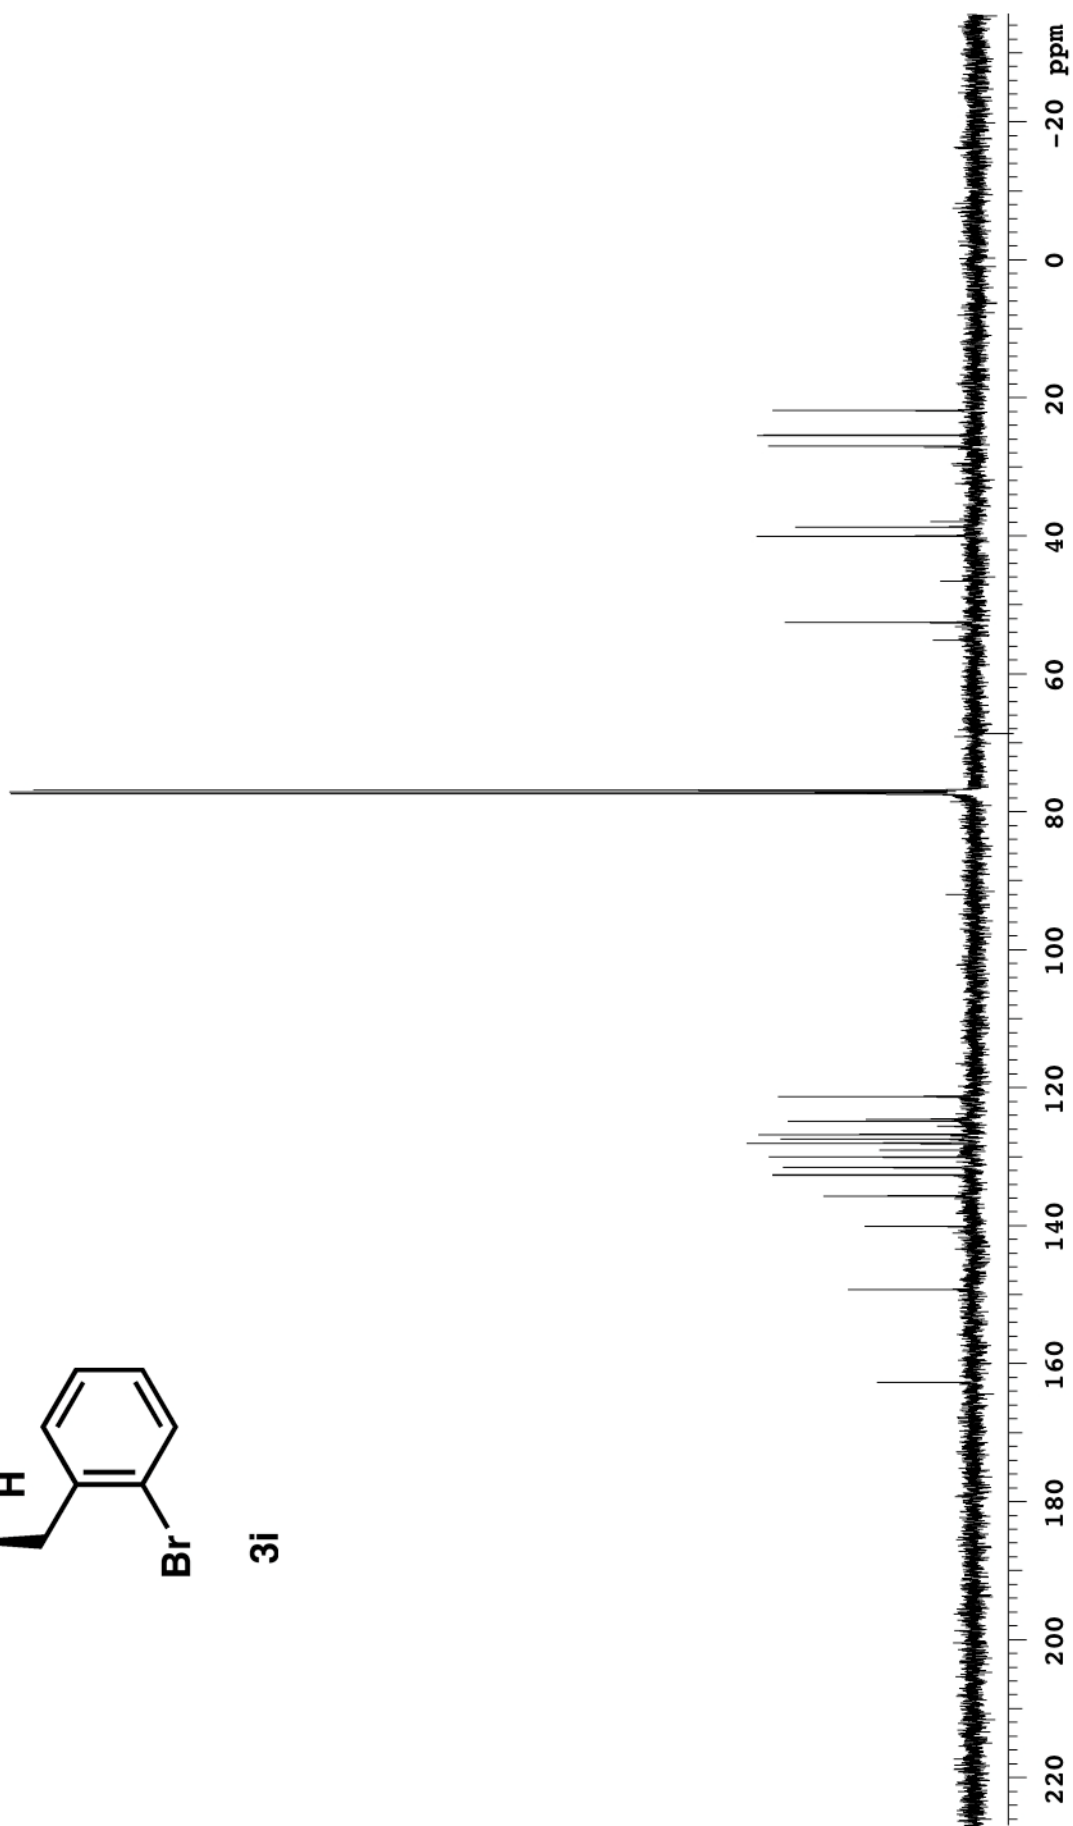

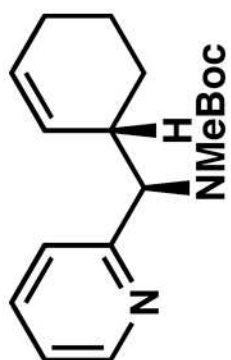

3j

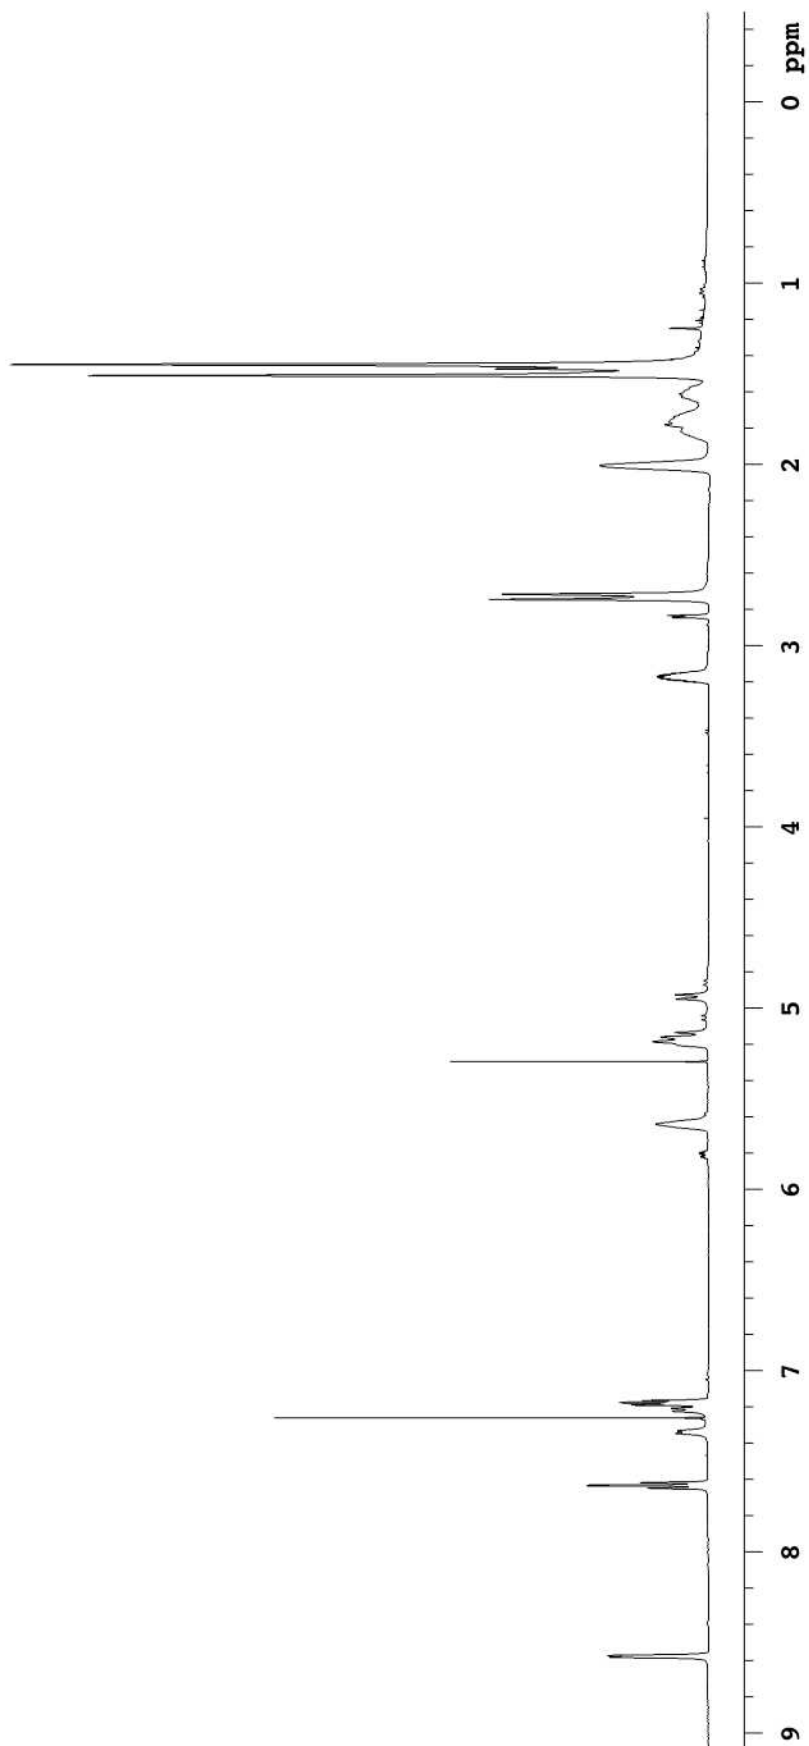



3j

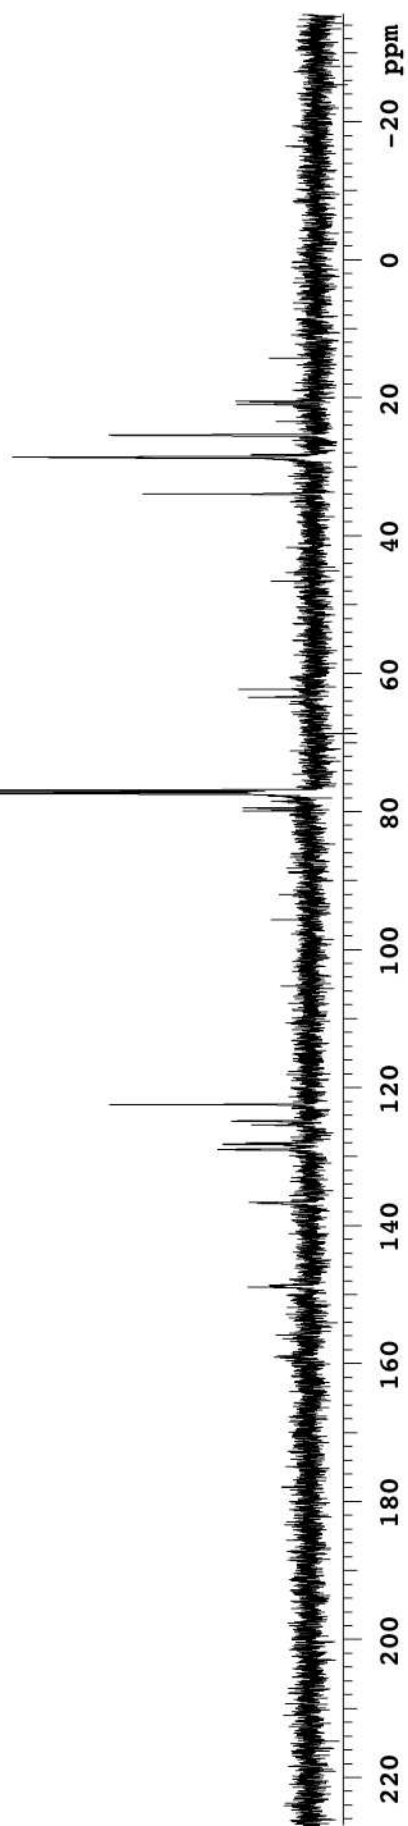

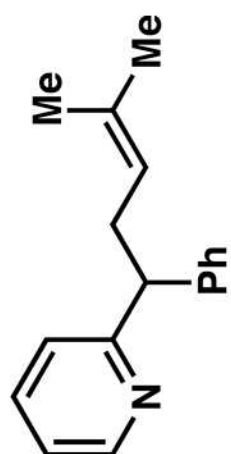

7

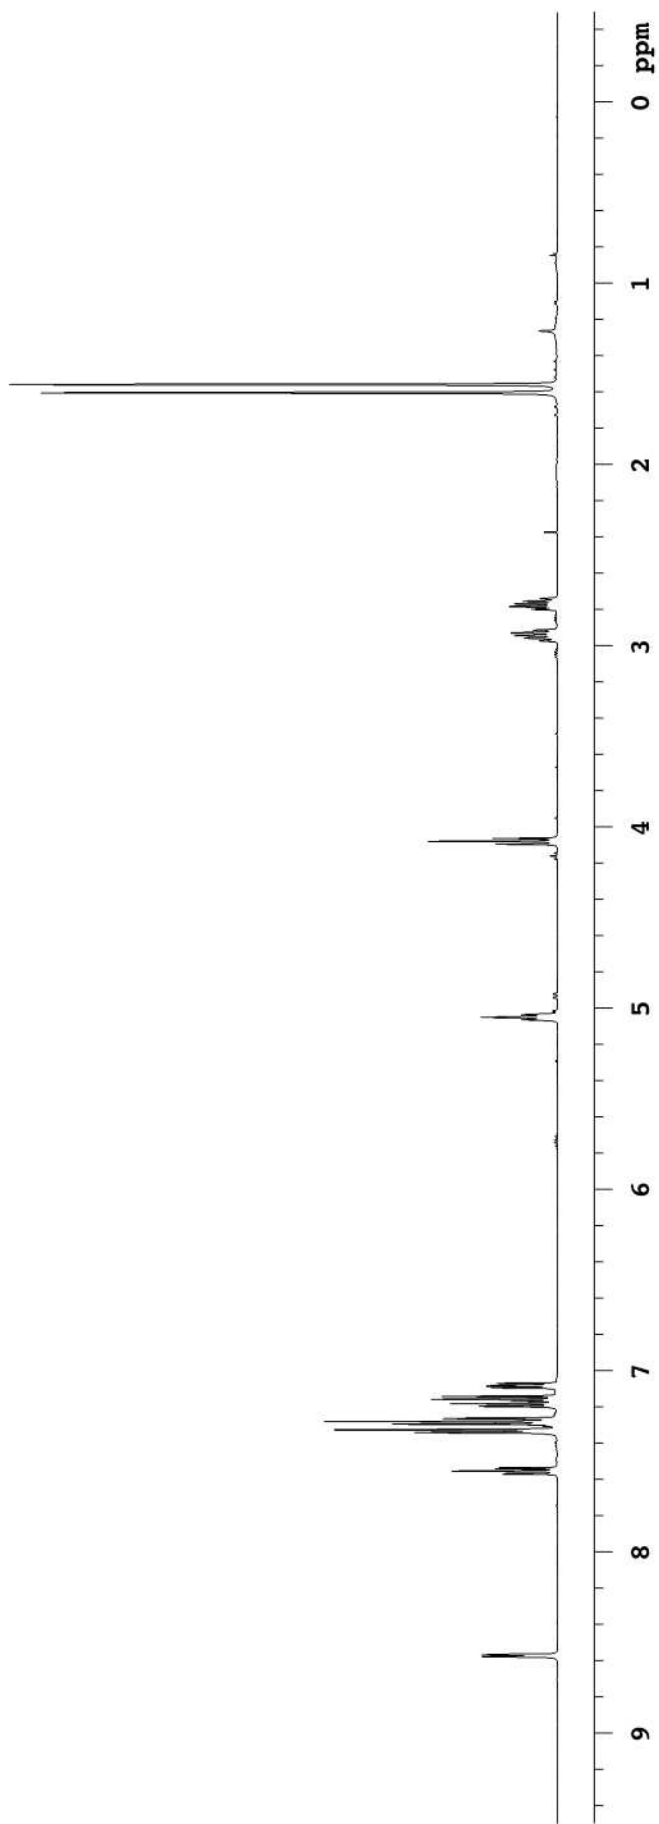

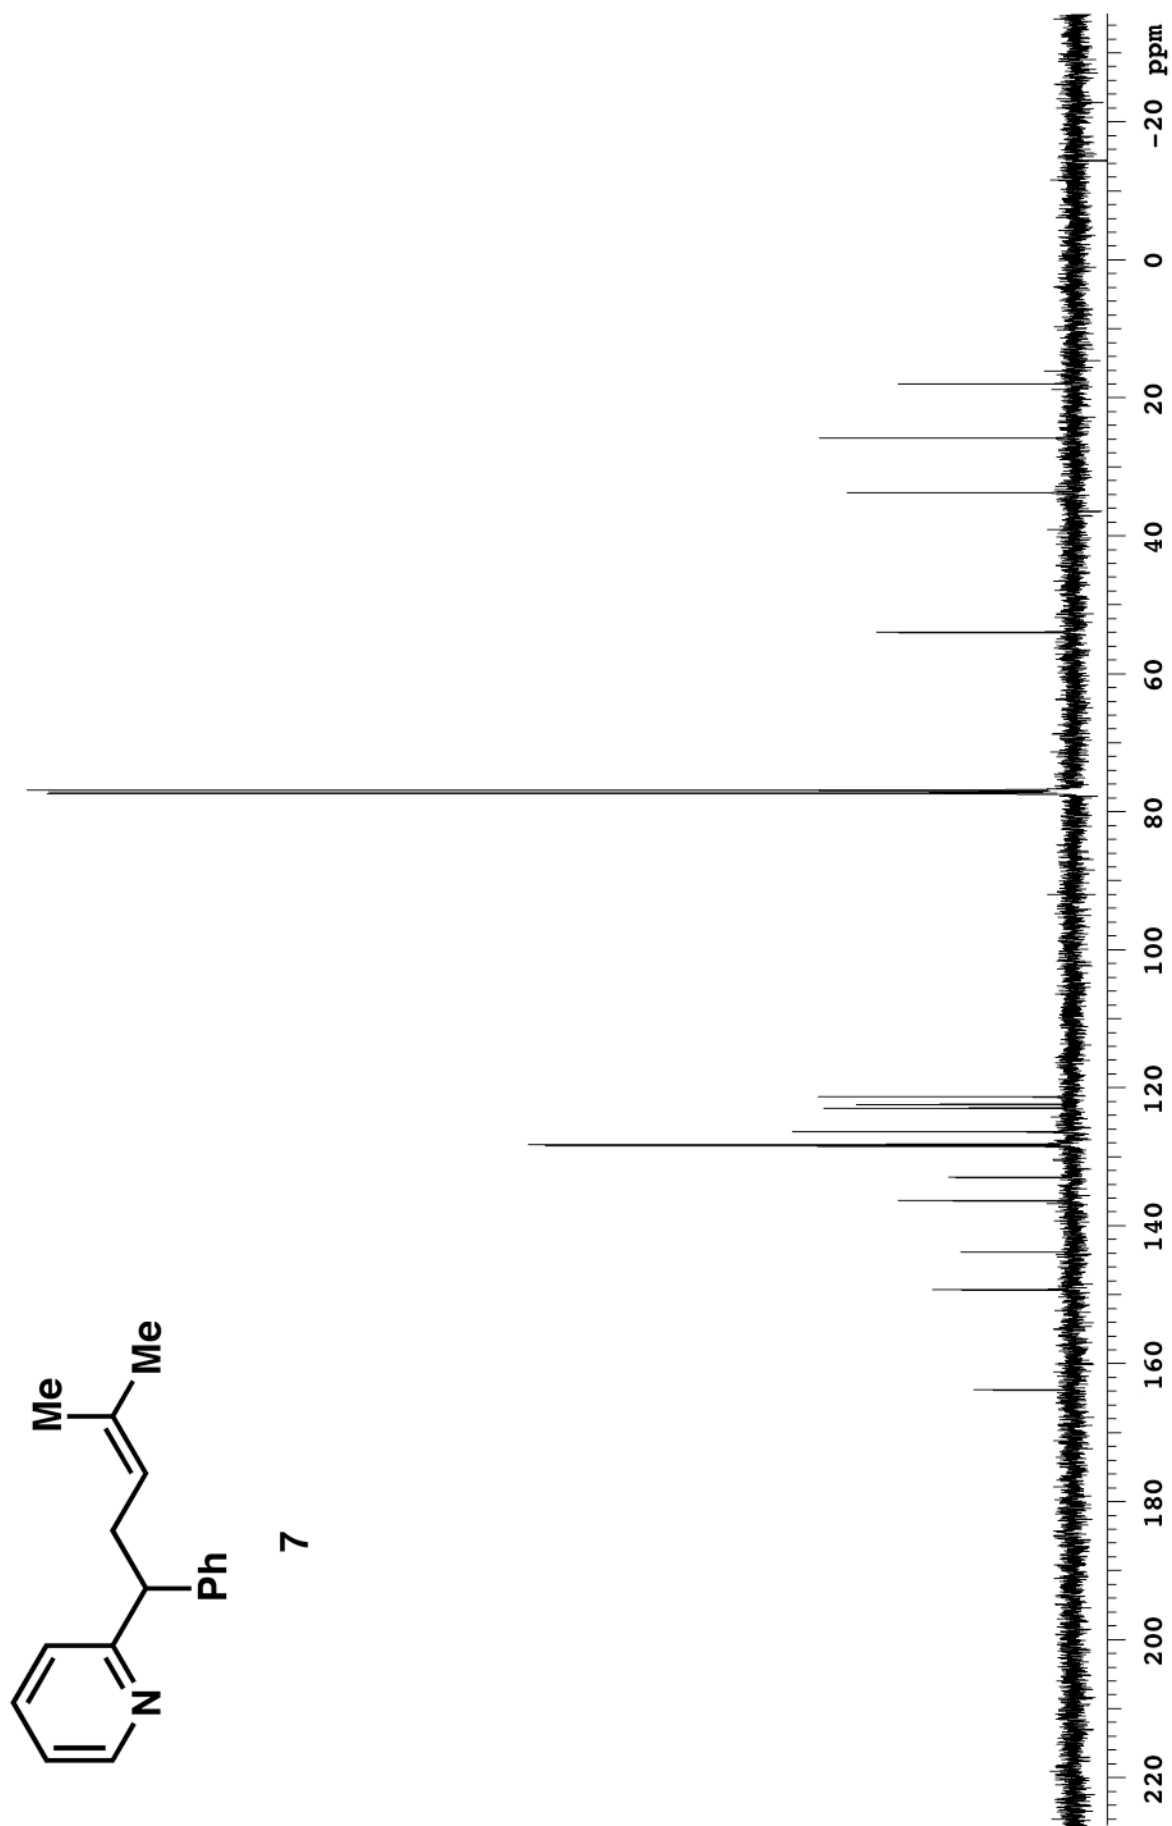

7

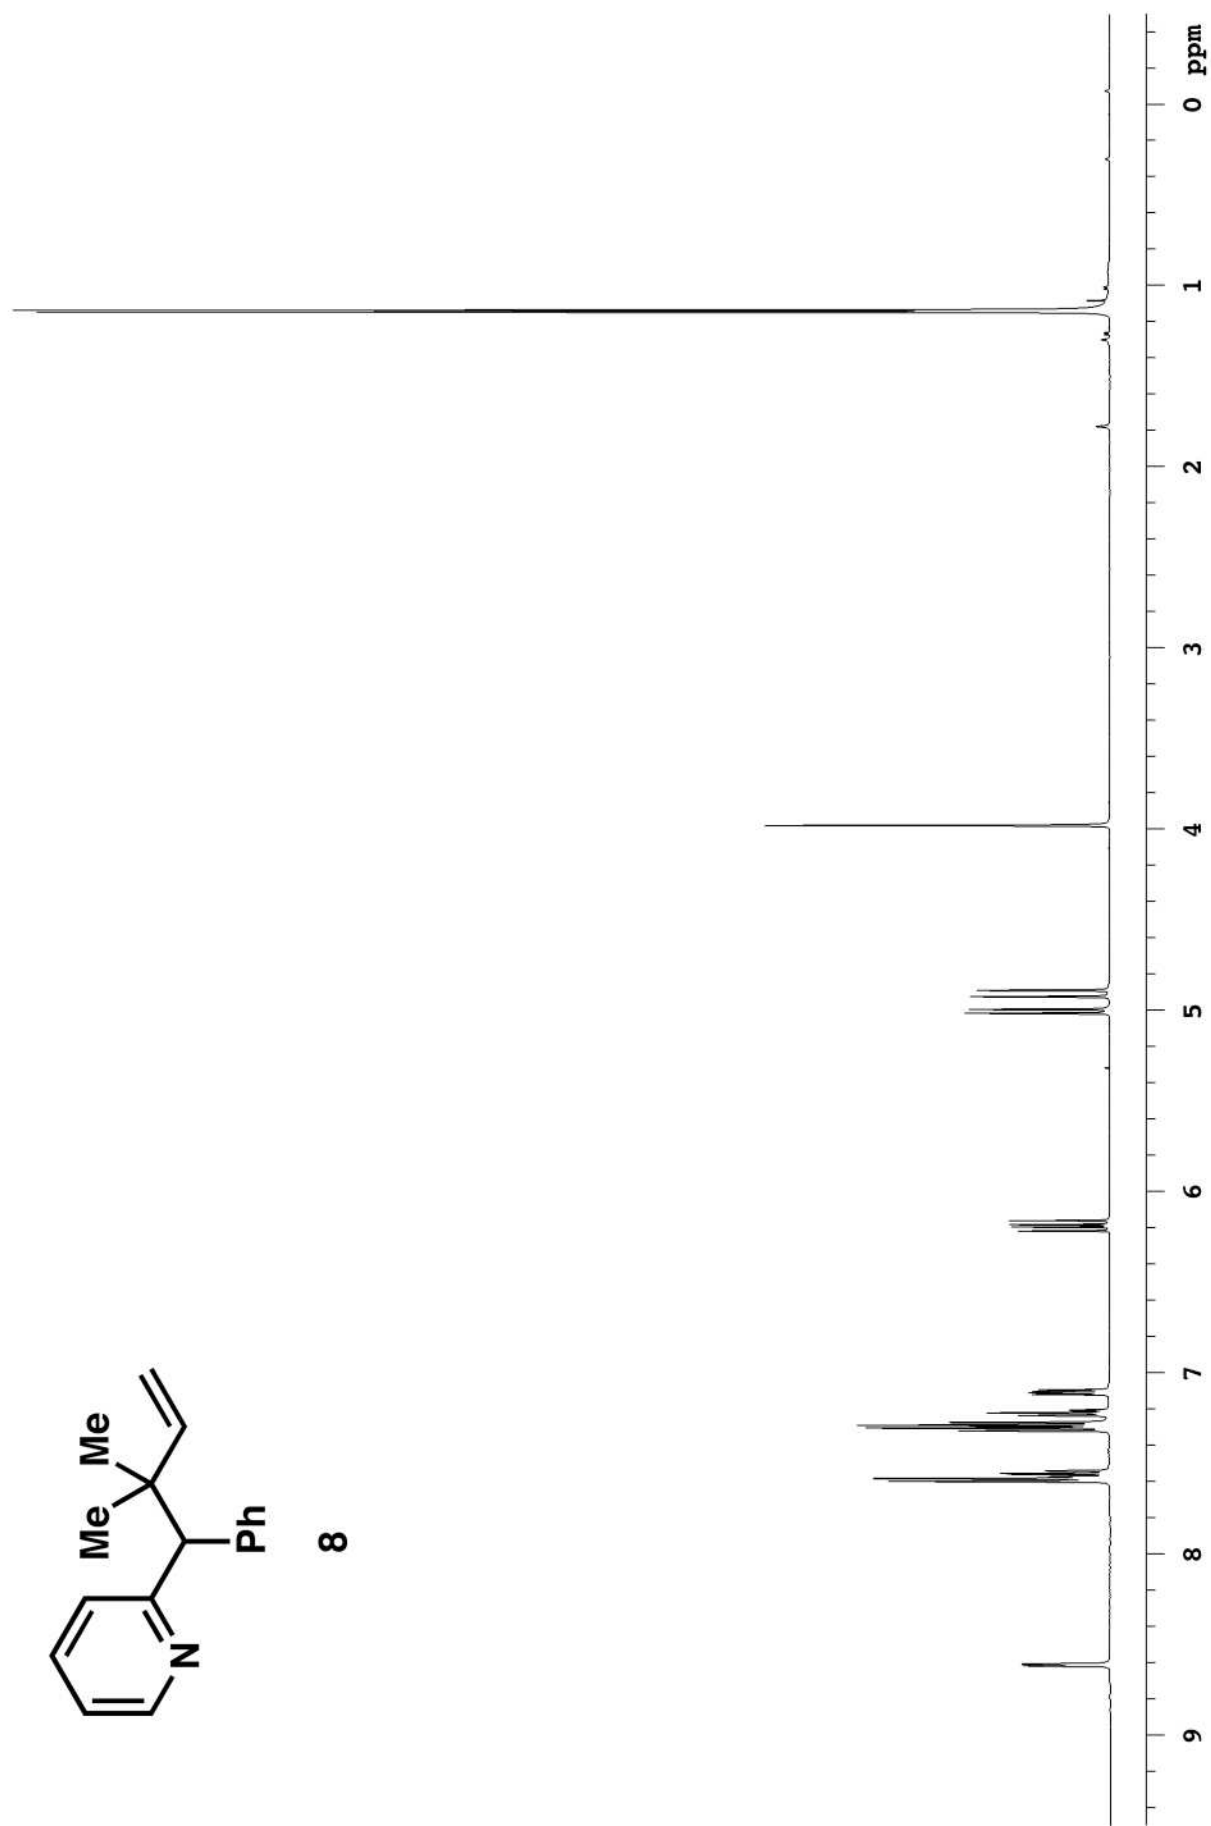



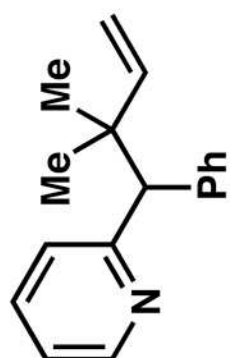

8

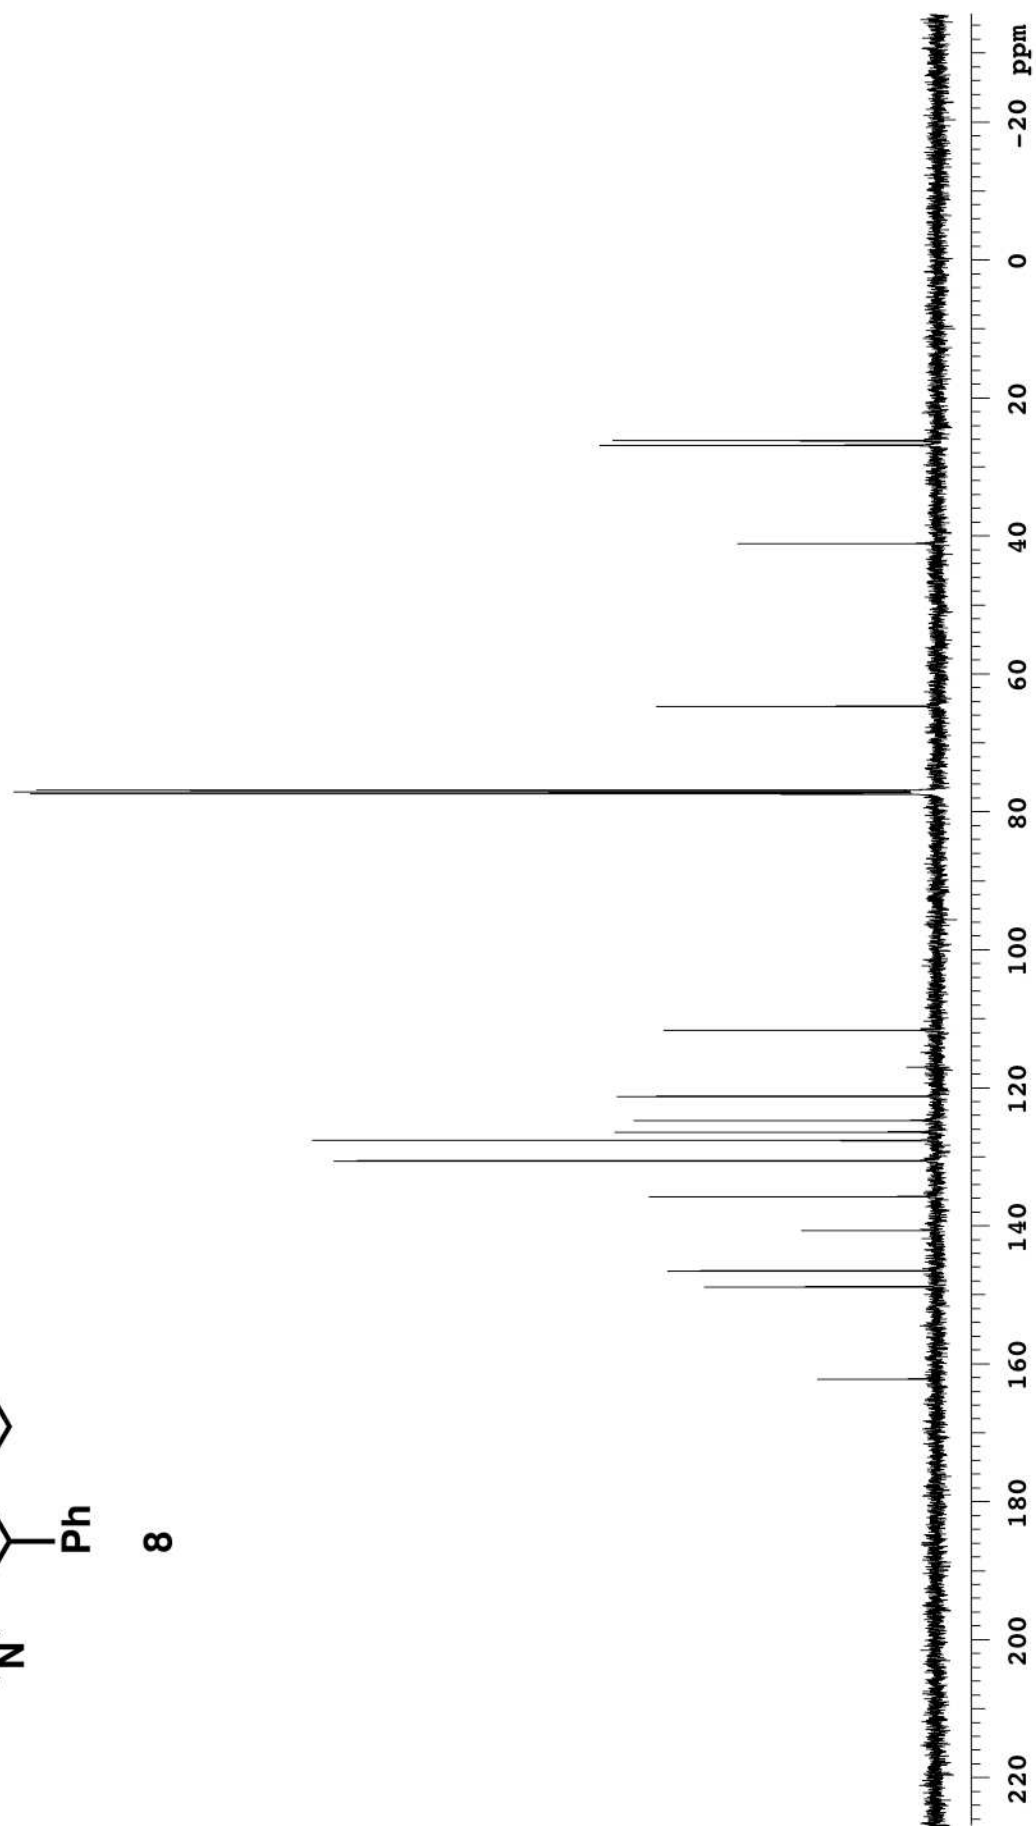

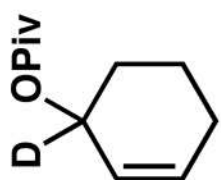

9

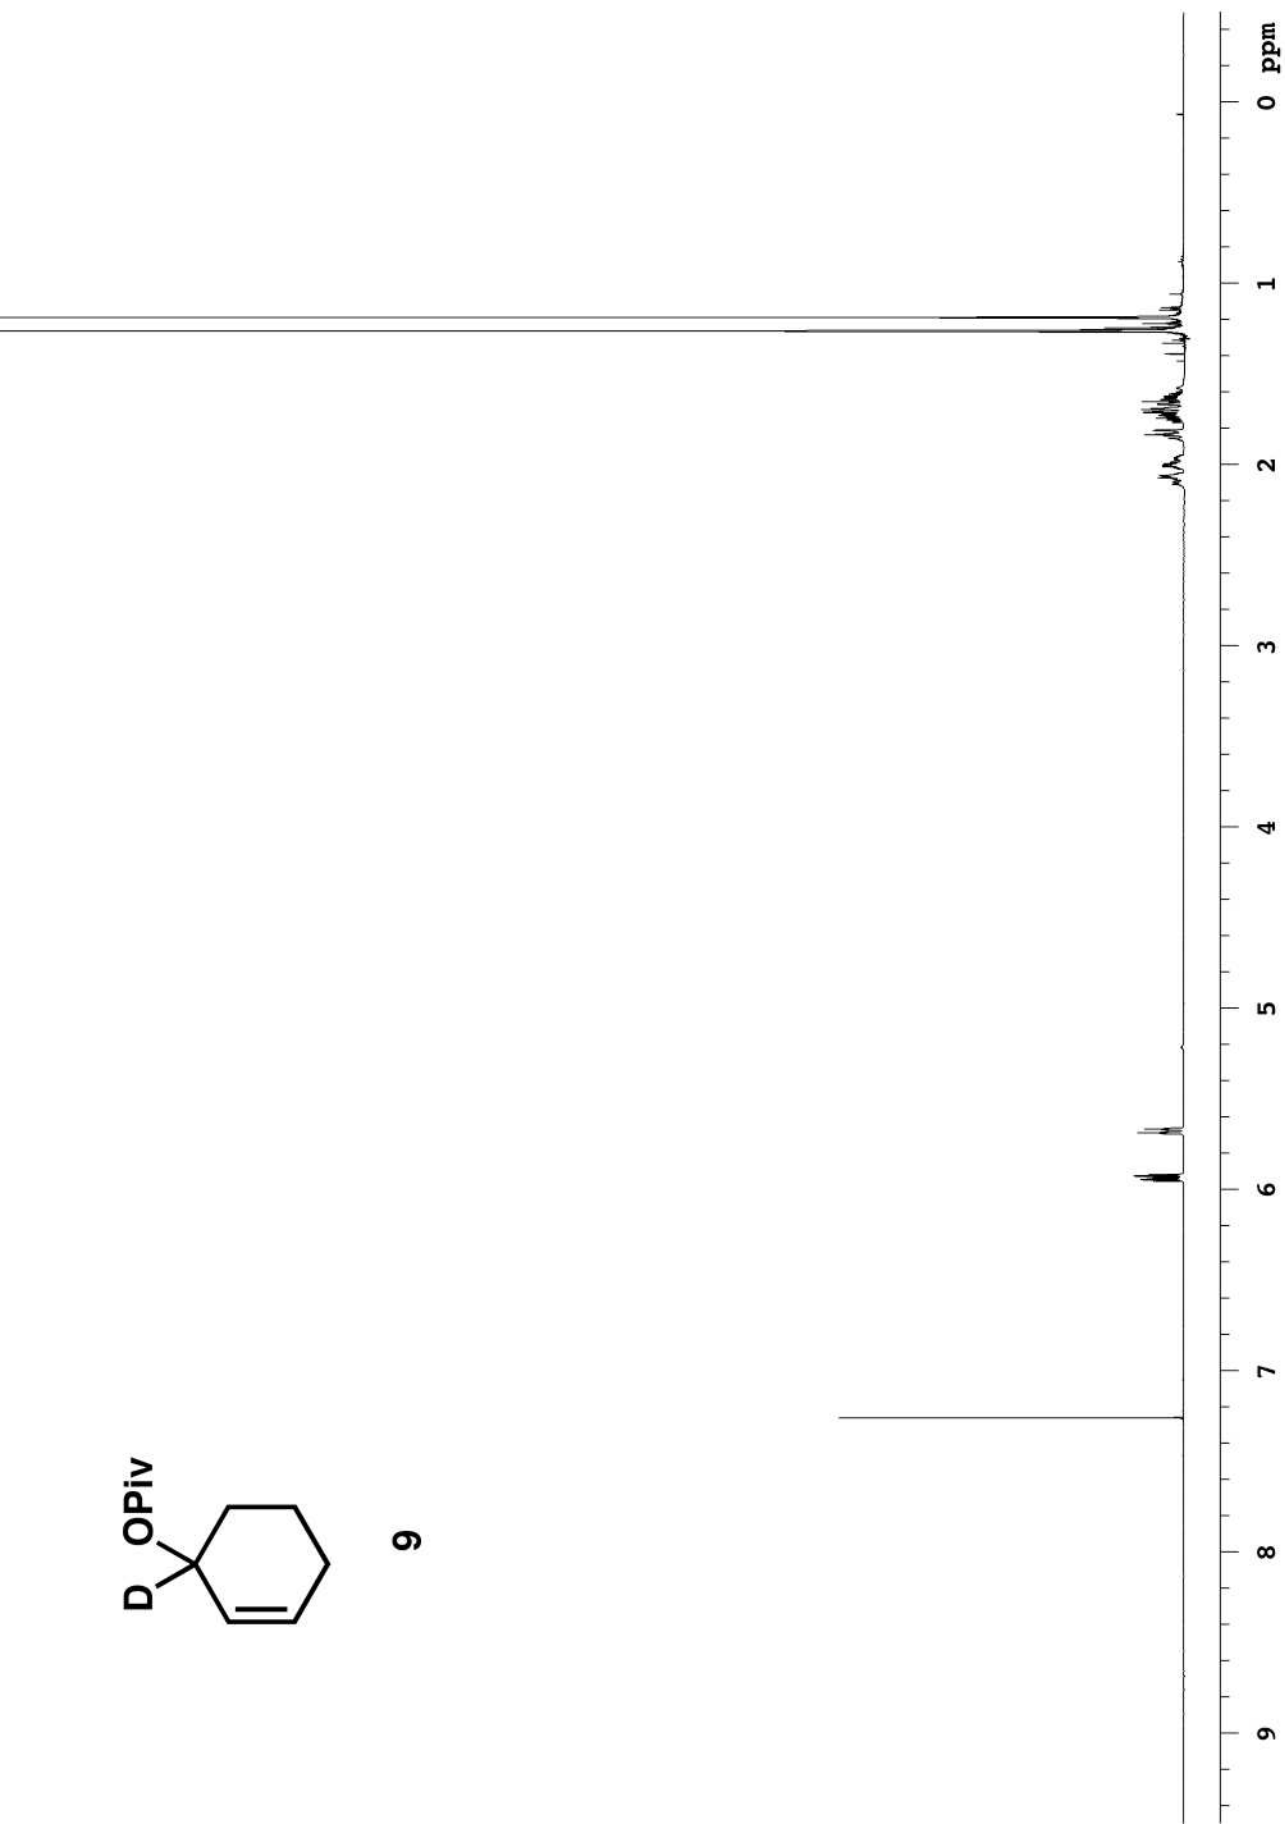

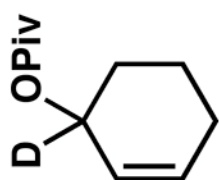

9

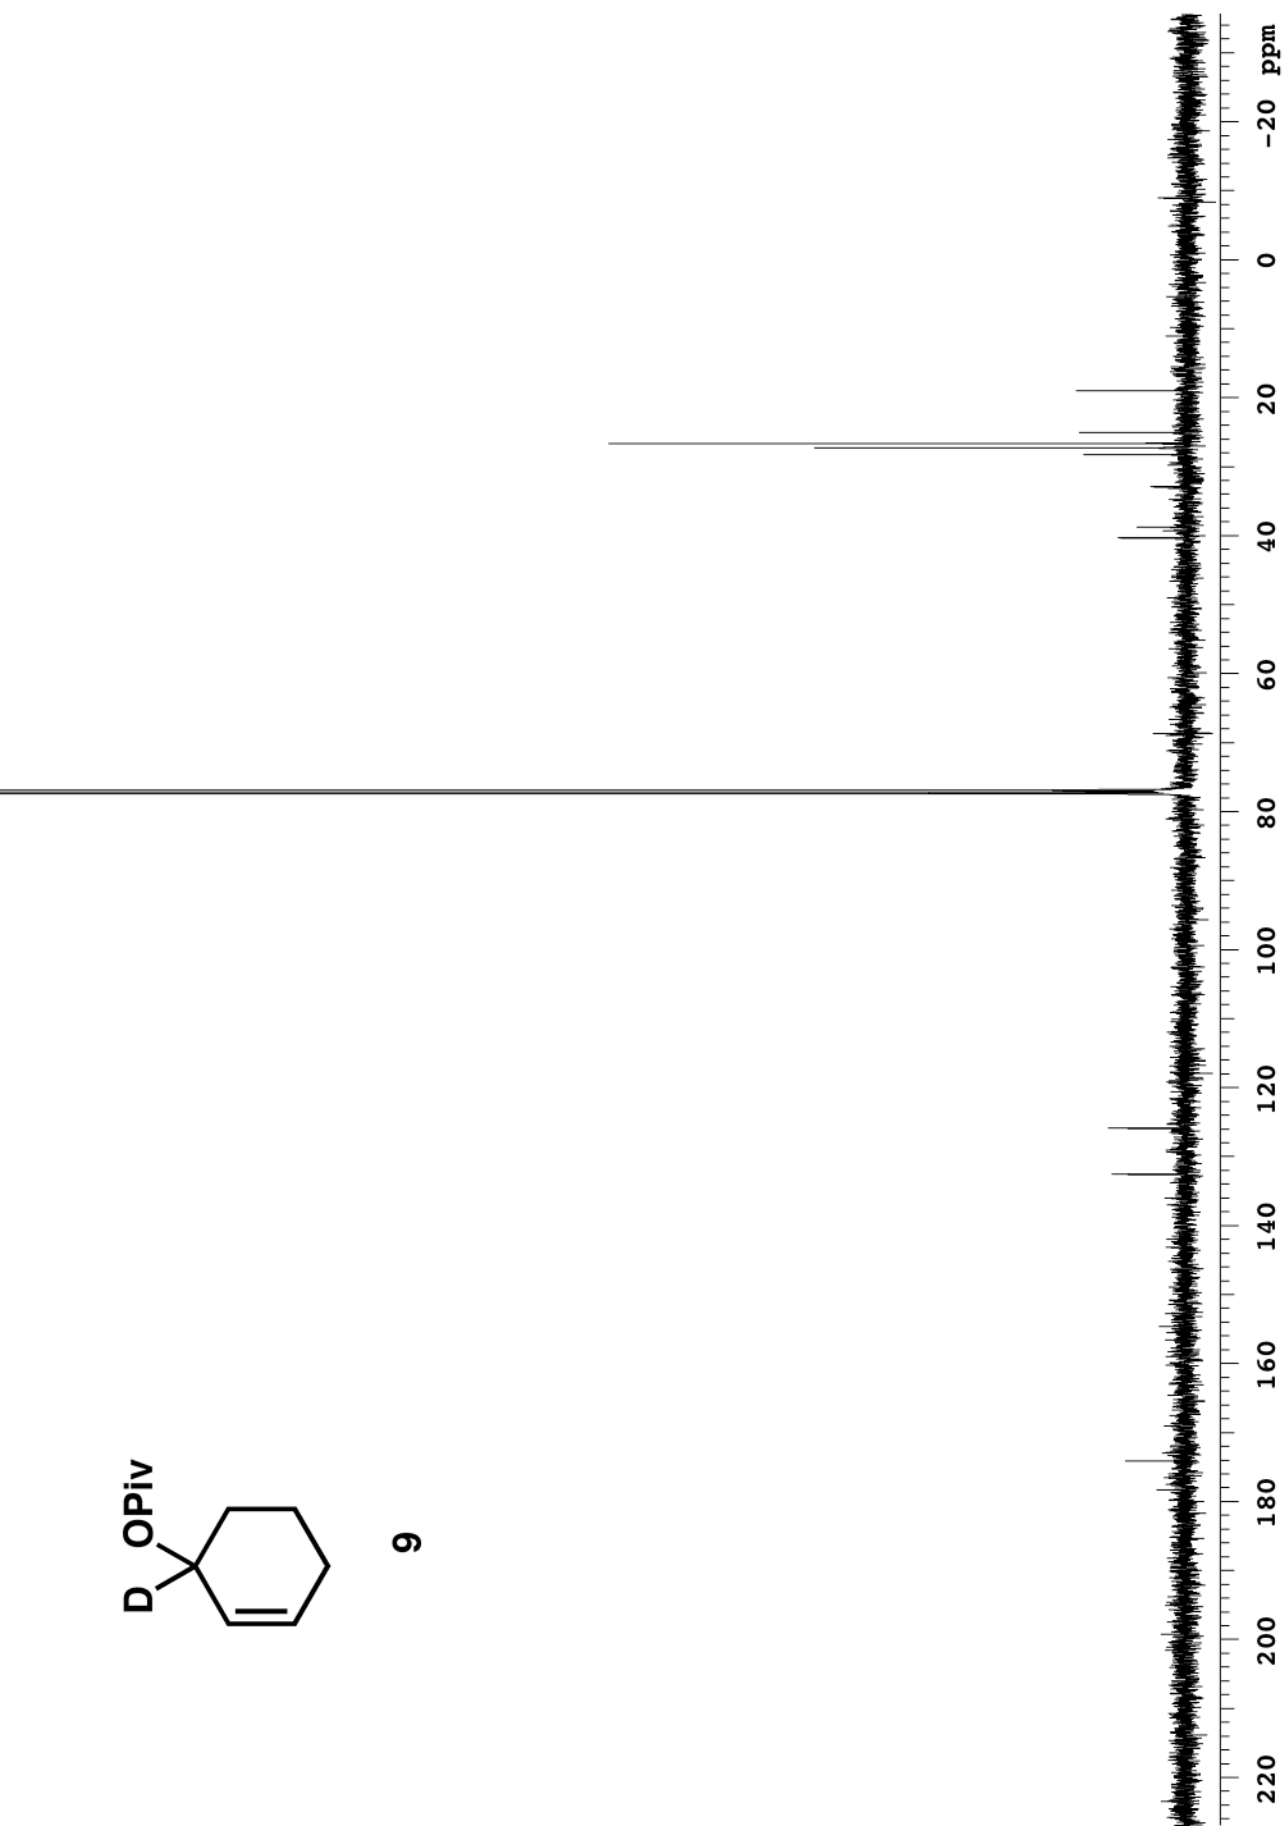

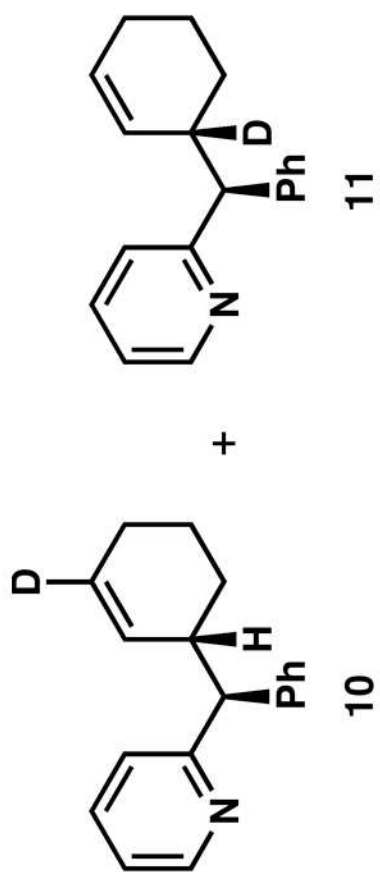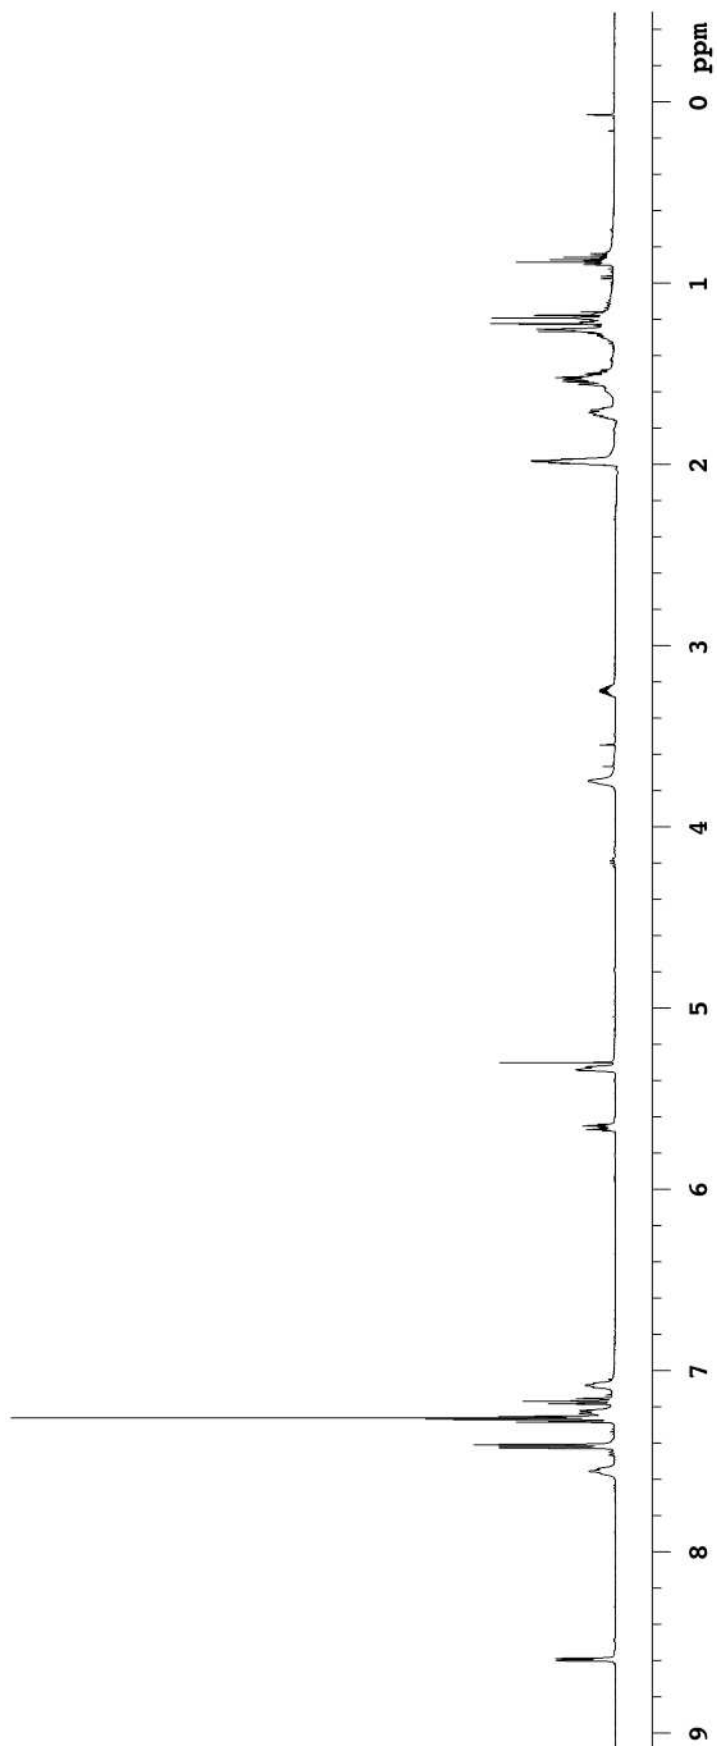

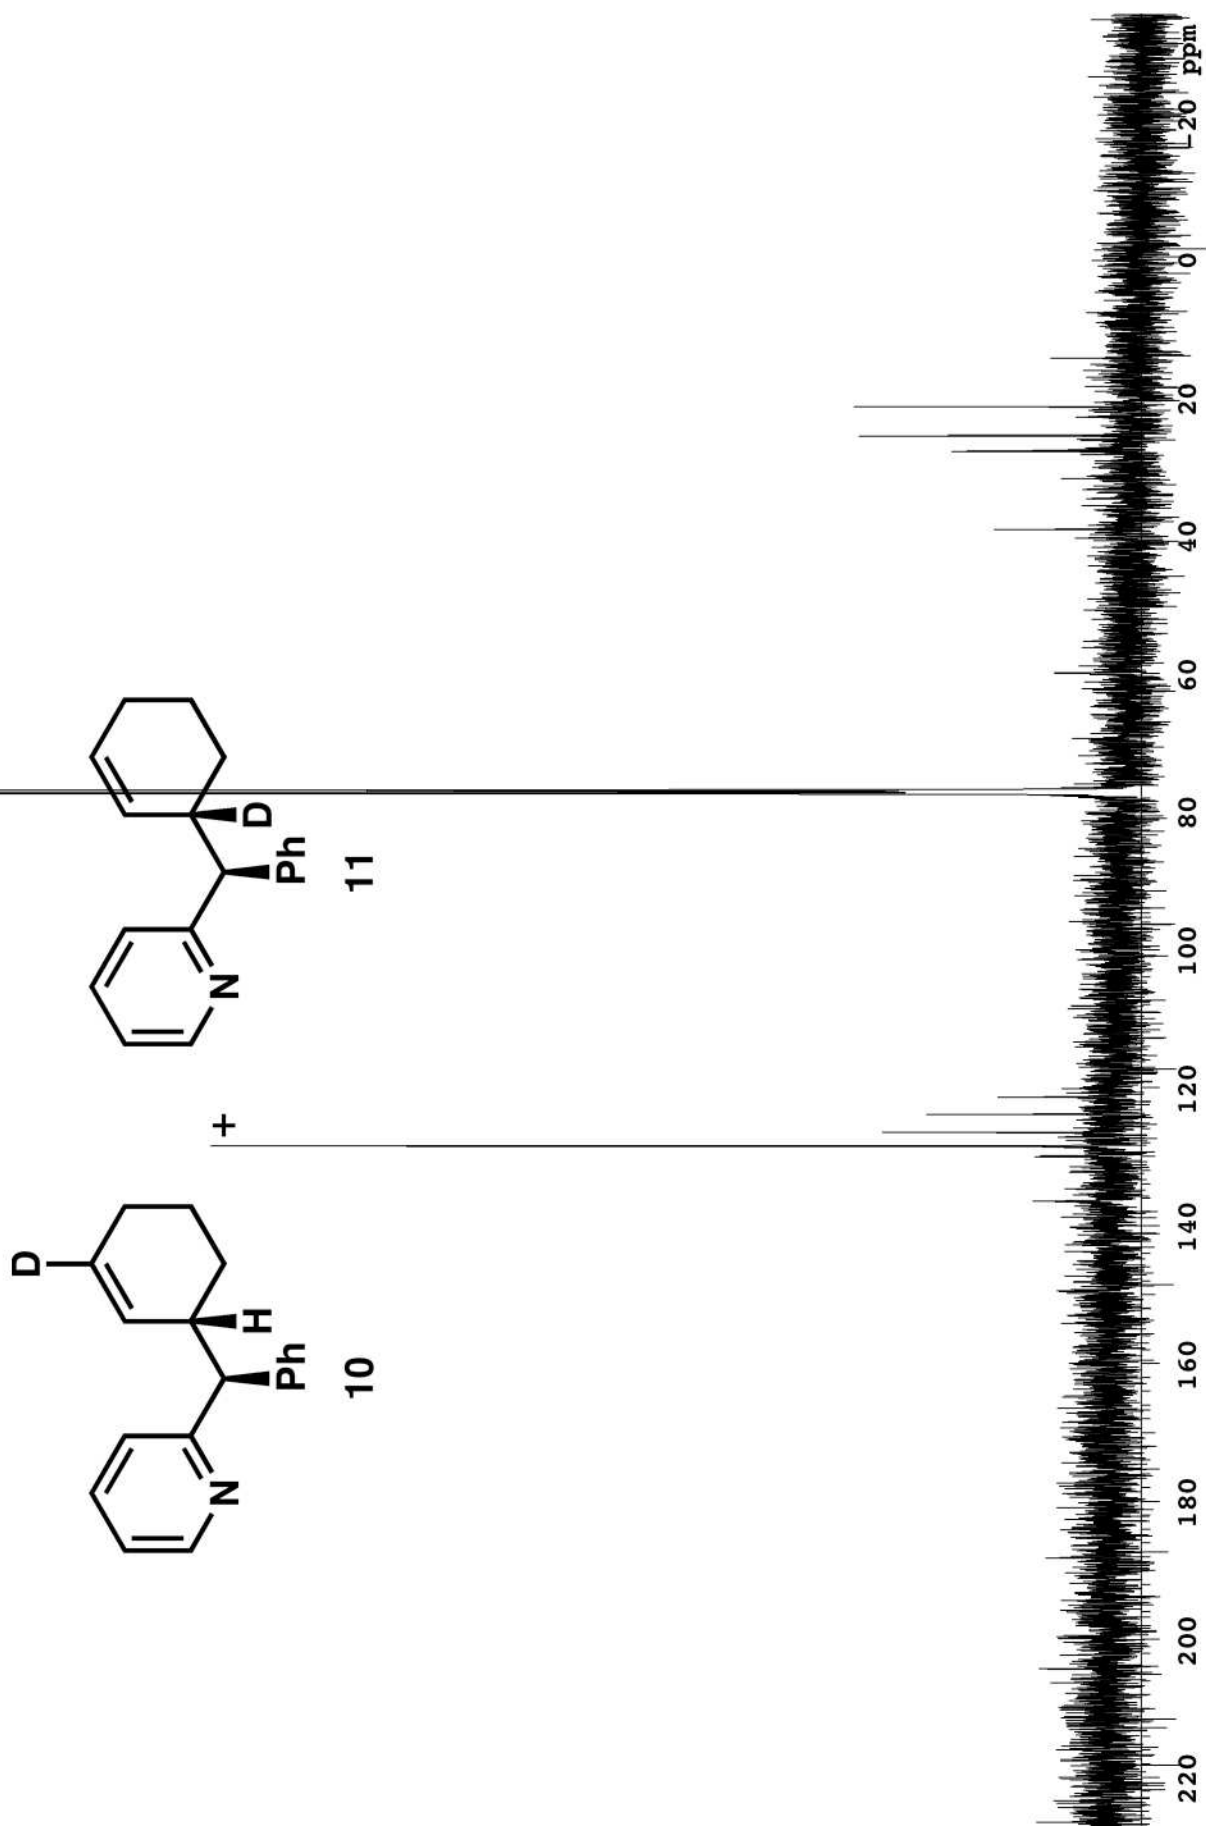

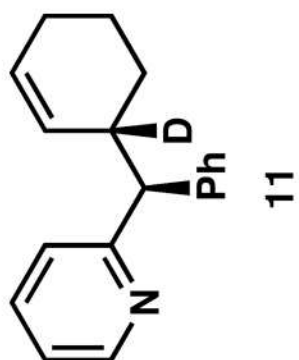

11

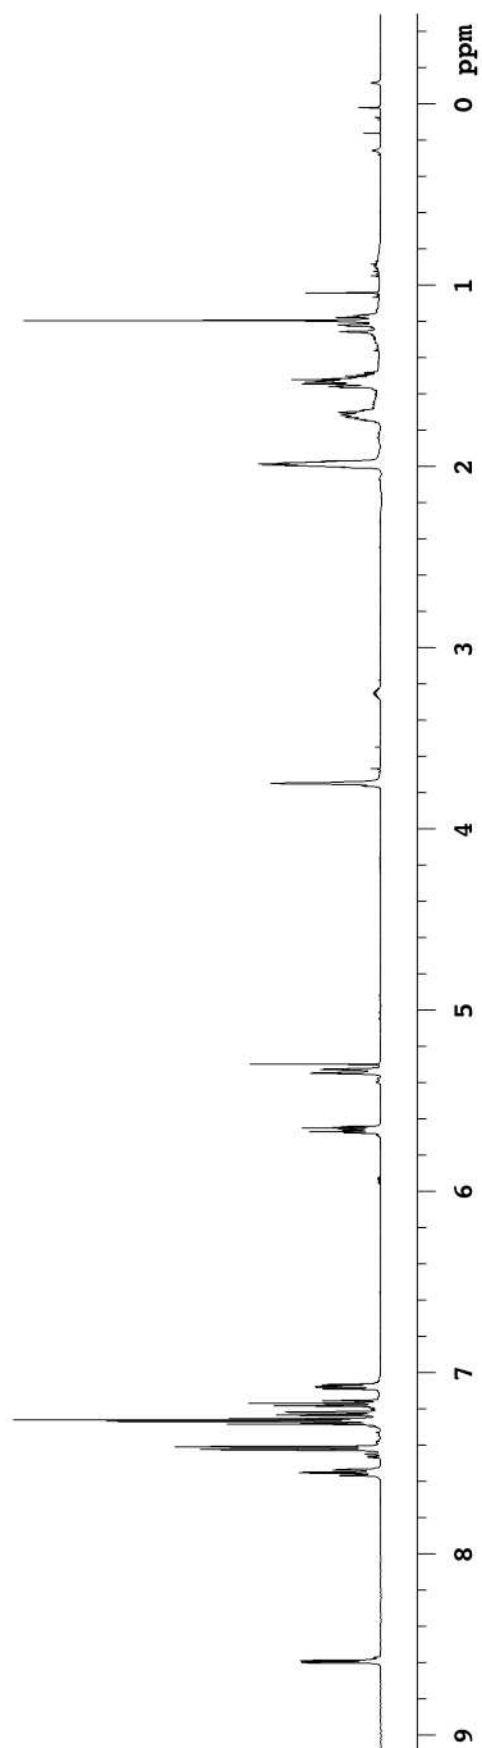

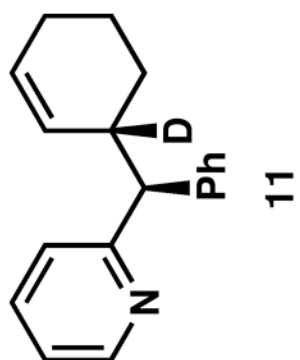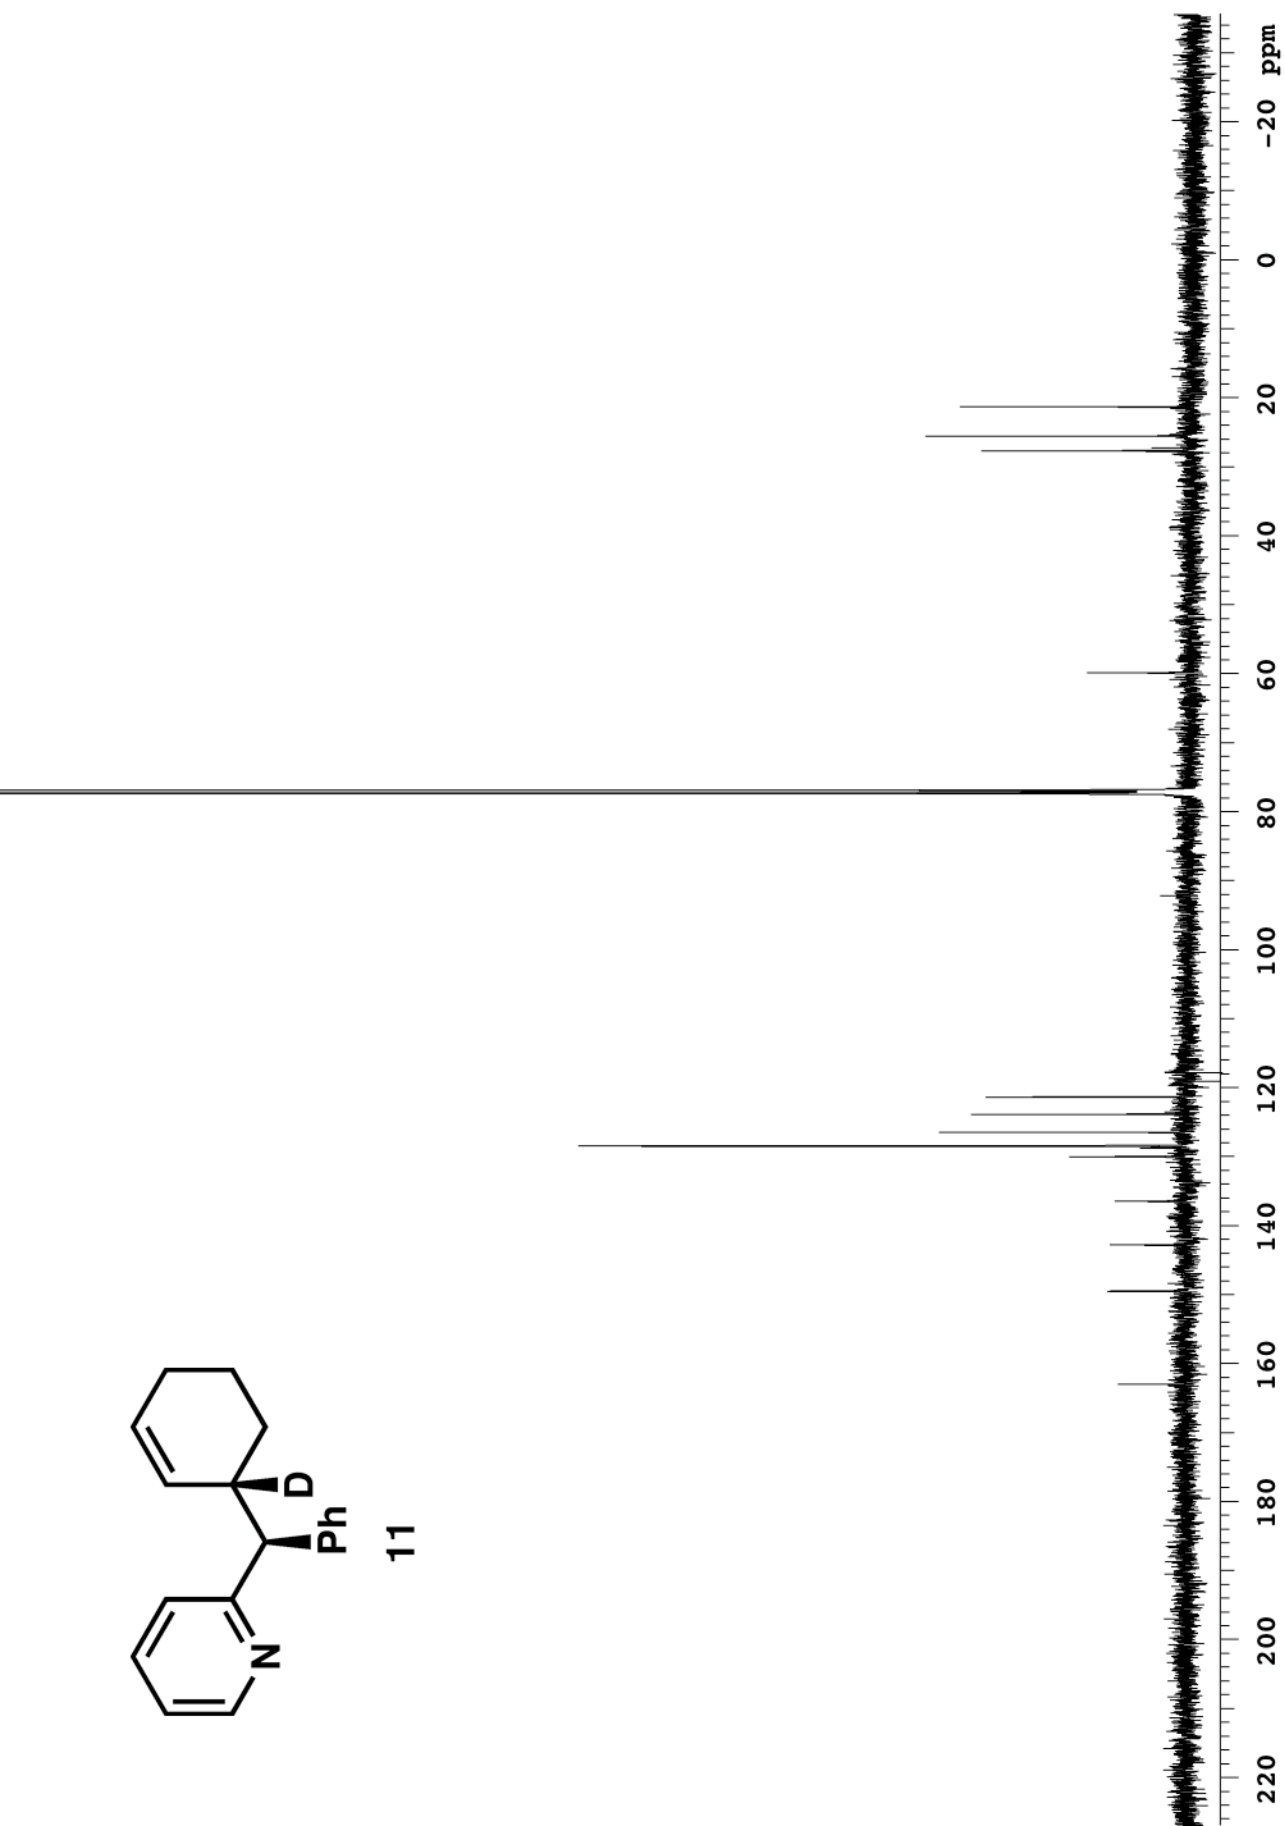

Supplement: NIHMS136602-supplement-2_si_002.pdf [file NIHMS136602-supplement-2_si_002.pdf]
