# Supplementary material
Source: PubMed Central journal article supplement (PMC3235048)
Supplement: NIHMS136602-supplement-1_si_001.pdf [file NIHMS136602-supplement-1_si_001.pdf]

## Supporting Information for

### **Palladium-Catalyzed Regio-, Diastereo-, and Benzylic Allylation of 2-Substituted Pyridines**

Barry M. Trost and David Thaisrivongs

*Department of Chemistry, Stanford University, Stanford, California 94305-5080*

**Material and Methods.** All reactions were performed in flame- or oven-dried glassware with magnetic stirring under a nitrogen or argon atmosphere using freshly distilled solvents. All other commercial reagents were used without purification unless otherwise noted. Air and moisture-sensitive liquids and solutions were transferred via stainless steel syringe or cannula and introduced into the reaction vessel through rubber septa. Reactions conducted below room temperature were cooled by an external bath: dry ice in acetone for  $-78\text{ }^{\circ}\text{C}$  or ice in water for  $0\text{ }^{\circ}\text{C}$ . Thin-layer chromatography was performed on EMD silica gel 60 F<sub>254</sub> plates (0.25 mm); visualization of the developed chromatogram was performed by fluorescence quenching and staining with aqueous ceric ammonium molybdate, *p*-anisaldehyde, or potassium permanganate. Organic solutions were concentrated by rotary evaporation below  $40\text{ }^{\circ}\text{C}$  at *ca.* 25 mm Hg. Chromatographic purification of products was accomplished using forced-flow chromatography on Silicycle silica gel (particle size 0.040-0.063 mm). All isolated and characterized compounds were >95% pure as judged by  $^1\text{H}$  NMR spectroscopic analysis. Optical rotations were measured on a Jasco DIP-1000 digital polarimeter using 5 cm glass cells with a sodium 589 nm filter and are reported as  $[\alpha]_{\text{D}}^{25}$ , concentration (g/100 mL), and solvent. Melting points were determined on a Thomas Hoover Capillary Melting Point Apparatus and are uncorrected.  $^1\text{H}$  and  $^{13}\text{C}$  NMR spectroscopy were performed on a Varian Unity Inova NMR operating at 500 and 125 MHz, respectively. Chemical shifts are reported in ppm relative to residual protio solvent signals; all  $^{13}\text{C}$  NMR spectra are proton decoupled. Data for  $^1\text{H}$  are reported as chemical shift ( $\delta$  ppm), multiplicity (s = singlet, d = doublet, t = triplet, q = quartet, quint = quintet, sext = sextet, sept = septet, oct = octet, m = multiplet, app. = apparent), coupling constant, integration); data for  $^{13}\text{C}$  are reported in terms of chemical shift. Infrared spectroscopic data was recorded on sodium chloride plates as thin films on a Thermo Scientific Nicolet IR100 FT-IR spectrometer. Mass spectrometry data were collected on a Micromass Q-ToF API-US mass spectrometer (Waters Corporation, Milford, MA). Chiral HPLC analysis was performed on a Thermo Separation Products Spectra Series P-100 using Chiralcel® and Chiralpak® columns.

**General Procedure for the Asymmetric Allylic Alkylation of Allylic Pivaloyl Esters with 2-Substituted Pyridyl Nucleophiles.** A reaction vial equipped with a stir bar was charged with the pyridyl nucleophile (0.185 mmol). To a second reaction vial equipped with a stir bar was added  $[(\eta^3\text{-C}_3\text{H}_5)\text{PdCl}]_2$  (1.13 mg, 0.00308 mmol) and (*S,S*)-anthracenyl Trost ligand (6.00 mg, 0.00738 mmol). The vials were sealed, connected with a cannula, and evacuated and filled with Ar three times. Dioxane (degassed by sparging with Ar for 30 min, 0.25 mL) was added to the vial containing the nucleophile, followed by  $\text{BF}_3 \cdot \text{OEt}_2$  (19.7  $\mu\text{L}$ , 0.160 mmol) and additional dioxane (0.25 mL); dioxane (1 mL) was also added to the vial containing the precatalyst mixture. After stirring for 30 min, the allylic pivaloyl ester (0.123 mmol) was added to the reaction followed by LiHMDS (1.0 M in THF, 369  $\mu\text{L}$ , 0.369 mmol). [LiHMDS was prepared by adding *n*-BuLi (2.40 M in hexanes, 833  $\mu\text{L}$ , 2.0 mmol) dropwise to a solution of HMDS (467  $\mu\text{L}$ , 2.20 mmol) in THF (700  $\mu\text{L}$ ) at  $-78^\circ\text{C}$ . After 15 min, the slurry was warmed to  $0^\circ\text{C}$  and stirred for 15 min.] The solution was cooled to  $0^\circ\text{C}$ , *n*-BuLi (2.40 M in hexanes, 61.5  $\mu\text{L}$ , 0.123 mmol) was added dropwise, and the reaction warmed to room temperature. The preformed catalyst was then added via cannula to the mixture and the reaction stirred for 10 h unless otherwise noted. The solution was concentrated in vacuo and the crude material dissolved in 10 mL MeOH, heated to  $55^\circ\text{C}$ , and stirred for 2 h. After cooling to rt,  $\text{Et}_3\text{N}$  (1 mL) was added and the reaction concentrated in vacuo. The crude material was loaded onto silica gel and purified by flash chromatography on silica gel.

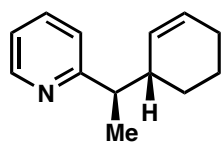

**2-((*R*)-1-((*S*)-cyclohex-2-enyl)ethyl)pyridine (3a).** The reaction was performed with 21.3  $\mu\text{L}$  (0.185 mmol) of 2-ethylpyridine for 33 h. The crude material was purified by flash chromatography on silica gel (pretreated with

2%  $\text{Et}_3\text{N}$  in hexanes; eluted with 1%  $\text{Et}_3\text{N}$  in  $\text{EtOAc}$ :hexanes = 1:19) to give the product (19.7 mg, >19:1 dr, 86% yield) as a colorless oil.  $R_f = 0.45$  (silica gel,  $\text{EtOAc}$ :hexanes = 2:8);  $[\alpha]_D^{25} = -48.7^\circ$  ( $c = 1.00$ ,  $\text{CHCl}_3$ ); IR (thin film)  $\nu_{\text{max}} = 3017, 2929, 1589, 1569, 1473, 1433, 785.8, 748.6, 722.4, 668.7 \text{ cm}^{-1}$ ;  $^1\text{H NMR}$  (500 MHz,  $\text{CDCl}_3$ )  $\delta$  8.55 (dq,  $J = 1.0, 5.0 \text{ Hz}$ , 1H), 7.60 (dt,  $J = 1.5, 7.5 \text{ Hz}$ , 1H), 7.13 (dt,  $J = 0.5, 8.0 \text{ Hz}$ , 1H), 7.10 (dq,  $J = 1.5, 5.0 \text{ Hz}$ , 1H), 5.63 (dq,  $J = 3.0, 10 \text{ Hz}$ , 1H), 5.30 (app.d,  $J = 11 \text{ Hz}$ , 1H), 2.78 (dq,  $J = 7.0, 14 \text{ Hz}$ , 1H), 2.50-2.57 (m, 1H), 1.93-1.97 (m, 2H), 1.71-1.80 (m, 2H), 1.46-1.56 (m, 1H), 1.32-1.37 (m, 1H), 1.28 (d,  $J = 7.0 \text{ Hz}$ , 1H);  $^{13}\text{C NMR}$  (125 MHz,  $\text{CDCl}_3$ )  $\delta$  165.6, 149.1, 136.2, 130.5, 127.8, 122.5, 121.1, 46.89, 40.88, 26.16,

25.33, 21.86, 17.25; HRMS-ESI ( $m/z$ ):  $[M + H]^+$  calcd for  $C_{13}H_{18}N$ , 188.1439; found, 188.1440; Chiral HPLC: Chiralcel® OJ column, isopropanol:heptane = 2:98, 0.80 mL/min,  $\lambda = 254$  nm;  $t_R = 6.45$  (major), 7.21 (minor): 94% ee.

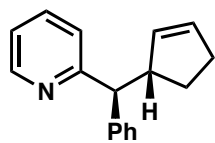

**2-((S)-((S)-cyclopent-2-enyl)(phenyl)methyl)pyridine (3b).** The reaction was performed with 29.7  $\mu$ L (0.185 mmol) of 2-benzylpyridine. The crude material was purified by flash chromatography on silica gel (pretreated with

2%  $Et_3N$  in hexanes; eluted with 1%  $Et_3N$  in EtOAc:hexanes = 1:19) to give the product (27.5 mg, 11:1 dr, 95% yield) as a colorless oil.  $R_f = 0.48$  (silica gel, EtOAc:hexanes = 2:8);  $[\alpha]_D^{25} = -40.6^\circ$  ( $c = 1.00$ ,  $CHCl_3$ ); IR (thin film)  $\nu_{max} = 3056, 3026, 2005, 2927, 2849, 1588, 1569, 1493, 1470, 1453, 1432, 764.2, 746.8, 721.1, 700.2, 641.6, 605.8$   $cm^{-1}$ ;  $^1H$  NMR (500 MHz,  $CDCl_3$ )  $\delta$  8.57 (ddd,  $J = 1.0, 1.5, 4.5$  Hz, 1H), 7.55 (dt,  $J = 2.0, 7.5$  Hz, 1H), 7.42 (dd,  $J = 1.5, 8.5$  Hz, 2H), 7.28 (app.tt,  $J = 1.5, 7.5$  Hz, 2H), 7.18 (app.qt,  $J = 1.0, 7.0$  Hz, 2H), 7.07 (ddd,  $J = 1.0, 4.5, 7.5$  Hz, 1H), 7.75 (dq,  $J = 2.0, 6.0$  Hz, 1H), 5.43 (dq,  $J = 2.0, 6.0$  Hz, 1H), 3.76-3.80 (m, 2H), 2.33-2.41 (m, 1H), 2.25-2.31 (m, 1H), 1.89-2.01 (m, 1H), 1.38-1.52 (m, 1H);  $^{13}C$  NMR (125 MHz,  $CDCl_3$ )  $\delta$  163.6, 149.4, 143.3, 136.4, 133.8, 131.6, 128.44, 128.42, 126.4, 123.1, 121.3, 60.12, 50.15, 31.90, 28.99; HRMS-ESI ( $m/z$ ):  $[M + H]^+$  calcd for  $C_{17}H_{18}N$ , 236.1439; found, 236.1439; Chiral HPLC: Chiralpak® IA column, isopropanol:heptane = 0.1:99.9, 1.0 mL/min,  $\lambda = 254$  nm;  $t_R = 13.1$  (major), 14.4 (minor): 88% ee.

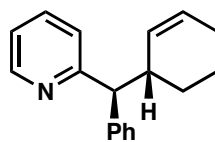

**2-((S)-((S)-cyclohex-2-enyl)(phenyl)methyl)pyridine (3c).** The reaction was performed with 29.7  $\mu$ L (0.185 mmol) of 2-benzylpyridine. The crude material was purified by flash chromatography on silica gel (pretreated with

2%  $Et_3N$  in hexanes; eluted with 1%  $Et_3N$  in EtOAc:hexanes = 1:19) to give the product (30.5 mg, 6:1 dr, 99% yield) as a colorless oil.  $R_f = 0.53$  (silica gel, EtOAc:hexanes = 2:8);  $[\alpha]_D^{25} = +30.0^\circ$  ( $c = 1.00$ ,  $CHCl_3$ ); IR (thin film)  $\nu_{max} = 3023, 2924, 1588, 1569, 1493, 1470, 1452, 1432, 1148, 1050, 994.5, 747.2, 722.9, 700.0, 679.8, 657.7$   $cm^{-1}$ ;  $^1H$  NMR (500 MHz,  $CDCl_3$ )  $\delta$  8.60 (ddd,  $J = 1.0, 1.5, 4.5$  Hz, 1H), 7.55 (dt,  $J = 2.0, 7.5$  Hz, 1H), 7.42 (dd,  $J = 1.0, 8.0$  Hz, 2H), 7.27 (t,  $J = 7.5$  Hz, 2H), 7.22 (d,  $J = 7.5$  Hz, 1H), 7.17 (dt,  $J = 1.0, 7.5$  Hz, 1H), 7.07 (ddd,  $J = 1.0, 5.0, 7.5$  Hz, 1H), 5.66 (dq,  $J = 3.5, 10$  Hz, 1H), 5.35 (dq,  $J = 2.0, 11$  Hz, 1H), 3.75 (d,  $J = 12$  Hz, 1H), 3.23-3.29 (m, 1H), 1.97-2.01 (m, 1H), 1.69-1.75 (m, 1H), 1.48-1.58 (m, 1H), 1.16-1.26 (m,

1H); <sup>13</sup>C NMR (125 MHz, CDCl<sub>3</sub>) δ 162.9, 149.4, 142.7, 136.4, 130.0, 128.4, 128.4, 128.3, 126.4, 123.8, 121.3, 59.92, 39.09, 27.77, 25.51, 21.32; HRMS-ESI (*m/z*): [M + H]<sup>+</sup> calcd for C<sub>18</sub>H<sub>20</sub>N, 250.1596; found, 250.1588; Chiral HPLC: Chiralcel® OD column, isopropanol:heptane = 2:98, 0.80 mL/min, λ = 254 nm; *t<sub>r</sub>* = 10.8 (minor), 11.3 (major): 96% ee.

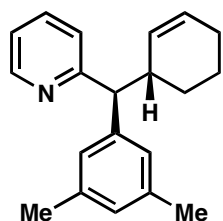

**2-((S)-((S)-cyclohex-2-enyl)(3,5-dimethylphenyl)methyl)pyridine (3d).** The reaction was performed with 36.5 μL (0.185 mmol) of 2-(3,5-dimethylbenzyl)pyridine. The crude material was purified by flash chromatography on silica gel (pretreated with 2% Et<sub>3</sub>N in hexanes; eluted with

1% Et<sub>3</sub>N in EtOAc:hexanes = 1:9) to give the product (34.1 mg, >19:1 dr, 99% yield) as a yellow oil. *R<sub>f</sub>* = 0.51 (silica gel, EtOAc:hexanes = 2:8); [α]<sub>D</sub><sup>25</sup> = +34.4° (*c* = 2.00, CHCl<sub>3</sub>); IR (thin film) *v*<sub>max</sub> = 3019, 2920, 2859, 1588, 1568, 1470, 1447, 1432, 1147, 1048, 994.7, 747.3, 725.4, 706.4, 686.5, 617.4 cm<sup>-1</sup>; <sup>1</sup>H NMR (500 MHz, CDCl<sub>3</sub>) δ 8.59 (dd, *J* = 1.0, 4.5 Hz, 1H), 7.55 (dt, *J* = 2.0, 8.0 Hz, 1H), 7.23 (d, *J* = 8.0 Hz, 1H), 7.07 (dt, *J* = 1.0, 5.0 Hz, 1H), 7.09 (s, 2H), 6.81 (s, 1H), 5.65 (dq, *J* = 3.5, 9.5 Hz, 1H), 5.34 (dd, *J* = 2.0, 10 Hz, 1H), 3.68 (d, *J* = 12 Hz, 1H), 3.19-3.25 (m, 1H), 2.27 (s, 6H), 1.97-2.01 (m, 2H), 1.70-1.76 (m, 1H), 1.49-1.60 (m, 2H), 1.17-1.26 (m, 1H); <sup>13</sup>C NMR (125 MHz, CDCl<sub>3</sub>) δ 163.2, 149.4, 142.6, 137.8, 136.4, 130.2, 128.2, 126.1, 123.7, 121.2, 59.90, 38.89, 27.83, 25.54, 21.36; HRMS-ESI (*m/z*): [M + H]<sup>+</sup> calcd for C<sub>20</sub>H<sub>24</sub>N, 278.1909; found, 278.1903; Chiral HPLC: Chiralcel® AD column, isopropanol:heptane = 2:98, 0.80 mL/min, λ = 254 nm; *t<sub>r</sub>* = 6.23 (major), 7.54 (major): 94% ee.

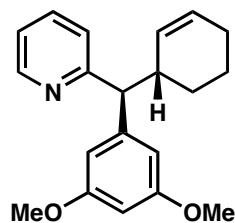

**2-((S)-((S)-cyclohex-2-enyl)(3,5-dimethoxyphenyl)methyl)pyridine (3e).**

The reaction was performed with 42.4 μL (0.185 mmol) 2-(3,5-dimethoxybenzyl)pyridine. The crude material was purified by flash chromatography on silica gel (pretreated with 2% Et<sub>3</sub>N in hexanes; eluted with 1% Et<sub>3</sub>N in EtOAc:hexanes = 1:9) to give the product (36.1 mg, 8:1 dr, 95% yield) as a yellow oil. *R<sub>f</sub>* = 0.30 (silica gel, EtOAc:hexanes = 2:8); [α]<sub>D</sub><sup>25</sup> = +32.5° (*c* = 2.00, CHCl<sub>3</sub>); IR (thin film) *v*<sub>max</sub> = 2932, 2835, 1592, 1466, 1430, 1311, 1203, 1156, 1063, 829.9, 748.6, 700.0 cm<sup>-1</sup>; <sup>1</sup>H NMR (500 MHz, CDCl<sub>3</sub>) δ 8.59 (dt, *J* = 1.0, 5.0 Hz, 1H), 7.55 (dt, *J* = 1.5, 7.5 Hz, 1H), 7.22 (d, *J* = 7.5 Hz, 1H), 7.08 (ddd, *J* = 0.5, 4.5, 8.0 Hz, 1H), 6.60 (d, *J* = 2.0 Hz, 2H), 6.28 (t, *J* = 2.5 Hz, 1H), 5.64 (dq, *J* = 3.5, 10 Hz, 1H), 5.32 (dd, *J* = 2.0, 10 Hz, 1H), 3.76 (s,

6H), 3.68 (d,  $J = 21$  Hz, 1H), 3.18-3.24 (m, 1H), 1.96-2.00 (m, 2H), 1.69-1.76 (m, 1H), 1.57-1.63 (m, 1H), 1.49-1.56 (m, 1H), 1.19-1.27 (m, 1H);  $^{13}\text{C}$  NMR (125 MHz,  $\text{CDCl}_3$ )  $\delta$  162.7, 160.7, 149.4, 145.2, 136.4, 130.0, 128.3, 123.8, 121.4, 106.5, 98.06, 60.10, 55.31, 38.97, 27.68, 25.51, 21.32; HRMS-ESI ( $m/z$ ):  $[\text{M} + \text{Na}]^+$  calcd for  $\text{C}_{20}\text{H}_{23}\text{NO}_2\text{Na}$ , 332.1626; found, 332.1626; Chiral HPLC: Chiralcel® OD column, isopropanol:heptane = 2:98, 0.80 mL/min,  $\lambda = 254$  nm;  $t_R = 7.65$  (major), 9.67 (minor): 98% ee.

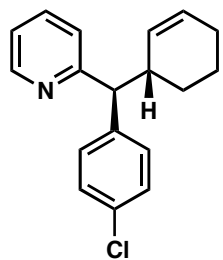

**2-((S)-(4-chlorophenyl))((S)-cyclohex-2-enyl)methylpyridine (3f).** The reaction was performed with 37.8  $\mu\text{L}$  (0.185 mmol) of 2-(4-chlorobenzyl)pyridine. The crude material was purified by flash chromatography on silica gel (pretreated with 2%  $\text{Et}_3\text{N}$  in hexanes; eluted with 1%  $\text{Et}_3\text{N}$  in  $\text{EtOAc}$ :hexanes = 1:19) to give the product (31.0 mg, 15:1 dr, 89%

yield) as a yellow oil.  $R_f = 0.54$  (silica gel,  $\text{EtOAc}$ :hexanes = 2:8);  $[\alpha]_D^{25} = +36.0^\circ$  ( $c = 2.00$ ,  $\text{CHCl}_3$ ); IR (thin film)  $\nu_{\text{max}} = 3021, 2925, 2859, 2835, 1589, 1569, 1488, 1470, 1433, 1409, 1148, 1089, 1049, 1015, 994.6, 875.1, 808.8, 772.0, 747.4, 725.3, 678.5, 652.9, 629.3$   $\text{cm}^{-1}$ ;  $^1\text{H}$  NMR (500 MHz,  $\text{CDCl}_3$ )  $\delta$  8.59 (dq,  $J = 1.0, 5.0$  Hz, 1H), 7.56 (dt,  $J = 2.0, 8.0$  Hz, 1H), 7.37 (d,  $J = 8.5$  Hz, 2H), 7.23 (d,  $J = 8.5$  Hz, 2H), 7.19 (dt,  $J = 1.0, 8.0$  Hz, 1H), 7.09 (ddd,  $J = 1.0, 5.0, 7.5$  Hz, 1H), 5.66 (dq,  $J = 3.5, 9.5$  Hz, 1H), 5.30 (dq,  $J = 2.0, 11$  Hz, 1H), 3.71 (d,  $J = 12$  Hz, 1H), 3.17-3.24 (m, 1H), 1.96-2.01 (m, 2H), 1.68-1.75 (m, 1H), 1.48-1.56 (m, 2H), 1.14-1.21 (m, 1H);  $^{13}\text{C}$  NMR (125 MHz,  $\text{CDCl}_3$ )  $\delta$  162.4, 149.6, 141.2, 136.5, 132.2, 129.7, 128.5, 123.8, 121.5, 59.23, 39.20, 27.71, 25.47, 21.28; HRMS-ESI ( $m/z$ ):  $[\text{M} + \text{H}]^+$  calcd for  $\text{C}_{18}\text{H}_{19}\text{NCl}$ , 284.1206; found, 284.1194; Chiral HPLC: Chiralcel® AD column, isopropanol:heptane = 2:98, 1.0 mL/min,  $\lambda = 254$  nm;  $t_R = 31.6$  (minor), 39.7 (minor): 96% ee.

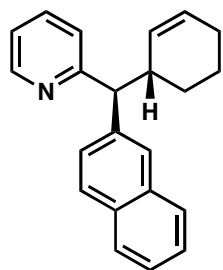

**2-((S)-((S)-cyclohex-2-enyl)(naphthalen-2-yl)methyl)pyridine (3g).** The reaction was performed with 40.6  $\mu\text{L}$  (0.185 mmol) of 2-(naphthalen-2-ylmethyl)pyridine. The crude material was purified by flash chromatography on silica gel (pretreated with 2%  $\text{Et}_3\text{N}$  in hexanes; eluted with 1%  $\text{Et}_3\text{N}$  in  $\text{EtOAc}$ :hexanes = 1:19) to give the product (33.3 mg, 12:1 dr, 90% yield) as a

yellow oil.  $R_f = 0.55$  (silica gel,  $\text{EtOAc}$ :hexanes = 2:8);  $[\alpha]_D^{25} = +62.3^\circ$  ( $c = 2.00$ ,  $\text{CHCl}_3$ ); IR (thin film)  $\nu_{\text{max}} = 3055, 3019, 2924, 2858, 2835, 1588, 1568, 1507, 1471, 1432, 1148, 994.6,$

906.5, 814.2, 746.7, 680.7  $\text{cm}^{-1}$ ;  $^1\text{H}$  NMR (500 MHz,  $\text{CDCl}_3$ )  $\delta$  8.62 (dq,  $J = 1.0, 5.0$  Hz, 1H), 7.83 (s, 1H), 7.75-7.81 (m, 2H), 7.63 (dd,  $J = 2.0, 8.5$  Hz, 1H), 7.55 (dt,  $J = 2.0, 8.0$  Hz, 1H), 7.39-7.45 (m, 3H), 7.29 (dt,  $J = 1.0, 8.0$  Hz, 1H), 7.08 (ddd,  $J = 1.0, 5.0, 7.5$  Hz, 1H), 5.69 (dq,  $J = 3.5, 9.5$  Hz, 1H), 5.42 (dq,  $J = 2.0, 10$  Hz, 1H), 3.93 (d,  $J = 12$  Hz, 1H), 3.63-3.42 (m, 1H), 1.99-2.03 (m, 2H), 1.69-1.76 (m, 1H), 1.49-1.59 (m, 2H), 1.21-1.28 (m, 1H);  $^{13}\text{C}$  NMR (125 MHz,  $\text{CDCl}_3$ )  $\delta$  162.85, 149.54, 140.3, 136.4, 133.6, 132.4, 130.1, 128.4, 128.1, 127.8, 127.6, 126.9, 126.5, 125.9, 125.4, 123.9, 121.3, 60.06, 38.89, 27.85, 25.53, 21.33; HRMS-ESI ( $m/z$ ):  $[\text{M} + \text{H}]^+$  calcd for  $\text{C}_{22}\text{H}_{22}\text{N}$ , 300.1752; found, 300.1748; Chiral HPLC: Chiralcel  $\text{\textcircled{R}}$  OD column, isopropanol:heptane = 0.5:99.5, 1.0 mL/min,  $\lambda = 254$  nm;  $t_r = 23.87$  (major), 30.33 (minor): 98% ee.

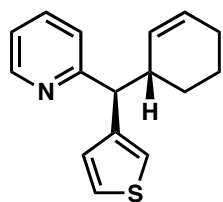

**2-((S)-((S)-cyclohex-2-enyl)(thiophen-3-yl)methyl)pyridine (3h).** The reaction was performed with 32.4  $\mu\text{L}$  (0.185 mmol) of 2-(thiophen-3-ylmethyl)pyridine. The crude material was purified by flash chromatography on silica gel (pretreated with 2%  $\text{Et}_3\text{N}$  in hexanes; eluted with 1%  $\text{Et}_3\text{N}$  in

$\text{EtOAc}$ :hexanes = 1:19) to give the product (20.7 mg, >19:1 dr, 66% yield) as a yellow oil.  $R_f = 0.55$  (silica gel,  $\text{EtOAc}$ :hexanes = 2:8);  $[\alpha]_D^{25} = +21.6^\circ$  ( $c = 1.00$ ,  $\text{CHCl}_3$ ); IR (thin film)  $\nu_{\text{max}} = 3019, 2924, 2857, 1588, 1569, 1470, 1432, 1411, 1148, 1050, 994.0, 839.1, 772.4, 747.3, 726.3, 705.7, 669.5$   $\text{cm}^{-1}$ ;  $^1\text{H}$  NMR (500 MHz,  $\text{CDCl}_3$ )  $\delta$  8.59 (d,  $J = 5.0$  Hz, 1H), 7.57 (dt,  $J = 2.0, 7.5$  Hz, 1H), 7.20-7.26 (m, 2H), 7.14-7.16 (m, 2H), 7.09 (dd,  $J = 5.0, 6.8$  Hz, 1H), 5.64 (dq,  $J = 3.5, 10$  Hz, 1H), 5.29 (dd,  $J = 2.5, 10$  Hz, 1H), 3.92 (d,  $J = 11$  Hz, 1H), 3.10-3.16 (m, 1H), 1.96-2.00 (m, 2H), 1.69-1.76 (m, 1H), 1.57-1.65 (m, 1H), 1.49-1.57 (m, 1H), 1.19-1.30 (m, 1H);  $^{13}\text{C}$  NMR (125 MHz,  $\text{CDCl}_3$ )  $\delta$  162.7, 149.5, 143.4, 136.4, 129.7, 128.4, 127.7, 125.3, 123.6, 121.4, 121.1, 92.06, 68.61, 55.21, 39.72, 27.75, 25.48, 21.30; HRMS-ESI ( $m/z$ ):  $[\text{M} + \text{H}]^+$  calcd for  $\text{C}_{16}\text{H}_{18}\text{NS}$ , 256.1160; found, 256.1159; Chiral HPLC: Chiralcel  $\text{\textcircled{R}}$  AD column, isopropanol:heptane = 0.5:99.5, 1.0 mL/min,  $\lambda = 254$  nm;  $t_r = 19.22$  (major), 21.39 (minor): 99% ee.

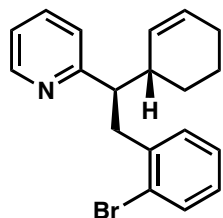

**2-((R)-2-(2-bromophenyl)-1-((S)-cyclohex-2-enyl)ethyl)pyridine (3i).** The reaction was performed with 48.5  $\mu\text{L}$  (0.185 mmol) of 2-(2-bromophenethyl)pyridine. The crude material was purified by flash chromatography on silica gel (pretreated with 2%  $\text{Et}_3\text{N}$  in hexanes; eluted with

1% Et<sub>3</sub>N in EtOAc:hexanes = 1:9) to give the product (38.0 mg, 4:1 dr, 90% yield) as a colorless oil.  $R_f$  = 0.39 (silica gel, EtOAc:hexanes = 2:8);  $[\alpha]_D^{25} = +57.7^\circ$  ( $c = 1.00$ , CHCl<sub>3</sub>); IR (thin film)  $\nu_{\max} = 3019, 2928, 2858, 1674, 1589, 1568, 1471, 1435, 1148, 1048, 1024, 995.3, 748.2, 722.9, 700.0, 658.8$  cm<sup>-1</sup>; <sup>1</sup>H NMR (500 MHz, CDCl<sub>3</sub>)  $\delta$  8.59 (app.dq,  $J = 1.0, 4.5$  Hz, 1H), 7.44 (ddd,  $J = 2.0, 3.0, 4.0$  Hz, 1H), 7.38 (dt,  $J = 2.0, 7.5$  Hz, 1H), 7.03 (ddd,  $J = 1.5, 5.0, 7.5$  Hz, 1H), 6.88-6.95 (m, 2H), 6.75 (dt,  $J = 1.0, 8.0$  Hz, 1H), 6.62-6.64 (m, 1H), 5.63 (dq,  $J = 2.5, 10$  Hz, 1H), 5.28-5.31 (m, 1H), 3.41 (dd,  $J = 3.5, 13$  Hz, 1H), 2.72-2.77 (m, 2H), 3.02-3.18 (m, 2H), 1.94-2.00 (m, 2H), 1.79-1.85 (m, 1H), 1.52-1.66 (m, 2H); <sup>13</sup>C NMR (125 MHz, CDCl<sub>3</sub>)  $\delta$  162.7, 149.2, 140.1, 135.7, 132.6, 131.5, 130.0, 129.0, 127.4, 126.7, 124.8, 124.6, 121.3, 52.53, 40.04, 38.68, 26.96, 25.39, 21.78; HRMS-ESI ( $m/z$ ):  $[M + H]^+$  calcd for C<sub>19</sub>H<sub>21</sub>NBr, 342.0857; found, 342.0846; Chiral HPLC: Chiralcel® OD column, isopropanol:heptane = 2:98, 0.80 mL/min,  $\lambda = 254$  nm;  $t_R = 7.65$  (major), 9.67 (minor): 98% ee.

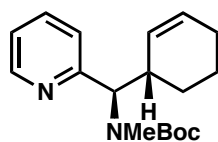

**tert-butyl (R)-((S)-cyclohex-2-enyl)(pyridin-2-yl)methyl(methyl)carbamate (3j).** The reaction was performed with 41.1  $\mu$ L (0.185 mmol) of *tert*-butyl methyl(pyridin-2-ylmethyl)carbamate. The crude material was purified

by flash chromatography on silica gel (pretreated with 2% Et<sub>3</sub>N in hexanes; eluted with 1% Et<sub>3</sub>N in EtOAc:hexanes = 1:9) to give the product (26.0 mg, 13:1 dr, 70% yield) as a colorless oil.  $R_f$  = 0.40 (silica gel, EtOAc:hexanes = 2:8);  $[\alpha]_D^{25} = +42.3^\circ$  ( $c = 2.00$ , CHCl<sub>3</sub>); IR (thin film)  $\nu_{\max} = 3009, 2974, 2931, 1691, 1590, 1570, 1474, 1436, 1391, 1366, 1325, 1291, 1250, 1147, 1102, 1049, 995.5, 883.4, 792.6, 763.1, 749.5, 725.6, 702.2, 680.1, 618.4$  cm<sup>-1</sup>; <sup>1</sup>H NMR (500 MHz, CDCl<sub>3</sub>)  $\delta$  8.58 (d,  $J = 4.0$  Hz, 1H), 7.63 (dt,  $J = 1.5, 7.5$  Hz, 1H), 7.22 (d,  $J = 7.5$  Hz, 1H), 7.18 (t,  $J = 5.5$  Hz, 1H), 5.64 (app.s, 1H), 5.17 (d,  $J = 13$  Hz, 1H), 4.94 (d,  $J = 12$  Hz, 1H), 3.14-3.21 (m, 1H), 2.73 (d,  $J = 15$  Hz, 3H), 2.01 (app.s, 2H), 1.68-1.88 (m, 2H), 1.54-1.67 (m, 1H), 1.48 (d,  $J = 31$  Hz, 9H), 1.47 (s, 1H); <sup>13</sup>C NMR (125 MHz, CDCl<sub>3</sub>)  $\delta$  148.9, 136.6, 129.0, 128.0, 125.4, 124.8, 122.4, 79.85, 79.45, 63.39, 62.23, 33.91, 28.54, 25.40, 20.90, 20.49; HRMS-ESI ( $m/z$ ):  $[M + Na]^+$  calcd for C<sub>18</sub>H<sub>26</sub>N<sub>2</sub>O<sub>2</sub>Na, 325.1892; found, 325.1899; Chiral HPLC: Chiralpak® IC column, isopropanol:heptane = 2:98, 0.80 mL/min,  $\lambda = 254$  nm;  $t_R = 13.76$  (minor), 16.80 (minor): >98% ee.

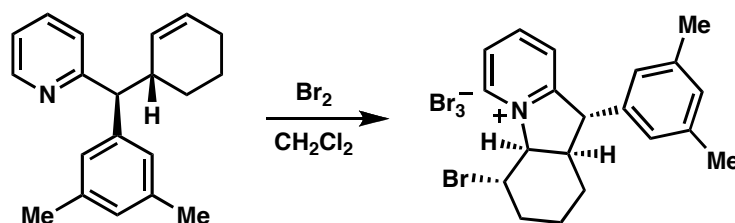

This bromocyclization was conducted under conditions adapted from those reported by Tunge.<sup>1</sup> Bromine (934  $\mu\text{L}$  of a 1.0 M solution in  $\text{CH}_2\text{Cl}_2$ , 0.934 mmol) was added to a solution of 2-((*S*)-((*S*)-cyclohex-2-enyl)(3,5-dimethylphenyl)methyl)pyridine (25.9 mg, 0.0934 mmol) in benzene (1.56 mL) at ca. 10  $^\circ\text{C}$ , after which the reaction was allowed to warm to ambient temperature. After 10 minutes, the solution was concentrated to afford the crude product (100% conversion by  $^1\text{H}$  NMR, >19:1 dr). Red cuboidal crystals suitable for X-ray diffraction were obtained by slow vapor diffusion of pentane into a solution of the pyridinium salt in  $\text{CH}_2\text{Cl}_2$  at ambient temperature. M.p.: 162-156 $^\circ\text{C}$ ;  $R_f$  = 0.14 (silica gel, MeOH:  $\text{CH}_2\text{Cl}_2$  = 1:9);  $[\alpha]_D^{25} = -3.77^\circ$  ( $c$  = 0.24,  $\text{CHCl}_3$ ); IR (thin film)  $\nu_{\text{max}}$  = 3434, 3400, 3306, 2921, 2859, 1626, 1495, 1156  $\text{cm}^{-1}$ . For thermal ellipsoid representation and additional crystal and structural refinement data, see S12. Intriguingly, the absolute stereochemistry of this product is opposite that which has been demonstrate for “soft” nucleophiles.<sup>2</sup>

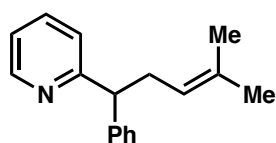

**2-(4-methyl-1-phenylpent-3-enyl)pyridine (7).** The reaction was performed with 41.1  $\mu\text{L}$  (0.185 mmol) of 2-benzylpyridine and 23.3  $\mu\text{L}$  (0.123 mmol) of 3-methylbut-2-enyl pivalate (**5**). The crude material was

purified by flash chromatography on silica gel (pretreated with 2%  $\text{Et}_3\text{N}$  in hexanes; eluted with 1%  $\text{Et}_3\text{N}$  in  $\text{EtOAc}$ :hexanes = 1:19) to give the product (21.7 mg, 74% yield, >19:1 linear:branched) as a yellow oil.  $R_f$  = 0.62 (silica gel,  $\text{EtOAc}$ :hexanes = 2:8);  $[\alpha]_D^{25} = -26.4^\circ$  ( $c$  = 1.00,  $\text{CHCl}_3$ ); IR (thin film)  $\nu_{\text{max}}$  3061, 3026, 2967, 2913, 1589, 1569, 1495, 1471, 1452, 1432, 745.8, 699.4  $\text{cm}^{-1}$ ;  $^1\text{H}$  NMR (500 MHz,  $\text{CDCl}_3$ )  $\delta$  8.57 (app.dq,  $J$  = 1.0, 5.0 Hz, 1H), 7.55 (dt,  $J$  = 2.0, 8.0 Hz, 1H), 7.34 (app.d,  $J$  = 8.0 Hz, 2H), 7.27 (app.t,  $J$  = 5.0 Hz, 2H), 7.18 (tt,  $J$  = 1.5, 8.5 Hz, 1H), 7.15 (d,  $J$  = 12 Hz, 1H), 7.08 (ddd,  $J$  = 1.0, 5.0, 6.5 Hz, 1H), 5.05 (tt,  $J$  = 1.5, 7.0 Hz, 1H), 4.08 (t,  $J$  = 7.5 Hz, 1H), 2.94 (ddd,  $J$  = 7.0, 7.0, 15 Hz, 1H), 2.77 (ddd,  $J$  = 7.0, 7.0, 15 Hz,

<sup>1</sup> Waetzig, S. R.; Tunge, J. A. *J. Am. Chem. Soc.* **2007**, *129*, 4138.

<sup>2</sup> Trost, B. Am.; Machacke, M. R.; Aponick, A. *Acc. Chem. Res.* **2006**, *39*, 747.



1H), 1.60 (s, 3H), 1.56 (s, 3H); <sup>13</sup>C NMR (125 MHz, CDCl<sub>3</sub>) δ 163.8, 149.3, 143.8, 136.4, 133.0, 128.4, 128.2, 126.36, 122.92, 122.4, 121.3, 53.97, 33.72, 25.78, 17.93; HRMS-ESI (*m/z*): [M + H]<sup>+</sup> calcd for C<sub>17</sub>H<sub>20</sub>N, 238.1596; found, 238.1590; Chiral HPLC: Chiralcel ® OD column, isopropanol:heptane = 0.5:99.5, 0.80 mL/min, λ = 254 nm; *t<sub>r</sub>* = 16.37 (major), 18.09 (minor): 89% ee. [Note: **L1** and **L2** give enantioenriched products of the opposite absolute stereochemistry.]

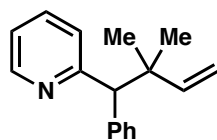

**2-(2,2-dimethyl-1-phenylbut-3-enyl)pyridine (8).** The reaction was performed with 41.1 μL (0.185 mmol) of 2-benzylpyridine and 24.7 μL (0.123 mmol) of 2-methylbut-3-en-2-yl pivalate (**6**). The crude material was purified

by flash chromatography on silica gel (pretreated with 2% Et<sub>3</sub>N in hexanes; eluted with 1% Et<sub>3</sub>N in EtOAc:hexanes = 1:19) to give the product (18.7 mg, 64% yield, >19:1 branched:linear) as a yellow oil. *R<sub>f</sub>* = 0.54 (silica gel, EtOAc:hexanes = 2:8); [α]<sub>D</sub><sup>25</sup> = -31.5° (*c* = 1.00, CHCl<sub>3</sub>); IR (thin film) *v*<sub>max</sub> = 2965, 1587, 1470, 1432, 1378, 1361, 1149, 997.2, 911.6, 745.7, 702.9 cm<sup>-1</sup>; <sup>1</sup>H NMR (500 MHz, CDCl<sub>3</sub>) δ 8.61 (dt, *J* = 1.0, 4.5 Hz, 1H), 7.59 (d, *J* = 7.5 Hz, 2H), 7.56 (dt, *J* = 2.0, 7.5 Hz, 1H), 7.30 (app.q, *J* = 7.0 Hz, 3H), 7.23 (d, *J* = 7.5 Hz, 1H), 7.11 (dd, *J* = 5.0, 8.0 Hz, 1H), 6.19 (dd, *J* = 11, 18 Hz, 1H), 5.01 (dd, *J* = 1.0, 11 Hz, 1H), 4.91 (dd, *J* = 1.5, 18 Hz, 1H), 3.98 (s, 1H), 1.15 (s, 3H), 1.14 (s, 3H); <sup>13</sup>C NMR (125 MHz, CDCl<sub>3</sub>) δ 160.2, 148.8, 146.5, 140.7, 135.7, 130.6, 127.6, 126.4, 124.7, 121.2, 111.6, 64.66, 41.07, 26.81, 26.17; HRMS-ESI (*m/z*): [M + H]<sup>+</sup> calcd for C<sub>17</sub>H<sub>20</sub>N, 238.1596; found, 238.1596; Chiral HPLC: Chiralcel ® OD column, isopropanol:heptane = 0.1:99.9, 0.80 mL/min, λ = 254 nm; *t<sub>r</sub>* = 12.82 (minor), 13.36 (major): 63% ee. [Note: Both **L1** and **L2** give enantioenriched products of the same absolute stereochemistry.]

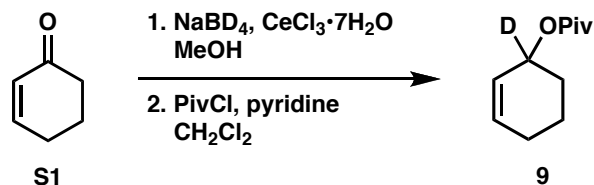

**Deuterium-labeled substrate (9).** NaBD<sub>4</sub> (87.0 mg, 2.08 mmol) was slowly added to a solution of cyclohex-2-enone (**S1**, 200 μL, 2.08 mmol) and CeCl<sub>3</sub>·7H<sub>2</sub>O (774 mg, 2.08 mmol) in MeOH

(3.5 mL) at ambient temperature. After 10 min, the reaction was diluted with E<sub>2</sub>O (10 mL) and then quenched by the slow addition of H<sub>2</sub>O (20 mL). The layers were separated and the product further extracted with E<sub>2</sub>O (2 × 10 mL). The combined organic layers were dried over MgSO<sub>4</sub>, filtered, and concentrated in vacuo to give the crude allylic alcohol as a clear oil, which was carried on without further purification.

Pivaloyl chloride (256 μL, 2.08 mmol) was slowly added to a solution of the allylic alcohol in pyridine (1.5 mL) and CH<sub>2</sub>Cl<sub>2</sub> (1.5 mL) at 0 °C. The reaction was allowed to warm to ambient temperature and stirred for 24 hours. The mixture was diluted with CH<sub>2</sub>Cl<sub>2</sub> (10 mL) and quenched by the addition of sat. aq. NH<sub>4</sub>Cl (10 mL). The layers were separated and the product further extracted with CH<sub>2</sub>Cl<sub>2</sub> (2 × 10 mL). The combined organic layers were dried over MgSO<sub>4</sub>, filtered, and concentrated in vacuo. The crude material was purified by flash chromatography on silica gel (EtOAc:hexanes = 1:19) to give the product (233 mg, 61% yield over two steps) as a pale yellow oil. *R*<sub>f</sub> = 0.61 (silica gel, EtOAc:hexanes = 2:8); IR (thin film)  $\nu_{\max}$  = 2977, 2874, 1810, 1724, 1480, 1461, 1396, 1368, 1291, 1265, 1157, 1124, 1080, 1044, 1006, 941.7 cm<sup>-1</sup>; <sup>1</sup>H NMR (500 MHz, CDCl<sub>3</sub>)  $\delta$  5.94 (dt, *J* = 3.5, 10 Hz, 1H), 5.68 (dt, *J* = 2.0, 10 Hz, 1H), 5.21-5.22 (m, 18% residual <sup>1</sup>H), 2.05-2.12 (m, 1H), 1.95-2.02 (m, 1H), 1.81-1.87 (m, 1H), 1.69-1.77 (m, 2H), 1.58-1.67 (m, 2H), 1.19 (s, 9H); <sup>13</sup>C NMR (125 MHz, CDCl<sub>3</sub>)  $\delta$  174.1, 132.5, 125.9, 40.28, 38.75, 28.21, 26.59, 24.99, 18.93.

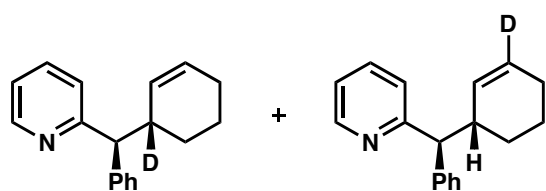

**Products 10 and 11.** The reaction was performed at half the usual scale with 14.9 μL (0.0925 mmol) of 2-benzylpyridine. The crude material was purified by flash chromatography on silica gel (pretreated

with 2% Et<sub>3</sub>N in hexanes; eluted with 1% Et<sub>3</sub>N in EtOAc:hexanes = 1:19) to give the product (15.2 mg, 9:1 dr, 99% yield with (*R,R*)-L1 and 14.3 mg, 9:1 dr, 93% yield with (*S,S*)-L1) as a colorless oil. *R*<sub>f</sub> = 0.53 (silica gel, EtOAc:hexanes = 2:8);  $[\alpha]_{\text{D}}^{25} = +34.7^\circ$  (*c* = 1.00, CHCl<sub>3</sub>); IR (thin film)  $\nu_{\max}$  = 3060, 3023, 2924, 2857, 1588, 1569, 1493, 1470, 1452, 1432, 766.2, 747.0, 700.3, 663.2, 590.4 cm<sup>-1</sup>; <sup>1</sup>H NMR (500 MHz, CDCl<sub>3</sub>)  $\delta$  8.59 (app.dd, *J* = 1.0, 5.0 Hz, 1H), 7.56 (app.t, *J* = 6.5 Hz, 1H), 7.42 (d, *J* = 7.5 Hz, 2H), 7.27 (t, *J* = 7.5 Hz, 2H), 7.23 (d, *J* = 8.5 Hz, 1H), 7.17 (tt, *J* = 1.0, 7.0 Hz, 1H), 7.09 (app.t, *J* = 5.0, Hz, 1H), 5.66 (dt, *J* = 3.5, 10 Hz, 1H),

5.32-5.34 (m, 1H), 3.75 (s, 1H), 3.22-3.28 (m, 1H), 1.97-2.00 (m, 1H), 1.69-1.74 (m, 1H), 1.48-1.59 (m, 2H), 1.15-1.31 (m, 2H);  $^{13}\text{C}$  NMR (125 MHz,  $\text{CDCl}_3$ )  $\delta$  163.0, 149.5, 142.8, 136.4, 130.0, 128.8, 128.44, 128.38, 126.4, 123.8, 121.3, 59.84, 39.05, 27.64, 25.52, 21.28. Chiral HPLC: Chiralpak® IC column, isopropanol:heptane = 2:98, 1.0 mL/min,  $\lambda$  = 254 nm; with (*R,R*)-**L1**:  $t_R$  = 5.23 (major), 5.81 (minor): 90% ee and with (*S,S*)-**L1**:  $t_R$  = 5.20 (minor), 5.68 (major): 91% ee.

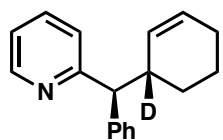

**Product *rac*-11.** The reaction was performed at half the usual scale with 14.9  $\mu\text{L}$  (0.0925 mmol) of 2-benzylpyridine. The crude material was purified by flash chromatography on silica gel (pretreated with 2%  $\text{Et}_3\text{N}$  in hexanes; eluted with 1%  $\text{Et}_3\text{N}$  in  $\text{EtOAc}$ :hexanes = 1:19) to give the product (14.9 mg, 9:1 dr, 97% yield) as a colorless oil.  $R_f$  = 0.53 (silica gel,  $\text{EtOAc}$ :hexanes = 2:8); IR (thin film)  $\nu_{\text{max}}$  = 3023, 2925, 2857, 1588, 1569, 1493, 1471, 1452, 1432, 747.3, 700.19, 664.5, 605.2  $\text{cm}^{-1}$ ;  $^1\text{H}$  NMR (500 MHz,  $\text{CDCl}_3$ )  $\delta$  8.60 (ddd,  $J$  = 0.5, 1.5, 5.5 Hz, 1H), 7.55 (dt,  $J$  = 2.0, 7.5 Hz, 1H), 7.42 (dd,  $J$  = 1.0, 8.5 Hz, 2H), 7.27 (t,  $J$  = 7.5 Hz, 2H), 7.23 (d,  $J$  = 8.0 Hz, 1H), 7.17 (dt,  $J$  = 1.5, 7.0 Hz, 1H), 7.07 (ddd,  $J$  = 1.0, 6.0, 6.5 Hz, 1H), 5.66 (dt,  $J$  = 3.5, 10 Hz, 1H), 5.34 (dq,  $J$  = 1.0, 11 Hz, 1H), 3.75 (s, 1H), 3.22-3.28 (m, 22%  $^1\text{H}$ ), 1.97-2.01 (m, 2H), 1.69-1.74 (m, 2H), 1.48-1.56 (m, 2H);  $^{13}\text{C}$  NMR (125 MHz,  $\text{CDCl}_3$ )  $\delta$  162.9, 149.5, 142.8, 136.4, 130.0, 128.8, 128.45, 128.38, 126.4, 123.8, 121.3, 67.98, 59.84, 27.64, 25.52, 21.28.

### Crystallographic Information for Bromocyclization Product

**Data collection.** A crystal (approximate dimensions 0.35 x 0.25 x 0.15mm<sup>3</sup>) was placed onto the tip of a 0.1 mm diameter glass capillary and mounted on a CCD area detector diffractometer for a data collection at 173(2) K.<sup>3</sup> A preliminary set of cell constants was calculated from reflections harvested from three sets of 20 frames. These initial sets of frames were oriented such that orthogonal wedges of reciprocal space were surveyed. This produced initial orientation matrices determined from 141 reflections. The data collection was carried out using MoK $\alpha$  radiation (graphite monochromator) with a frame time of 20 seconds and a detector distance of 4.8 cm. A randomly oriented region of reciprocal space was surveyed to the extent of one sphere and to a resolution of 0.77 Å. Four major sections of frames were collected with 0.30° steps in  $\omega$  at four different  $\phi$  settings and a detector position of  $-28^\circ$  in  $2\theta$ . The intensity data were corrected for absorption and decay (SADABS).<sup>4</sup> Final cell constants were calculated from 2990 strong reflections from the actual data collection after integration (SAINT).<sup>5</sup> Refer to Table 1 for additional crystal and refinement information.

**Structure solution and refinement.**<sup>6</sup> The structure was solved using Bruker SHELXTL<sup>7</sup> and refined using Bruker SHELXTL.<sup>5</sup> The space group P2<sub>1</sub>2<sub>1</sub>2<sub>1</sub> was determined based on systematic absences and intensity statistics. A direct-methods solution was calculated which provided most non-hydrogen atoms from the E-map. Full-matrix least squares / difference Fourier cycles were performed which located the remaining non-hydrogen atoms. All non-hydrogen atoms were refined with anisotropic displacement parameters. All hydrogen atoms were placed in ideal positions and refined as riding atoms with relative isotropic displacement parameters. The final full matrix least squares refinement converged to  $R1 = 0.0265$  and  $wR2 = 0.0573$  ( $F^2$ , all data).

Data collection and structure solution were conducted at the X-Ray Crystallographic Laboratory, 193 Kolthoff Hall, Department of Chemistry, University of Minnesota. All calculations were performed using Pentium computers using the current SHELXTL suite of programs.

---

<sup>3</sup> SMART V5.054, Bruker Analytical X-ray Systems, Madison, WI (2001).

<sup>4</sup> An empirical correction for absorption anisotropy, Blessing, R. *Acta Cryst.* **1995**, A51, 33.

<sup>5</sup> SAINT+ V6.45, Bruker Analytical X-Ray Systems, Madison, WI (2003).

<sup>6</sup> (a) Altomare, A.; Burla, M. C.; Camalli, M.; Cascarano, G.; Giacovazzo, C.; Guagliardi, A.; Moliterni, A. G. G.; Polidori, G.; Spagna, R. *Sir97. J. Appl. Cryst.* **1998**, 32, 115. (b) Burla, M. C.; Camalli, M.; Carrozzini, B.; Cascarano, G. L.; Giacovazzo, C.; Polidori, G.; Spagna, R. *Sir2002: A new direct methods program for automatic solution and refinement of crystal structures. J. Appl. Cryst.* **2003**, manuscript in preparation. (c) Spek, A. L.; *Acta Cryst.* **1990**, A46, C34. (d) Spek, A. L. PLATON, A Multipurpose Crystallographic Tool. **2000**, Utrecht University, Utrecht, The Netherlands.

<sup>7</sup> SHELXTL V6.14, Bruker Analytical X-Ray Systems, Madison, WI (2000).

**Figure S1.** ORTEP Drawing of Bromocyclization Product

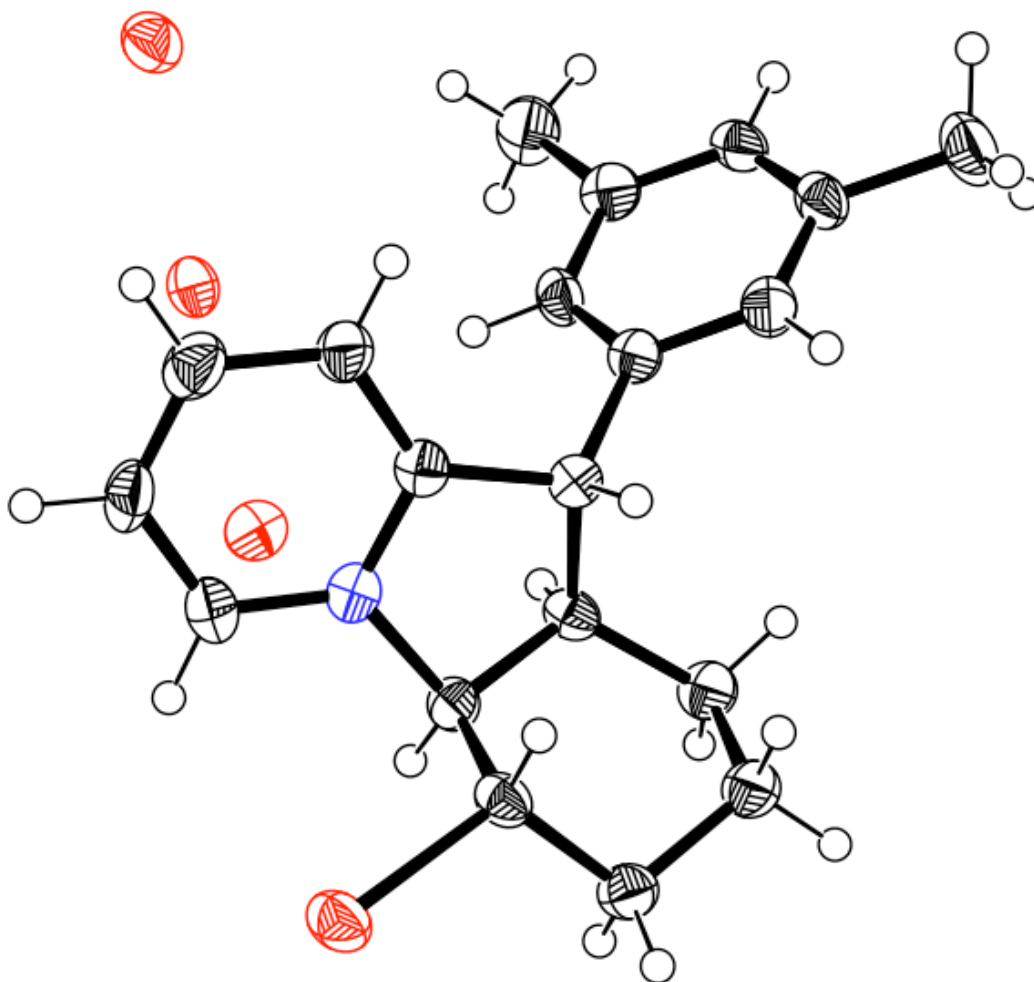

**Table S1.** Crystal data and structure refinement for bromocyclization product.

|                                        |                                                          |                     |
|----------------------------------------|----------------------------------------------------------|---------------------|
| Empirical formula                      | C <sub>20</sub> H <sub>23</sub> Br <sub>4</sub> N        |                     |
| Formula weight                         | 597.03                                                   |                     |
| Temperature                            | 173(2) K                                                 |                     |
| Wavelength                             | 0.71073 Å                                                |                     |
| Crystal system                         | Orthorhombic                                             |                     |
| Space group                            | P2 <sub>1</sub> 2 <sub>1</sub> 2 <sub>1</sub>            |                     |
| Unit cell dimensions                   | $a = 7.966(2)$ Å                                         | $\alpha = 90^\circ$ |
|                                        | $b = 8.544(2)$ Å                                         | $\beta = 90^\circ$  |
|                                        | $c = 31.115(8)$ Å                                        | $\gamma = 90^\circ$ |
| Volume                                 | 2117.8(9) Å <sup>3</sup>                                 |                     |
| Z                                      | 4                                                        |                     |
| Density (calculated)                   | 1.873 Mg/m <sup>3</sup>                                  |                     |
| Absorption coefficient                 | 7.605 mm <sup>-1</sup>                                   |                     |
| $F(000)$                               | 1160                                                     |                     |
| Crystal color, morphology              | Orange, Block                                            |                     |
| Crystal size                           | 0.35 x 0.25 x 0.15 mm <sup>3</sup>                       |                     |
| Theta range for data collection        | 2.47 to 27.50°                                           |                     |
| Index ranges                           | $-10 \leq h \leq 10, 0 \leq k \leq 11, 0 \leq l \leq 40$ |                     |
| Reflections collected                  | 24641                                                    |                     |
| Independent reflections                | 4838 [ $R(\text{int}) = 0.0402$ ]                        |                     |
| Observed reflections                   | 4371                                                     |                     |
| Completeness to $\theta = 27.50^\circ$ | 99.6%                                                    |                     |
| Absorption correction                  | Multi-scan                                               |                     |
| Max. and min. transmission             | 0.3950 and 0.1760                                        |                     |
| Refinement method                      | Full-matrix least-squares on $F^2$                       |                     |
| Data / restraints / parameters         | 4838 / 0 / 228                                           |                     |
| Goodness-of-fit on $F^2$               | 1.077                                                    |                     |
| Final $R$ indices [ $I > 2\sigma(I)$ ] | $R1 = 0.0265, wR2 = 0.0552$                              |                     |
| $R$ indices (all data)                 | $R1 = 0.0331, wR2 = 0.0573$                              |                     |
| Absolute structure parameter           | -0.004(10)                                               |                     |
| Largest diff. peak and hole            | 0.629 and -0.316 e.Å <sup>-3</sup>                       |                     |

**Table S2.** Atomic coordinates ( $\times 10^4$ ) and equivalent isotropic displacement parameters ( $\text{\AA}^2 \times 10^3$ ) for bromocyclization product.  $U_{\text{eq}}$  is defined as one third of the trace of the orthogonalized  $U_{ij}$  tensor.

|     | x       | y        | z       | $U_{\text{eq}}$ |
|-----|---------|----------|---------|-----------------|
| C1  | 4248(4) | 5215(4)  | 6022(1) | 27(1)           |
| C2  | 2651(4) | 4303(4)  | 5913(1) | 28(1)           |
| Br1 | 2865(1) | 3302(1)  | 5348(1) | 36(1)           |
| C3  | 2278(5) | 3127(4)  | 6264(1) | 32(1)           |
| C4  | 1848(5) | 4067(4)  | 6670(1) | 33(1)           |
| C5  | 3358(5) | 5021(4)  | 6815(1) | 34(1)           |
| C6  | 4124(4) | 6027(4)  | 6462(1) | 27(1)           |
| C7  | 3191(4) | 7586(4)  | 6358(1) | 26(1)           |
| C8  | 3776(4) | 7901(4)  | 5908(1) | 26(1)           |
| C9  | 3755(5) | 9258(4)  | 5670(1) | 33(1)           |
| C10 | 4452(5) | 9249(5)  | 5258(1) | 39(1)           |
| C11 | 5146(5) | 7902(5)  | 5095(1) | 37(1)           |
| C12 | 5137(4) | 6548(5)  | 5338(1) | 33(1)           |
| N1  | 4430(3) | 6587(3)  | 5731(1) | 27(1)           |
| C13 | 3552(5) | 8885(4)  | 6681(1) | 27(1)           |
| C14 | 5114(4) | 9602(4)  | 6689(1) | 30(1)           |
| C15 | 5474(5) | 10776(4) | 6982(1) | 35(1)           |
| C16 | 4251(5) | 11177(4) | 7282(1) | 33(1)           |
| C17 | 2689(5) | 10454(4) | 7286(1) | 33(1)           |
| C18 | 2344(5) | 9318(4)  | 6981(1) | 33(1)           |
| C19 | 7157(6) | 11610(5) | 6970(1) | 48(1)           |
| C20 | 1399(6) | 10890(5) | 7624(1) | 50(1)           |
| Br2 | 8691(1) | 7103(1)  | 6023(1) | 38(1)           |
| Br3 | 8530(1) | 10079(1) | 5847(1) | 32(1)           |
| Br4 | 8161(1) | 12965(1) | 5725(1) | 41(1)           |

**Table S3.** Bond lengths (Å) and angles (°) for bromocyclization product.

---

|              |          |
|--------------|----------|
| C(1)-N(1)    | 1.488(4) |
| C(1)-C(2)    | 1.530(5) |
| C(1)-C(6)    | 1.539(5) |
| C(1)-H(1A)   | 1.0000   |
| C(2)-C(3)    | 1.515(4) |
| C(2)-Br(1)   | 1.963(3) |
| C(2)-H(2A)   | 1.0000   |
| C(3)-C(4)    | 1.535(5) |
| C(3)-H(3A)   | 0.9900   |
| C(3)-H(3B)   | 0.9900   |
| C(4)-C(5)    | 1.521(5) |
| C(4)-H(4A)   | 0.9900   |
| C(4)-H(4B)   | 0.9900   |
| C(5)-C(6)    | 1.522(5) |
| C(5)-H(5A)   | 0.9900   |
| C(5)-H(5B)   | 0.9900   |
| C(6)-C(7)    | 1.559(4) |
| C(6)-H(6A)   | 1.0000   |
| C(7)-C(8)    | 1.502(4) |
| C(7)-C(13)   | 1.524(4) |
| C(7)-H(7A)   | 1.0000   |
| C(8)-N(1)    | 1.354(4) |
| C(8)-C(9)    | 1.375(5) |
| C(9)-C(10)   | 1.397(5) |
| C(9)-H(9A)   | 0.9500   |
| C(10)-C(11)  | 1.374(5) |
| C(10)-H(10A) | 0.9500   |
| C(11)-C(12)  | 1.383(5) |
| C(11)-H(11A) | 0.9500   |
| C(12)-N(1)   | 1.345(5) |
| C(12)-H(12A) | 0.9500   |
| C(13)-C(14)  | 1.387(5) |
| C(13)-C(18)  | 1.391(5) |
| C(14)-C(15)  | 1.387(5) |



|                  |           |
|------------------|-----------|
| C(14)-H(14A)     | 0.9500    |
| C(15)-C(16)      | 1.392(5)  |
| C(15)-C(19)      | 1.518(6)  |
| C(16)-C(17)      | 1.390(5)  |
| C(16)-H(16A)     | 0.9500    |
| C(17)-C(18)      | 1.386(5)  |
| C(17)-C(20)      | 1.516(5)  |
| C(18)-H(18A)     | 0.9500    |
| C(19)-H(19A)     | 0.9800    |
| C(19)-H(19B)     | 0.9800    |
| C(19)-H(19C)     | 0.9800    |
| C(20)-H(20A)     | 0.9800    |
| C(20)-H(20B)     | 0.9800    |
| C(20)-H(20C)     | 0.9800    |
| Br(2)-Br(3)      | 2.6045(8) |
| Br(3)-Br(4)      | 2.5121(8) |
| N(1)-C(1)-C(2)   | 110.3(3)  |
| N(1)-C(1)-C(6)   | 101.1(3)  |
| C(2)-C(1)-C(6)   | 112.0(3)  |
| N(1)-C(1)-H(1A)  | 111.0     |
| C(2)-C(1)-H(1A)  | 111.0     |
| C(6)-C(1)-H(1A)  | 111.0     |
| C(3)-C(2)-C(1)   | 109.9(3)  |
| C(3)-C(2)-Br(1)  | 112.0(2)  |
| C(1)-C(2)-Br(1)  | 110.4(2)  |
| C(3)-C(2)-H(2A)  | 108.1     |
| C(1)-C(2)-H(2A)  | 108.1     |
| Br(1)-C(2)-H(2A) | 108.1     |
| C(2)-C(3)-C(4)   | 106.9(3)  |
| C(2)-C(3)-H(3A)  | 110.3     |
| C(4)-C(3)-H(3A)  | 110.3     |
| C(2)-C(3)-H(3B)  | 110.3     |
| C(4)-C(3)-H(3B)  | 110.3     |
| H(3A)-C(3)-H(3B) | 108.6     |
| C(5)-C(4)-C(3)   | 110.3(3)  |
| C(5)-C(4)-H(4A)  | 109.6     |

|                    |          |
|--------------------|----------|
| C(3)-C(4)-H(4A)    | 109.6    |
| C(5)-C(4)-H(4B)    | 109.6    |
| C(3)-C(4)-H(4B)    | 109.6    |
| H(4A)-C(4)-H(4B)   | 108.1    |
| C(4)-C(5)-C(6)     | 114.0(3) |
| C(4)-C(5)-H(5A)    | 108.8    |
| C(6)-C(5)-H(5A)    | 108.8    |
| C(4)-C(5)-H(5B)    | 108.8    |
| C(6)-C(5)-H(5B)    | 108.8    |
| H(5A)-C(5)-H(5B)   | 107.7    |
| C(5)-C(6)-C(1)     | 114.4(3) |
| C(5)-C(6)-C(7)     | 116.2(3) |
| C(1)-C(6)-C(7)     | 103.3(3) |
| C(5)-C(6)-H(6A)    | 107.5    |
| C(1)-C(6)-H(6A)    | 107.5    |
| C(7)-C(6)-H(6A)    | 107.5    |
| C(8)-C(7)-C(13)    | 115.2(3) |
| C(8)-C(7)-C(6)     | 101.5(3) |
| C(13)-C(7)-C(6)    | 113.3(3) |
| C(8)-C(7)-H(7A)    | 108.8    |
| C(13)-C(7)-H(7A)   | 108.8    |
| C(6)-C(7)-H(7A)    | 108.8    |
| N(1)-C(8)-C(9)     | 119.0(3) |
| N(1)-C(8)-C(7)     | 110.5(3) |
| C(9)-C(8)-C(7)     | 130.5(3) |
| C(8)-C(9)-C(10)    | 118.9(4) |
| C(8)-C(9)-H(9A)    | 120.5    |
| C(10)-C(9)-H(9A)   | 120.5    |
| C(11)-C(10)-C(9)   | 120.2(4) |
| C(11)-C(10)-H(10A) | 119.9    |
| C(9)-C(10)-H(10A)  | 119.9    |
| C(10)-C(11)-C(12)  | 119.8(3) |
| C(10)-C(11)-H(11A) | 120.1    |
| C(12)-C(11)-H(11A) | 120.1    |
| N(1)-C(12)-C(11)   | 118.6(3) |
| N(1)-C(12)-H(12A)  | 120.7    |

|                     |           |
|---------------------|-----------|
| C(11)-C(12)-H(12A)  | 120.7     |
| C(12)-N(1)-C(8)     | 123.4(3)  |
| C(12)-N(1)-C(1)     | 125.0(3)  |
| C(8)-N(1)-C(1)      | 111.6(3)  |
| C(14)-C(13)-C(18)   | 119.4(3)  |
| C(14)-C(13)-C(7)    | 120.1(3)  |
| C(18)-C(13)-C(7)    | 120.4(3)  |
| C(13)-C(14)-C(15)   | 121.1(3)  |
| C(13)-C(14)-H(14A)  | 119.4     |
| C(15)-C(14)-H(14A)  | 119.4     |
| C(14)-C(15)-C(16)   | 118.4(4)  |
| C(14)-C(15)-C(19)   | 120.4(4)  |
| C(16)-C(15)-C(19)   | 121.2(3)  |
| C(17)-C(16)-C(15)   | 121.6(3)  |
| C(17)-C(16)-H(16A)  | 119.2     |
| C(15)-C(16)-H(16A)  | 119.2     |
| C(18)-C(17)-C(16)   | 118.9(3)  |
| C(18)-C(17)-C(20)   | 120.8(4)  |
| C(16)-C(17)-C(20)   | 120.3(3)  |
| C(17)-C(18)-C(13)   | 120.6(3)  |
| C(17)-C(18)-H(18A)  | 119.7     |
| C(13)-C(18)-H(18A)  | 119.7     |
| C(15)-C(19)-H(19A)  | 109.5     |
| C(15)-C(19)-H(19B)  | 109.5     |
| H(19A)-C(19)-H(19B) | 109.5     |
| C(15)-C(19)-H(19C)  | 109.5     |
| H(19A)-C(19)-H(19C) | 109.5     |
| H(19B)-C(19)-H(19C) | 109.5     |
| C(17)-C(20)-H(20A)  | 109.5     |
| C(17)-C(20)-H(20B)  | 109.5     |
| H(20A)-C(20)-H(20B) | 109.5     |
| C(17)-C(20)-H(20C)  | 109.5     |
| H(20A)-C(20)-H(20C) | 109.5     |
| H(20B)-C(20)-H(20C) | 109.5     |
| Br(4)-Br(3)-Br(2)   | 174.81(2) |

---

**Table S4.** Anisotropic displacement parameters ( $\text{\AA}^2 \times 10^3$ ) for bromocyclization product. The anisotropic displacement factor exponent takes the form:  $-2\pi^2[h^2a^{*2}U_{11} + \dots + 2hk a^* b^* U_{12}]$ 

|     | $U_{11}$ | $U_{22}$ | $U_{33}$ | $U_{23}$ | $U_{13}$ | $U_{12}$ |
|-----|----------|----------|----------|----------|----------|----------|
| C1  | 32(2)    | 27(2)    | 23(2)    | 3(1)     | -1(1)    | 3(1)     |
| C2  | 34(2)    | 27(2)    | 22(2)    | -3(1)    | -3(1)    | 5(1)     |
| Br1 | 50(1)    | 33(1)    | 26(1)    | -4(1)    | -3(1)    | 4(1)     |
| C3  | 38(2)    | 28(2)    | 30(2)    | 1(1)     | -2(2)    | -2(2)    |
| C4  | 43(2)    | 30(2)    | 27(2)    | 4(1)     | 0(2)     | 1(2)     |
| C5  | 47(2)    | 32(2)    | 23(2)    | 6(1)     | -5(2)    | 4(2)     |
| C6  | 29(2)    | 27(2)    | 25(2)    | -3(1)    | -5(1)    | 3(1)     |
| C7  | 25(2)    | 27(2)    | 26(2)    | 1(1)     | -2(1)    | 0(1)     |
| C8  | 25(2)    | 30(2)    | 24(2)    | -1(1)    | -4(1)    | -2(2)    |
| C9  | 41(2)    | 33(2)    | 24(2)    | 2(1)     | -2(2)    | -1(2)    |
| C10 | 50(2)    | 39(2)    | 29(2)    | 7(2)     | -4(2)    | -6(2)    |
| C11 | 43(2)    | 47(2)    | 21(2)    | 5(2)     | 3(2)     | -7(2)    |
| C12 | 30(2)    | 41(2)    | 28(2)    | -4(2)    | 4(2)     | 0(2)     |
| N1  | 23(1)    | 32(2)    | 26(2)    | 3(1)     | -3(1)    | 0(1)     |
| C13 | 32(2)    | 28(2)    | 21(2)    | 2(1)     | -4(2)    | 2(2)     |
| C14 | 34(2)    | 35(2)    | 20(2)    | -1(1)    | 3(1)     | 4(2)     |
| C15 | 41(2)    | 35(2)    | 28(2)    | 1(2)     | -7(2)    | -1(2)    |
| C16 | 52(2)    | 28(2)    | 18(2)    | -2(1)    | -3(2)    | 7(2)     |
| C17 | 45(2)    | 34(2)    | 21(2)    | 2(1)     | 3(2)     | 12(2)    |
| C18 | 32(2)    | 35(2)    | 31(2)    | 4(2)     | 2(2)     | 6(2)     |
| C19 | 52(2)    | 52(2)    | 40(2)    | -9(2)    | -1(2)    | -15(2)   |
| C20 | 62(3)    | 55(3)    | 33(2)    | -2(2)    | 14(2)    | 16(2)    |
| Br2 | 32(1)    | 39(1)    | 45(1)    | 3(1)     | -3(1)    | 1(1)     |
| Br3 | 28(1)    | 40(1)    | 30(1)    | -2(1)    | 1(1)     | 2(1)     |
| Br4 | 43(1)    | 40(1)    | 39(1)    | -1(1)    | 3(1)     | 9(1)     |

**Table S5.** Hydrogen coordinates ( $\times 10^4$ ) and isotropic displacement parameters ( $\text{\AA}^2 \times 10^3$ ) for bromocyclization product.

|      | x    | y     | z    | U(eq) |
|------|------|-------|------|-------|
| H1A  | 5259 | 4524  | 6007 | 33    |
| H2A  | 1696 | 5062  | 5899 | 33    |
| H3A  | 3268 | 2454  | 6316 | 38    |
| H3B  | 1321 | 2454  | 6181 | 38    |
| H4A  | 894  | 4777  | 6610 | 40    |
| H4B  | 1507 | 3343  | 6903 | 40    |
| H5A  | 4228 | 4297  | 6925 | 41    |
| H5B  | 3013 | 5707  | 7056 | 41    |
| H6A  | 5291 | 6303  | 6554 | 32    |
| H7A  | 1956 | 7381  | 6354 | 31    |
| H9A  | 3273 | 10186 | 5784 | 39    |
| H10A | 4447 | 10178 | 5090 | 47    |
| H11A | 5630 | 7901  | 4816 | 44    |
| H12A | 5620 | 5610  | 5231 | 40    |
| H14A | 5950 | 9283  | 6489 | 36    |
| H16A | 4490 | 11965 | 7489 | 39    |
| H18A | 1272 | 8831  | 6976 | 39    |
| H19A | 7249 | 12210 | 6703 | 72    |
| H19B | 8064 | 10836 | 6983 | 72    |
| H19C | 7243 | 12321 | 7216 | 72    |
| H20A | 1435 | 12021 | 7674 | 75    |
| H20B | 1649 | 10336 | 7892 | 75    |
| H20C | 277  | 10594 | 7523 | 75    |

**Table S6.** Torsion angles (°) for bromocyclization product.

---

|                |           |
|----------------|-----------|
| N1-C1-C2-C3    | -168.1(3) |
| C6-C1-C2-C3    | -56.3(4)  |
| N1-C1-C2-Br1   | 67.9(3)   |
| C6-C1-C2-Br1   | 179.7(2)  |
| C1-C2-C3-C4    | 66.2(4)   |
| Br1-C2-C3-C4   | -170.6(2) |
| C2-C3-C4-C5    | -63.7(4)  |
| C3-C4-C5-C6    | 52.0(4)   |
| C4-C5-C6-C1    | -41.6(4)  |
| C4-C5-C6-C7    | 78.7(4)   |
| N1-C1-C6-C5    | 160.7(3)  |
| C2-C1-C6-C5    | 43.2(4)   |
| N1-C1-C6-C7    | 33.4(3)   |
| C2-C1-C6-C7    | -84.0(3)  |
| C5-C6-C7-C8    | -157.2(3) |
| C1-C6-C7-C8    | -31.1(3)  |
| C5-C6-C7-C13   | 78.6(4)   |
| C1-C6-C7-C13   | -155.2(3) |
| C13-C7-C8-N1   | 140.0(3)  |
| C6-C7-C8-N1    | 17.2(3)   |
| C13-C7-C8-C9   | -39.0(5)  |
| C6-C7-C8-C9    | -161.8(4) |
| N1-C8-C9-C10   | -1.8(5)   |
| C7-C8-C9-C10   | 177.2(3)  |
| C8-C9-C10-C11  | 0.0(6)    |
| C9-C10-C11-C12 | 0.6(6)    |
| C10-C11-C12-N1 | 0.5(6)    |
| C11-C12-N1-C8  | -2.4(5)   |
| C11-C12-N1-C1  | 176.9(3)  |
| C9-C8-N1-C12   | 3.1(5)    |
| C7-C8-N1-C12   | -176.1(3) |
| C9-C8-N1-C1    | -176.3(3) |
| C7-C8-N1-C1    | 4.5(4)    |
| C2-C1-N1-C12   | -85.1(4)  |

|                 |           |
|-----------------|-----------|
| C6-C1-N1-C12    | 156.2(3)  |
| C2-C1-N1-C8     | 94.2(3)   |
| C6-C1-N1-C8     | -24.4(3)  |
| C8-C7-C13-C14   | -44.8(4)  |
| C6-C7-C13-C14   | 71.4(4)   |
| C8-C7-C13-C18   | 137.8(3)  |
| C6-C7-C13-C18   | -105.9(4) |
| C18-C13-C14-C15 | -2.0(5)   |
| C7-C13-C14-C15  | -179.3(3) |
| C13-C14-C15-C16 | 2.6(5)    |
| C13-C14-C15-C19 | -176.6(3) |
| C14-C15-C16-C17 | -1.2(5)   |
| C19-C15-C16-C17 | 177.9(4)  |
| C15-C16-C17-C18 | -0.7(5)   |
| C15-C16-C17-C20 | 178.5(3)  |
| C16-C17-C18-C13 | 1.4(5)    |
| C20-C17-C18-C13 | -177.9(3) |
| C14-C13-C18-C17 | -0.1(5)   |
| C7-C13-C18-C17  | 177.3(3)  |

---
